# Supplementary material for: Vitamin C supplementation reduces expression of circulating miR-451a in subjects with poorly controlled type 2 diabetes mellitus and high oxidative stress
Source: PeerJ journal article supplement (doi:10.7717/peerj.10776), 2021-02-04
Supplement: GEO_LR.zip [file GA_single_ch_LR.xls]

## Sheet: Metadata Template
SERIES
title	Vitamin C supplementation reduces expression of circulating miR-451a in poorly controlled type 2 diabetes mellitus
summary	Four miRNAs showed significantly different expression post-vitamin C supplementation including the down-regulation of miR-451a, and up-regulation of miR-1253, miR-1290 and miR-644a. Subsequent validation study showed only miR-451a expression was significantly different with supplementation.
overall design	Pre- and post-vitamin C supplementation samples from five participants who had increased vitamin C levels, improved oxidative status and polymorphonuclear (PMN) function after receiving 1,000 mg vitamin C daily for six weeks were screened for miRNA expression using the NanoString miRNA assay. Differences in miRNA expression identified from the miRNA screen were validated by qRT-PCR
contributor	Laongthip Ruknarong
contributor	Chanvit Leelayuwat
SAMPLES
Sample name	title	raw data file	source name	organism	characteristics: Disease	characteristics: Age	characteristics: Gender	molecule	description	platform
SN15BF	Subject 1 Pre-vitC_SN15BF	SN15BF.txt	Plasma from EDTA blood	Homo sapiens	poorly controlled type 2 diabetes mellitus	60	Female	Total RNA	Total RNA includes miRNAs were extracted from archived plasma sample	GPL24781
SN15AF	Subject 1 Post-vitC_SN15AF	SN15AF.txt	Plasma from EDTA blood	Homo sapiens	poorly controlled type 2 diabetes mellitus	60	Female	Total RNA	Total RNA includes miRNAs were extracted from archived plasma sample	GPL24781
SN16BF	Subject 2 Pre-vitC_SN16BF	SN16BF.txt	Plasma from EDTA blood	Homo sapiens	poorly controlled type 2 diabetes mellitus	51	Female	Total RNA	Total RNA includes miRNAs were extracted from archived plasma sample	GPL24781
SN16AF	Subject 2 Post-vitC_SN16AF	SN16AF.txt	Plasma from EDTA blood	Homo sapiens	poorly controlled type 2 diabetes mellitus	51	Female	Total RNA	Total RNA includes miRNAs were extracted from archived plasma sample	GPL24781
SN18BF	Subject 3 Pre-vitC_SN18BF	SN18BF.txt	Plasma from EDTA blood	Homo sapiens	poorly controlled type 2 diabetes mellitus	59	Male	Total RNA	Total RNA includes miRNAs were extracted from archived plasma sample	GPL24781
SN18AF	Subject 3 Post-vitC_SN18AF	SN18AF.txt	Plasma from EDTA blood	Homo sapiens	poorly controlled type 2 diabetes mellitus	59	Male	Total RNA	Total RNA includes miRNAs were extracted from archived plasma sample	GPL24781
SN20BF	Subject 4 Pre-vitC_SN20BF	SN20BF.txt	Plasma from EDTA blood	Homo sapiens	poorly controlled type 2 diabetes mellitus	53	Female	Total RNA	Total RNA includes miRNAs were extracted from archived plasma sample	GPL24781
SN20AF	Subject 4 Post-vitC_SN20AF	SN20AF.txt	Plasma from EDTA blood	Homo sapiens	poorly controlled type 2 diabetes mellitus	53	Female	Total RNA	Total RNA includes miRNAs were extracted from archived plasma sample	GPL24781
SN22BF	Subject 5 Pre-vitC_SN22BF	SN22BF.txt	Plasma from EDTA blood	Homo sapiens	poorly controlled type 2 diabetes mellitus	59	Female	Total RNA	Total RNA includes miRNAs were extracted from archived plasma sample	GPL24781
SN22AF	Subject 5 Post-vitC_SN22AF	SN22AF.txt	Plasma from EDTA blood	Homo sapiens	poorly controlled type 2 diabetes mellitus	59	Female	Total RNA	Total RNA includes miRNAs were extracted from archived plasma sample	GPL24781
PROTOCOLS
treatment protocol	Blood samples were collect from the participants before and after receiving 1,000 mg/day vitamin C for six weeks. The subjects who had increased plasma vitamin C levels, increased phagocytosis and oxidative burst, and reduced oxidative stress at the post-vitamin C supplementation timepoint compared to pre-supplementation were collected to investigate miRNA expression
extract protocol	Total RNA was extracted from 200 ul of plasma using the miRNeasy Serum/Plasma kit (Qiagen, Germany) according to the manufacturer’s instruction. Spike-in controls, cel-miR-39 and cel-miR-254, were added in this step.
label protocol	Total RNA was ligated to a specific miR-Tag and purification before hybridization step
hyb protocol	miRNAs were hybridized to the color-coded probes at 65 °C at least 12 hours.
scan protocol	Each sample was loaded into each well within one cartridge and was run at the same time. The data were collected by taking images of the immobilized fluorescent reporters in the sample cartridge with a CCD camera through a microscope objective lens at 196 fields of view. Images were processed internally, and each lane produces one RCC (Reporter Code Count).
data processing	We analyzed daya by using nSolver Analysis Software v. 4.0. Background threshold of 100 counts was set to eliminate all targets with low expression. Six positive controls and cel-miR-254 were used for data normalization. The count of each miRNA expression was transformed to Log2 data.
value definition	miRNA log2 count value

## Sheet: Matrix
# ID_REF from GPL24781
ID_REF	SN15BF	SN15AF	SN16BF	SN16AF	SN18BF	SN18AF	SN20BF	SN20AF	SN22BF	SN22AF
hsa-let-7a-5p	6.64	6.64	6.64	6.64	6.64	6.64	6.64	6.64	6.64	6.64
hsa-let-7b-5p	6.64	6.64	6.64	6.64	6.64	6.64	6.64	6.64	6.64	6.64
hsa-let-7c-5p	6.64	6.64	6.64	6.64	6.64	6.64	6.64	6.64	6.64	6.64
hsa-let-7d-5p	6.64	6.64	6.64	6.64	6.64	6.64	6.64	6.64	6.64	6.64
hsa-let-7e-5p	6.64	6.64	6.64	6.64	6.64	6.64	6.64	6.64	6.64	6.64
hsa-let-7f-5p	6.64	6.64	6.64	6.64	6.64	6.64	6.64	6.64	6.64	6.64
hsa-let-7g-5p	6.64	6.64	6.64	6.64	6.64	6.64	6.64	6.64	6.64	6.64
hsa-let-7i-5p	6.64	6.64	6.64	6.64	6.64	6.64	6.64	6.64	6.64	6.64
hsa-miR-1-3p	6.64	6.64	6.64	6.64	6.64	6.64	6.64	6.64	6.64	6.64
hsa-miR-1-5p	6.64	6.64	6.64	6.64	6.64	6.64	6.64	6.64	6.64	6.64
hsa-miR-100-5p	6.64	6.64	6.64	6.64	6.64	6.64	6.64	6.64	6.64	6.64
hsa-miR-101-3p	6.64	6.64	6.64	6.64	6.64	6.64	6.64	6.64	6.64	6.64
hsa-miR-103a-3p	6.64	6.64	6.64	6.64	6.64	6.64	6.64	6.64	6.64	6.64
hsa-miR-105-5p	6.64	6.64	6.64	6.64	6.64	6.64	6.64	6.64	6.64	6.64
hsa-miR-106a-5p+hsa-miR-17-5p	6.64	6.64	6.64	6.64	6.64	6.64	6.64	6.64	6.64	6.64
hsa-miR-106b-5p	6.64	6.64	6.64	6.64	6.64	6.64	6.64	6.64	6.64	6.64
hsa-miR-107	6.64	6.64	6.64	6.64	6.64	6.64	6.64	6.64	6.64	6.64
hsa-miR-10a-5p	6.64	6.64	6.64	6.64	6.64	6.64	6.64	6.64	6.64	6.64
hsa-miR-10b-5p	6.64	6.64	6.64	6.64	6.64	6.64	6.64	6.64	6.64	6.64
hsa-miR-1178-3p	6.64	6.64	6.64	6.64	6.64	6.64	6.64	6.64	6.64	6.64
hsa-miR-1180-3p	6.64	6.64	6.64	6.64	6.64	6.64	6.64	6.64	6.64	6.64
hsa-miR-1183	6.64	6.64	6.64	6.64	6.64	6.64	6.64	6.64	6.64	6.64
hsa-miR-1185-1-3p	6.64	6.64	6.64	6.64	6.64	6.64	6.64	6.64	6.64	6.64
hsa-miR-1185-2-3p	6.64	6.64	6.64	6.64	7.11	6.64	6.64	6.64	6.64	6.64
hsa-miR-1185-5p	6.64	6.64	6.64	6.64	6.64	6.64	6.64	6.64	6.64	6.64
hsa-miR-1193	6.64	6.64	6.64	6.64	6.64	6.64	6.64	6.64	6.64	6.64
hsa-miR-1197	6.64	6.64	6.64	6.64	6.64	6.64	6.64	6.64	6.64	6.64
hsa-miR-1200	6.64	6.64	6.64	6.64	6.64	6.64	6.64	6.64	6.64	6.64
hsa-miR-1202	6.64	6.64	6.64	6.64	6.64	6.64	6.64	6.64	6.64	6.64
hsa-miR-1203	6.64	6.64	6.64	6.64	6.64	6.64	6.64	6.64	6.64	6.64
hsa-miR-1204	6.64	6.64	6.64	6.64	6.64	6.64	6.64	6.64	6.64	6.64
hsa-miR-1205	6.64	6.64	6.64	6.64	6.64	6.64	6.64	6.64	6.64	6.64
hsa-miR-1206	6.64	6.64	6.64	6.64	7.08	6.64	6.64	6.64	6.64	6.64
hsa-miR-122-5p	8.39	8.28	6.64	7.27	7.5	7.45	7.99	7.56	6.64	8.41
hsa-miR-1224-3p	6.64	6.64	6.64	6.64	6.64	6.64	6.64	6.64	6.64	6.64
hsa-miR-1224-5p	6.64	6.64	6.64	6.64	6.64	6.64	6.64	6.64	6.64	6.64
hsa-miR-1226-3p	6.64	6.64	6.64	6.64	6.64	6.64	6.64	6.64	6.64	6.64
hsa-miR-1228-3p	6.64	6.64	6.64	6.64	6.64	6.64	6.64	6.64	6.64	6.64
hsa-miR-1233-3p	6.64	6.64	6.64	6.64	6.64	6.64	6.64	6.64	6.64	6.64
hsa-miR-1234-3p	6.64	6.64	6.64	6.64	6.64	6.64	6.64	6.64	6.64	6.64
hsa-miR-1236-3p	6.64	6.64	6.64	6.64	6.64	6.64	6.64	6.64	6.64	6.64
hsa-miR-124-3p	6.64	6.64	6.64	6.64	6.64	6.64	6.64	6.64	6.64	6.64
hsa-miR-1244	6.64	6.64	6.64	6.64	6.64	6.64	6.64	6.64	6.64	6.64
hsa-miR-1245a	6.64	6.64	6.64	6.64	6.64	6.64	6.64	6.64	6.64	6.64
hsa-miR-1245b-3p	6.64	6.64	6.64	6.64	6.64	6.64	6.64	6.64	6.64	6.64
hsa-miR-1245b-5p	6.64	6.64	6.64	6.64	6.64	6.64	6.64	6.64	6.64	6.64
hsa-miR-1246	6.64	6.64	6.64	6.64	6.64	6.64	6.64	6.64	6.64	6.64
hsa-miR-1247-5p	6.64	6.64	6.64	6.64	6.64	6.64	6.64	6.64	6.64	6.64
hsa-miR-1248	6.64	6.64	6.64	6.64	6.64	6.64	6.64	6.64	6.64	6.64
hsa-miR-1249-3p	6.64	6.64	6.64	6.64	6.64	6.64	6.64	6.64	6.64	6.64
hsa-miR-1249-5p	6.64	6.64	6.64	6.64	6.64	6.64	6.64	6.64	6.64	6.64
hsa-miR-1250-5p	6.64	6.64	6.64	6.64	6.64	6.64	6.64	6.64	6.64	6.64
hsa-miR-1252-5p	6.64	6.64	6.64	6.64	6.64	6.64	6.64	6.64	6.64	6.64
hsa-miR-1253	9.16	9.67	8.71	9.86	8.7	9.23	9.8	9.86	10.16	11.05
hsa-miR-1254	6.64	6.64	6.64	6.64	6.64	6.64	6.64	6.64	6.64	6.64
hsa-miR-1255a	6.64	6.64	6.64	6.64	6.64	6.64	6.64	6.64	6.64	6.64
hsa-miR-1255b-5p	6.64	6.64	6.64	6.64	6.64	6.64	6.64	6.64	6.64	6.64
hsa-miR-1257	6.64	6.64	6.64	6.64	6.64	6.64	6.64	6.64	6.64	6.64
hsa-miR-1258	6.64	6.64	6.64	6.64	6.64	6.64	6.64	6.64	6.64	6.64
hsa-miR-125a-3p	6.64	6.64	6.64	6.64	6.64	6.64	6.64	6.64	6.64	6.64
hsa-miR-125a-5p	6.64	6.64	6.64	6.64	6.64	6.64	6.64	6.64	6.64	6.64
hsa-miR-125b-5p	6.64	6.64	6.64	6.64	6.64	6.64	6.64	6.64	6.64	6.64
hsa-miR-126-3p	6.64	6.64	6.64	6.64	6.64	6.64	6.64	6.64	6.64	6.64
hsa-miR-1260a	6.64	6.64	6.64	6.64	6.64	6.64	6.64	6.64	6.64	6.64
hsa-miR-1260b	6.64	6.64	6.64	6.64	6.64	6.64	6.64	6.64	6.64	6.64
hsa-miR-1261	6.64	6.64	6.64	6.64	6.64	6.64	6.64	6.64	6.64	6.64
hsa-miR-1262	6.64	6.64	6.64	6.64	6.64	6.64	6.64	6.64	6.64	6.64
hsa-miR-1264	6.64	6.64	6.64	6.64	6.64	6.64	6.64	6.64	6.64	6.64
hsa-miR-1266-5p	6.64	6.64	6.64	6.64	6.64	6.64	6.64	6.64	6.64	6.64
hsa-miR-1268a	6.64	6.64	6.64	6.64	6.64	6.64	6.64	6.64	6.64	6.64
hsa-miR-1268b	6.64	6.64	6.64	6.64	6.64	6.64	6.64	6.64	6.64	6.64
hsa-miR-1269a	6.64	6.64	6.64	6.64	6.64	6.64	6.64	6.64	6.64	6.64
hsa-miR-1269b	6.64	6.64	6.64	6.64	6.64	6.64	6.64	6.64	6.64	6.64
hsa-miR-127-3p	6.64	6.64	6.64	6.64	6.64	6.64	6.64	6.64	6.64	6.64
hsa-miR-127-5p	6.64	6.64	6.64	6.64	6.64	6.64	6.64	6.64	6.64	6.64
hsa-miR-1270	6.64	6.64	6.64	6.64	6.64	6.64	6.64	6.64	6.64	6.64
hsa-miR-1271-3p	6.64	6.64	6.64	6.64	6.64	6.64	6.64	6.64	6.64	6.64
hsa-miR-1271-5p	6.64	6.64	6.64	6.64	6.64	6.64	6.64	6.64	6.64	6.64
hsa-miR-1272	6.64	6.64	6.64	6.64	6.64	6.64	6.64	6.64	6.64	6.64
hsa-miR-1273c	6.64	6.64	6.64	6.64	6.64	6.64	6.64	6.64	6.64	6.64
hsa-miR-1275	6.64	6.64	6.64	6.64	6.64	6.64	6.64	6.64	6.64	6.64
hsa-miR-1276	6.64	6.64	6.64	6.64	6.64	6.64	6.64	6.64	6.64	6.64
hsa-miR-1277-3p	6.64	6.64	6.64	6.64	6.64	6.64	6.64	6.64	6.64	6.64
hsa-miR-1278	6.64	6.64	6.64	6.64	6.64	6.64	6.64	6.64	6.64	6.64
hsa-miR-1279	6.64	6.64	6.64	6.64	6.64	6.64	6.64	6.64	6.64	6.64
hsa-miR-128-1-5p	6.64	6.64	6.64	6.64	6.64	6.64	6.64	6.64	6.64	6.64
hsa-miR-128-2-5p	6.64	6.64	6.64	6.64	6.64	6.64	6.64	6.64	6.64	6.64
hsa-miR-128-3p	6.64	6.64	6.64	6.64	6.64	6.64	6.64	6.64	6.64	6.64
hsa-miR-1281	6.64	6.64	6.64	6.64	6.64	6.64	6.64	6.64	6.64	6.64
hsa-miR-1283	6.64	6.64	6.64	6.64	6.64	6.64	6.64	6.64	6.64	6.64
hsa-miR-1285-3p	6.64	6.64	6.64	6.64	6.64	6.64	6.64	6.64	6.64	6.64
hsa-miR-1285-5p	6.64	6.64	6.64	6.64	6.64	6.64	6.64	6.64	6.64	6.64
hsa-miR-1286	6.64	6.64	6.64	6.64	6.64	6.64	6.64	6.64	6.64	6.64
hsa-miR-1287-3p	6.64	6.64	6.64	6.64	6.64	6.64	6.64	6.64	6.64	6.64
hsa-miR-1287-5p	6.64	6.64	6.64	6.64	6.64	6.64	6.64	6.64	6.64	6.64
hsa-miR-1288-3p	6.64	6.64	6.64	6.64	6.64	6.64	6.64	6.64	6.64	6.64
hsa-miR-1289	6.64	6.64	6.64	6.64	6.64	6.64	6.64	6.64	6.64	6.64
hsa-miR-129-2-3p	6.64	6.64	6.64	6.64	6.64	6.64	6.64	6.64	6.64	6.64
hsa-miR-129-5p	6.64	6.64	6.64	6.64	6.64	6.64	6.64	6.64	6.64	6.64
hsa-miR-1290	6.73	7.67	6.64	6.98	7.06	7.59	7.8	7.8	8.35	9.22
hsa-miR-1291	6.64	6.64	6.64	6.64	6.64	6.64	6.64	6.64	6.64	6.64
hsa-miR-1293	6.64	6.64	6.64	6.64	6.64	6.64	6.64	6.64	6.64	6.64
hsa-miR-1295a	6.64	6.64	6.64	6.64	6.64	6.64	6.64	6.64	6.64	6.64
hsa-miR-1296-3p	6.64	6.64	6.64	6.64	6.64	6.64	6.64	6.64	6.64	6.64
hsa-miR-1296-5p	6.64	6.64	6.64	6.64	6.64	6.64	6.64	6.64	6.64	6.64
hsa-miR-1297	6.64	6.64	6.64	6.64	6.64	6.64	6.64	6.64	6.64	6.64
hsa-miR-1298-5p	6.64	6.64	6.64	6.64	6.64	6.64	6.64	6.64	6.64	6.64
hsa-miR-1299	6.64	6.64	6.64	6.64	6.64	6.64	6.64	6.64	6.64	6.64
hsa-miR-1301-3p	6.64	6.64	6.64	6.64	6.64	6.64	6.64	6.64	6.64	6.64
hsa-miR-1302	6.64	6.64	6.64	6.64	6.64	6.64	6.64	6.64	6.64	6.64
hsa-miR-1303	6.64	6.64	6.64	6.64	6.64	6.64	6.64	6.64	6.64	6.64
hsa-miR-1304-3p	6.64	6.64	6.64	6.64	6.64	6.64	6.64	6.64	6.64	6.64
hsa-miR-1304-5p	6.64	6.64	6.64	6.64	6.64	6.64	6.64	6.64	6.64	6.64
hsa-miR-1305	6.64	6.64	6.64	6.64	6.64	6.64	6.64	6.64	6.64	6.64
hsa-miR-1306-3p	6.64	6.64	6.64	6.64	6.64	6.64	6.64	6.64	6.64	6.64
hsa-miR-1306-5p	6.64	6.64	6.64	6.64	6.64	6.64	6.64	6.64	6.64	6.64
hsa-miR-1307-3p	6.64	6.64	6.64	6.64	6.64	6.64	6.64	6.64	6.64	6.64
hsa-miR-1307-5p	6.64	6.64	6.64	6.64	6.64	6.64	6.64	6.64	6.64	6.64
hsa-miR-130a-3p	6.64	6.64	6.64	6.64	6.64	6.64	6.64	6.64	6.64	6.64
hsa-miR-130b-3p	6.64	6.64	6.64	6.64	6.64	6.64	6.64	6.64	6.64	6.64
hsa-miR-132-3p	6.64	6.64	6.64	6.64	6.64	6.64	6.64	6.64	6.64	6.64
hsa-miR-1322	6.64	6.64	6.64	6.64	6.64	6.64	6.64	6.64	6.64	6.64
hsa-miR-1323	6.64	6.64	6.64	6.64	6.64	6.64	6.64	6.64	6.64	6.64
hsa-miR-133a-3p	6.64	6.64	6.64	6.64	6.64	6.64	6.64	6.64	6.64	6.64
hsa-miR-133a-5p	6.64	6.64	6.64	6.64	6.64	6.64	6.64	6.64	6.64	6.64
hsa-miR-133b	6.64	6.64	6.64	6.64	6.64	6.64	6.64	6.64	6.64	6.64
hsa-miR-134-3p	6.64	6.64	6.64	6.64	6.64	6.64	6.64	6.64	6.64	6.64
hsa-miR-134-5p+hsa-miR-6728-5p	6.64	6.64	6.64	6.64	6.64	6.64	6.64	6.64	6.64	6.64
hsa-miR-135a-5p	6.64	6.64	6.64	6.64	6.64	6.64	6.64	6.64	6.64	6.64
hsa-miR-135b-5p	6.64	6.64	6.64	6.64	6.64	6.64	6.64	6.64	6.64	6.64
hsa-miR-136-5p	6.64	6.64	6.64	6.64	6.64	6.64	6.64	6.64	6.64	6.64
hsa-miR-137	6.64	6.64	6.64	6.64	6.64	6.64	6.64	6.64	6.64	6.64
hsa-miR-138-5p	6.64	6.64	6.64	6.64	6.64	6.64	6.64	6.64	6.64	6.64
hsa-miR-139-3p	6.64	6.64	6.64	6.64	6.64	6.64	6.64	6.64	6.64	6.64
hsa-miR-139-5p	6.64	6.64	6.64	6.64	6.64	6.64	6.64	6.64	6.64	6.64
hsa-miR-140-3p	6.64	6.64	6.64	6.64	6.64	6.64	6.64	6.64	6.64	6.64
hsa-miR-140-5p	6.64	6.64	6.64	6.64	6.64	6.64	6.64	6.64	6.64	6.64
hsa-miR-141-3p	6.64	6.64	6.64	6.64	6.64	6.64	6.64	6.64	6.64	6.64
hsa-miR-142-3p	6.64	6.64	6.64	6.64	6.64	6.64	6.64	6.64	6.64	6.64
hsa-miR-142-5p	6.64	6.64	6.64	6.64	6.64	6.64	6.64	6.64	6.64	6.64
hsa-miR-143-3p	6.64	6.64	6.64	6.64	6.64	6.64	6.64	6.64	6.64	6.64
hsa-miR-144-3p	6.64	6.64	6.64	6.64	6.64	6.64	6.64	6.64	6.64	6.64
hsa-miR-145-5p	6.64	6.64	6.64	6.64	6.64	6.64	6.64	6.64	6.64	6.64
hsa-miR-1469	6.64	6.64	6.64	6.64	6.64	6.64	6.64	6.64	6.64	6.64
hsa-miR-146a-5p	6.64	6.64	6.64	6.64	6.64	6.64	6.64	6.64	6.64	6.64
hsa-miR-146b-3p	6.64	6.64	6.64	6.64	6.64	6.64	6.64	6.64	6.64	6.64
hsa-miR-146b-5p	6.64	6.64	6.64	6.64	6.64	6.64	6.64	6.64	6.64	6.64
hsa-miR-147a	6.64	6.64	6.64	6.64	6.64	6.64	6.64	6.64	6.64	6.64
hsa-miR-147b	6.64	6.64	6.64	6.64	6.64	6.64	6.64	6.64	6.64	6.64
hsa-miR-148a-3p	6.64	6.64	6.64	6.64	6.64	6.64	6.64	6.64	6.64	6.64
hsa-miR-148b-3p	6.64	6.64	6.64	6.64	6.64	6.64	6.64	6.64	6.64	6.64
hsa-miR-149-5p	6.64	6.64	6.64	6.64	6.64	6.64	6.64	6.64	6.64	6.64
hsa-miR-150-5p	6.64	6.64	6.64	6.64	6.64	6.64	6.64	6.64	6.64	6.64
hsa-miR-151a-3p	6.64	6.64	6.64	6.64	6.64	6.64	6.64	6.64	6.64	6.64
hsa-miR-151a-5p	6.64	6.64	6.64	6.64	6.64	6.64	6.64	6.64	6.64	6.64
hsa-miR-151b	6.64	6.64	6.64	6.64	6.64	6.64	6.64	6.64	6.64	6.64
hsa-miR-152-3p	6.64	6.64	6.64	6.64	6.64	6.64	6.64	6.64	6.64	6.64
hsa-miR-152-5p	6.64	6.64	6.64	6.64	6.64	6.64	6.64	6.64	6.64	6.64
hsa-miR-153-3p	6.64	6.64	6.64	6.64	6.64	6.64	6.64	6.64	6.64	6.64
hsa-miR-1537-3p	6.64	6.64	6.64	6.64	6.64	6.64	6.64	6.64	6.64	6.64
hsa-miR-154-5p	6.64	6.64	6.64	6.64	6.64	6.64	6.64	6.64	6.64	6.64
hsa-miR-155-5p	6.64	6.64	6.64	6.64	6.64	6.64	6.64	6.64	6.64	6.64
hsa-miR-15a-5p	6.64	6.64	6.64	6.64	6.64	6.64	6.64	6.64	6.64	6.64
hsa-miR-15b-5p	6.64	6.64	6.64	6.64	6.64	6.64	6.64	6.64	6.64	6.64
hsa-miR-16-5p	6.64	6.64	6.64	6.64	6.64	6.64	6.64	6.64	6.64	6.64
hsa-miR-181a-2-3p	6.64	6.64	6.64	6.64	6.64	6.64	6.64	6.64	6.64	6.64
hsa-miR-181a-3p	6.64	6.64	6.64	6.64	6.64	6.64	6.64	6.64	6.64	6.64
hsa-miR-181a-5p	6.64	6.64	6.64	6.64	6.64	6.64	6.64	6.64	6.64	6.64
hsa-miR-181b-2-3p	6.64	6.64	6.64	6.64	6.64	6.64	6.64	6.64	6.64	6.64
hsa-miR-181b-5p+hsa-miR-181d-5p	6.64	6.64	6.64	6.64	6.64	6.64	6.64	6.64	6.64	6.64
hsa-miR-181c-5p	6.64	6.64	6.64	6.64	6.64	6.64	6.64	6.64	6.64	6.64
hsa-miR-181d-3p	6.64	6.64	6.64	6.64	6.64	6.64	6.64	6.64	6.64	6.64
hsa-miR-182-3p	6.64	6.64	6.64	6.64	6.64	6.64	6.64	6.64	6.64	6.64
hsa-miR-182-5p	6.64	6.64	6.64	6.64	6.64	6.64	6.64	6.64	6.64	6.64
hsa-miR-1827	6.64	6.64	6.64	6.64	6.64	6.64	6.64	6.64	6.64	6.64
hsa-miR-183-5p	6.64	6.64	6.64	6.64	6.64	6.64	6.64	6.64	6.64	6.64
hsa-miR-184	6.64	6.64	6.64	6.64	6.64	6.64	6.64	6.64	6.64	6.64
hsa-miR-185-5p	6.64	6.64	6.64	6.64	6.64	6.64	6.64	6.64	6.64	6.64
hsa-miR-186-5p	6.64	6.64	6.64	6.64	6.64	6.64	6.64	6.64	6.64	6.64
hsa-miR-187-3p	6.64	6.64	6.64	6.64	6.64	6.64	6.64	6.64	6.64	6.64
hsa-miR-188-3p	6.64	6.64	6.64	6.64	6.64	6.64	6.64	6.64	6.64	6.64
hsa-miR-188-5p	6.64	6.64	6.64	6.64	6.64	6.64	6.64	6.64	6.64	6.64
hsa-miR-18a-5p	6.64	6.64	6.64	6.64	6.64	6.64	6.64	6.64	6.64	6.64
hsa-miR-18b-5p	6.64	6.64	6.64	6.64	6.64	6.64	6.64	6.64	6.64	6.64
hsa-miR-1908-3p	6.64	6.64	6.64	6.64	6.64	6.64	6.64	6.64	6.64	6.64
hsa-miR-1908-5p	6.64	6.64	6.64	6.64	6.64	6.64	6.64	6.64	6.64	6.64
hsa-miR-1909-3p	6.64	6.64	6.64	6.64	6.64	6.64	6.64	6.64	6.64	6.64
hsa-miR-190a-3p	6.64	6.64	6.64	6.64	6.64	6.64	6.64	6.64	6.64	6.64
hsa-miR-190a-5p	6.64	6.64	6.64	6.64	6.64	6.64	6.64	6.64	6.64	6.64
hsa-miR-190b	6.64	6.64	6.64	6.64	6.64	6.64	6.64	6.64	6.64	6.64
hsa-miR-191-5p	6.64	6.64	6.64	6.64	6.64	6.64	6.64	6.64	6.64	6.64
hsa-miR-1910-3p	6.64	6.64	6.64	6.64	6.64	6.64	6.64	6.64	6.64	6.64
hsa-miR-1910-5p	6.64	6.64	6.64	6.64	6.64	6.64	6.64	6.64	6.64	6.64
hsa-miR-1915-3p	6.64	6.64	6.64	6.64	6.64	6.64	6.64	6.64	6.64	6.64
hsa-miR-192-5p	6.64	6.64	6.64	6.64	6.64	6.64	6.64	6.64	6.64	6.64
hsa-miR-193a-3p	6.64	6.64	6.64	6.64	6.64	6.64	6.64	6.64	6.64	6.64
hsa-miR-193a-5p+hsa-miR-193b-5p	6.64	6.64	6.64	6.64	6.64	6.64	6.64	6.64	6.64	6.64
hsa-miR-193b-3p	6.64	6.64	6.64	6.64	6.64	6.64	6.64	6.64	6.64	6.64
hsa-miR-194-5p	6.64	6.64	6.64	6.64	6.64	6.64	6.64	6.64	6.64	6.64
hsa-miR-195-5p	6.64	6.64	6.64	6.64	6.64	6.64	6.64	6.64	6.64	6.64
hsa-miR-196a-3p	6.64	6.64	6.64	6.64	6.64	6.64	6.64	6.64	6.64	6.64
hsa-miR-196a-5p	6.64	6.64	6.64	6.64	6.64	6.64	6.64	6.64	6.64	6.64
hsa-miR-196b-5p	6.64	6.64	6.64	6.64	6.64	6.64	6.64	6.64	6.64	6.64
hsa-miR-197-3p	6.64	6.64	6.64	6.64	6.64	6.64	6.64	6.64	6.64	6.64
hsa-miR-197-5p	6.64	6.64	6.64	6.64	6.64	6.64	6.64	6.64	6.64	6.64
hsa-miR-1972	6.64	6.64	6.64	6.64	6.64	6.64	6.64	6.64	6.64	6.64
hsa-miR-1973	6.64	6.64	6.64	6.64	6.64	6.64	6.64	6.64	6.64	6.64
hsa-miR-1976	6.64	6.64	6.64	6.64	6.64	6.64	6.64	6.64	6.64	6.64
hsa-miR-198	6.64	6.64	6.64	6.64	6.64	6.64	6.64	6.64	6.64	6.64
hsa-miR-199a-3p+hsa-miR-199b-3p	6.64	6.64	6.64	6.64	6.64	6.64	6.64	6.64	6.64	6.64
hsa-miR-199a-5p	6.64	6.64	6.64	6.64	6.64	6.64	6.64	6.64	6.64	6.64
hsa-miR-199b-5p	6.64	6.64	6.64	6.64	6.64	6.64	6.64	6.64	6.64	6.64
hsa-miR-19a-3p	6.64	6.64	6.64	6.64	6.64	6.64	6.64	6.64	6.64	6.64
hsa-miR-19b-3p	6.64	6.64	6.64	6.64	6.64	6.64	6.64	6.64	6.64	6.64
hsa-miR-200a-3p	6.64	6.64	6.64	6.64	6.64	6.64	6.64	6.64	6.64	6.64
hsa-miR-200b-3p	6.64	6.64	6.64	6.64	6.64	6.64	6.64	6.64	6.64	6.64
hsa-miR-200c-3p	6.64	6.64	6.64	6.64	6.64	6.64	6.64	6.64	6.64	6.64
hsa-miR-202-3p	6.64	6.64	6.64	6.64	6.64	6.64	6.64	6.64	6.64	6.64
hsa-miR-203a-3p	6.64	6.64	6.64	6.64	6.64	6.64	6.64	6.64	6.64	6.64
hsa-miR-203a-5p	6.64	6.64	6.64	6.64	6.64	6.64	6.64	6.64	6.64	6.64
hsa-miR-204-5p	6.64	6.64	6.64	6.64	6.64	6.64	6.64	6.64	6.64	6.64
hsa-miR-205-5p	6.64	6.64	6.64	6.64	6.64	6.64	6.64	6.64	6.64	6.64
hsa-miR-2053	6.64	6.64	6.64	6.64	6.64	6.64	6.64	6.64	6.64	6.64
hsa-miR-206	6.64	6.64	6.64	6.64	6.64	6.64	6.64	6.64	6.64	6.64
hsa-miR-208a-3p	6.64	6.64	6.64	6.64	6.64	6.64	6.64	6.64	6.64	6.64
hsa-miR-208b-3p	6.64	6.64	6.64	6.64	6.64	6.64	6.64	6.64	6.64	6.64
hsa-miR-208b-5p	6.64	6.64	6.64	6.64	6.64	6.64	6.64	6.64	6.64	6.64
hsa-miR-20a-5p+hsa-miR-20b-5p	6.64	6.64	6.64	6.64	6.64	6.64	6.64	6.64	6.64	6.64
hsa-miR-21-5p	6.64	6.64	6.64	6.64	6.64	6.64	6.64	6.64	6.64	6.64
hsa-miR-210-3p	6.64	6.64	6.64	6.64	6.64	6.64	6.64	6.64	6.64	6.64
hsa-miR-210-5p	6.64	6.64	6.64	6.64	6.64	6.64	6.64	6.64	6.64	6.64
hsa-miR-211-3p	6.64	6.64	6.64	6.64	6.64	6.64	6.64	6.64	6.64	6.64
hsa-miR-211-5p	6.64	6.64	6.64	6.64	6.64	6.64	6.64	6.64	6.64	6.64
hsa-miR-2110	6.64	6.64	6.64	6.64	6.64	6.64	6.64	6.64	6.64	6.64
hsa-miR-2113	6.64	6.64	6.64	6.64	6.64	6.64	6.64	6.64	6.64	6.64
hsa-miR-2116-5p	6.64	6.64	6.64	7.07	6.64	6.64	7.24	7.05	6.64	8.63
hsa-miR-2117	6.64	6.64	6.64	6.64	6.64	6.64	6.64	6.64	6.64	6.64
hsa-miR-212-3p	6.64	6.64	6.64	6.64	6.64	6.64	6.64	6.64	6.64	6.64
hsa-miR-214-3p	6.64	6.64	6.64	6.64	6.64	6.64	6.64	6.64	6.64	6.64
hsa-miR-215-5p	6.64	6.64	6.64	6.64	6.64	6.64	6.64	6.64	6.64	6.64
hsa-miR-216a-5p	6.64	6.64	6.64	6.64	6.64	6.64	6.64	6.64	6.64	6.64
hsa-miR-216b-5p	6.64	6.64	6.64	6.64	6.64	6.64	6.64	6.64	6.64	6.64
hsa-miR-217	6.64	6.64	6.64	6.64	6.64	6.64	6.64	6.64	6.64	6.64
hsa-miR-218-5p	6.64	6.64	6.64	6.64	6.64	6.64	6.64	6.64	6.64	6.64
hsa-miR-219a-1-3p	6.64	6.64	6.64	6.64	6.64	6.64	6.64	6.64	6.64	6.64
hsa-miR-219a-2-3p	6.64	6.64	6.64	6.64	6.64	6.64	6.64	6.64	6.64	6.64
hsa-miR-219a-5p	6.64	6.64	6.64	6.64	6.64	6.64	6.64	6.64	6.64	6.64
hsa-miR-219b-3p	6.64	6.64	6.64	6.64	6.64	6.64	6.64	6.64	6.64	6.64
hsa-miR-22-3p	6.64	6.64	6.64	6.64	6.64	6.64	6.64	6.64	6.64	6.64
hsa-miR-221-3p	6.64	6.64	6.64	6.64	6.64	6.64	6.64	6.64	6.64	6.64
hsa-miR-221-5p	6.64	6.64	6.64	6.64	6.64	6.64	6.64	6.64	6.64	6.64
hsa-miR-222-3p	6.64	6.64	6.64	6.64	6.64	6.64	6.64	6.64	6.64	6.64
hsa-miR-223-3p	6.64	6.64	9.03	6.64	6.64	6.64	6.64	6.64	6.64	6.64
hsa-miR-224-5p	6.64	6.64	6.64	6.64	6.64	6.64	6.64	6.64	6.64	6.64
hsa-miR-2278	6.64	6.64	6.64	6.64	6.64	6.64	6.64	6.64	6.64	6.64
hsa-miR-23a-3p	6.64	6.64	7.44	6.64	6.64	6.64	6.64	6.64	6.64	6.64
hsa-miR-23b-3p	6.64	6.64	6.64	6.64	6.64	6.64	6.64	6.64	6.64	6.64
hsa-miR-23c	6.64	6.64	6.64	6.64	6.64	6.64	6.64	6.64	6.64	6.64
hsa-miR-24-3p	6.64	6.64	6.64	6.64	6.64	6.64	6.64	6.64	6.64	6.64
hsa-miR-25-3p	6.64	6.64	6.64	6.64	6.64	6.64	6.64	6.64	6.64	6.64
hsa-miR-25-5p	6.64	6.64	6.64	6.64	6.64	6.64	6.64	6.64	6.64	6.64
hsa-miR-2682-5p	6.64	6.64	6.64	6.64	6.64	6.64	6.64	6.64	6.64	6.64
hsa-miR-26a-5p	6.64	6.64	6.64	6.64	6.64	6.64	6.64	6.64	6.64	6.64
hsa-miR-26b-5p	6.64	6.64	6.64	6.64	6.64	6.64	6.64	6.64	6.64	6.64
hsa-miR-27a-3p	6.64	6.64	6.64	6.64	6.64	6.64	6.64	6.64	6.64	6.64
hsa-miR-27b-3p	6.64	6.64	6.64	6.64	6.64	6.64	6.64	6.64	6.64	6.64
hsa-miR-28-3p	6.64	6.64	6.64	6.64	6.64	6.64	6.64	6.64	6.64	6.64
hsa-miR-28-5p	6.64	6.64	6.64	6.64	6.64	6.64	6.64	6.64	6.64	6.64
hsa-miR-296-3p	6.64	6.64	6.64	6.64	6.64	6.64	6.64	6.64	6.64	6.64
hsa-miR-296-5p	6.64	6.64	6.64	6.64	6.64	6.64	6.64	6.64	6.64	6.64
hsa-miR-297	6.64	6.64	6.64	6.64	6.64	6.64	6.64	6.64	6.64	6.64
hsa-miR-298	6.64	6.64	6.64	6.64	6.64	6.64	6.64	6.64	6.64	6.64
hsa-miR-299-3p	6.64	6.64	6.64	6.64	6.64	6.64	6.64	6.64	6.64	6.64
hsa-miR-299-5p	6.64	6.64	6.64	6.64	6.64	6.64	6.64	6.64	6.64	6.64
hsa-miR-29a-3p	6.64	6.64	6.64	6.64	6.64	6.64	6.64	6.64	6.64	6.64
hsa-miR-29b-3p	6.64	6.64	6.64	6.64	6.64	6.64	6.64	6.64	6.64	6.64
hsa-miR-29c-3p	6.64	6.64	6.64	6.64	6.64	6.64	6.64	6.64	6.64	6.64
hsa-miR-300	6.64	6.64	6.64	6.64	6.64	6.64	6.64	6.64	6.64	6.64
hsa-miR-301a-3p	6.64	6.64	6.64	6.64	6.64	6.64	6.64	6.64	6.64	6.64
hsa-miR-301a-5p	6.64	6.64	6.64	6.64	6.64	6.64	6.64	6.64	6.64	6.64
hsa-miR-301b-3p	6.64	6.64	6.64	6.64	6.64	6.64	6.64	6.64	6.64	6.64
hsa-miR-301b-5p	6.64	6.64	6.64	6.64	6.64	6.64	6.64	6.64	6.64	6.64
hsa-miR-302a-3p	6.64	6.64	6.64	6.64	6.64	6.64	6.64	6.64	6.64	6.64
hsa-miR-302a-5p	6.64	6.64	6.64	6.64	6.64	6.64	6.64	6.64	6.64	6.64
hsa-miR-302b-3p	6.64	6.64	6.64	6.64	6.64	6.64	6.64	6.64	6.64	6.64
hsa-miR-302c-3p	6.64	6.64	6.64	6.64	6.64	6.64	6.64	6.64	6.64	6.64
hsa-miR-302d-3p	7.59	8.29	7.08	8.48	8.62	8.31	8.27	8.35	8.88	9.51
hsa-miR-302e	6.64	6.64	6.64	6.64	6.64	6.64	6.64	6.64	6.64	6.64
hsa-miR-302f	6.64	6.64	6.64	6.64	6.64	6.64	6.64	6.64	6.64	6.64
hsa-miR-3065-3p	6.64	6.64	6.64	6.64	6.64	6.64	6.64	6.64	6.64	6.64
hsa-miR-3065-5p	6.64	6.64	6.64	6.64	6.64	6.64	6.64	6.64	6.64	6.64
hsa-miR-3074-3p	6.64	6.64	6.64	6.64	6.64	6.64	6.64	6.64	6.64	6.64
hsa-miR-30a-3p	6.64	6.64	6.64	6.64	6.64	6.64	6.64	6.64	6.64	6.64
hsa-miR-30a-5p	6.64	6.64	6.64	6.64	6.64	6.64	6.64	6.64	6.64	6.64
hsa-miR-30b-5p	6.64	6.64	6.64	6.64	6.64	6.64	6.64	6.64	6.64	6.64
hsa-miR-30c-5p	6.64	6.64	6.64	6.64	6.64	6.64	6.64	6.64	6.64	6.64
hsa-miR-30d-5p	6.64	6.64	6.64	6.64	6.64	6.64	6.64	6.64	6.64	6.64
hsa-miR-30e-3p	6.64	6.64	6.64	6.64	6.64	6.64	6.64	6.64	6.64	6.64
hsa-miR-30e-5p	6.64	7	6.64	6.91	6.64	7.13	7.25	7.51	6.64	8.41
hsa-miR-31-5p	6.64	6.64	6.64	6.64	6.64	6.64	6.64	6.64	6.64	6.64
hsa-miR-3127-5p	6.64	6.64	6.64	6.64	6.64	6.64	6.64	6.64	6.64	6.64
hsa-miR-3130-3p	6.64	6.64	6.64	6.64	6.64	6.64	6.64	6.64	6.64	6.64
hsa-miR-3131	6.64	6.64	6.64	6.64	6.64	6.64	6.64	6.64	6.64	6.64
hsa-miR-3136-5p	6.64	6.64	6.64	6.64	6.64	6.64	6.64	6.64	6.64	6.64
hsa-miR-3140-3p	6.64	6.64	6.64	6.64	6.64	6.64	6.64	6.64	6.64	6.64
hsa-miR-3140-5p	6.64	6.64	6.64	6.64	6.64	6.64	6.64	6.64	6.64	6.64
hsa-miR-3144-3p	6.64	6.64	6.64	6.64	6.91	7.48	7.29	6.98	8.06	8.26
hsa-miR-3144-5p	6.64	6.64	6.64	6.64	6.64	6.64	6.64	6.64	6.64	6.64
hsa-miR-3147	6.64	6.64	6.64	6.64	6.64	6.64	6.64	6.64	6.64	6.64
hsa-miR-3150b-3p	6.64	6.64	6.64	6.64	6.64	6.64	6.64	6.64	6.64	6.64
hsa-miR-3151-5p	6.64	6.64	6.64	6.64	6.64	6.64	6.64	6.64	6.64	6.64
hsa-miR-3158-3p	6.64	6.64	6.64	6.64	6.64	6.64	6.64	6.64	6.64	6.64
hsa-miR-3161	6.64	6.7	6.64	7.12	6.64	6.64	7.33	7.02	7.79	8.07
hsa-miR-3164	6.64	6.64	6.64	6.64	6.64	6.64	6.64	6.64	6.64	6.64
hsa-miR-3168	6.64	6.64	6.64	6.64	6.64	6.64	6.64	6.64	6.64	6.64
hsa-miR-3179	6.64	6.64	6.64	6.64	6.64	6.64	6.64	6.64	6.64	6.64
hsa-miR-3180	6.64	6.64	6.64	6.64	6.64	6.64	6.64	6.64	6.64	6.64
hsa-miR-3180-3p	6.64	6.64	6.64	6.64	6.64	6.64	6.64	6.64	6.64	6.64
hsa-miR-3180-5p	6.64	6.64	6.64	6.64	6.64	6.64	6.64	6.64	6.64	6.64
hsa-miR-3182	6.64	6.64	6.64	6.64	6.64	6.64	6.64	6.64	6.64	6.64
hsa-miR-3185	6.64	6.64	6.64	6.64	6.64	6.64	6.64	6.64	6.64	6.64
hsa-miR-3190-3p	6.64	6.64	6.64	6.64	6.64	6.64	6.64	6.64	6.64	6.64
hsa-miR-3192-5p	6.64	6.64	6.64	6.64	6.64	6.64	6.64	6.64	6.64	6.64
hsa-miR-3195	6.64	6.64	6.64	6.64	6.64	6.64	6.64	6.64	6.64	6.64
hsa-miR-3196	6.64	6.64	6.64	6.64	6.64	6.64	6.64	6.64	6.64	6.64
hsa-miR-32-5p	6.64	6.64	6.64	6.64	6.64	6.64	6.64	6.64	6.64	6.64
hsa-miR-3202	6.64	6.64	6.64	6.64	6.64	6.64	6.64	6.64	6.64	6.64
hsa-miR-320a	6.64	6.64	6.64	6.64	6.64	6.64	6.64	6.64	6.64	6.64
hsa-miR-320b	6.64	6.64	6.64	6.64	6.64	6.64	6.64	6.64	6.64	6.64
hsa-miR-320c	6.64	6.64	6.64	6.64	6.64	6.64	6.64	6.64	6.64	6.64
hsa-miR-320d	6.64	6.64	6.64	6.64	6.64	6.64	6.64	6.64	6.64	6.64
hsa-miR-320e	7.02	7.47	6.64	6.64	6.64	6.64	6.64	6.64	6.64	6.64
hsa-miR-323a-3p	6.64	6.64	6.64	6.64	6.64	6.64	6.64	6.64	6.64	6.64
hsa-miR-323a-5p	6.64	6.64	6.64	6.64	6.64	6.64	6.64	6.64	6.64	6.64
hsa-miR-323b-3p	6.64	6.64	6.64	6.64	6.64	6.64	6.64	6.64	6.64	6.64
hsa-miR-323b-5p	6.64	6.64	6.64	6.64	6.64	6.64	6.64	6.64	6.64	6.64
hsa-miR-324-3p	6.64	6.64	6.64	6.64	6.64	6.64	6.64	6.64	6.64	6.64
hsa-miR-324-5p	6.64	6.64	6.64	6.64	6.64	6.64	6.64	6.64	6.64	6.64
hsa-miR-325	6.64	6.64	6.64	6.64	6.64	6.64	6.64	6.64	6.64	6.64
hsa-miR-326	6.64	6.64	6.64	6.64	6.64	6.64	6.64	6.64	6.64	6.64
hsa-miR-328-3p	6.64	6.64	6.64	6.64	6.64	6.64	6.64	6.64	6.64	6.64
hsa-miR-328-5p	6.64	6.64	6.64	6.64	6.64	6.64	6.64	6.64	6.64	6.64
hsa-miR-329-3p	6.64	6.64	6.64	6.64	6.64	6.64	6.64	6.64	6.64	6.64
hsa-miR-329-5p	6.64	6.64	6.64	6.64	6.64	6.64	6.64	6.64	6.64	6.64
hsa-miR-330-3p	6.64	6.64	6.64	6.64	6.64	6.64	6.64	6.64	6.64	6.64
hsa-miR-330-5p	6.64	6.64	6.64	6.64	6.64	6.64	6.64	6.64	6.64	6.64
hsa-miR-331-3p	6.64	6.64	6.64	6.64	6.64	6.64	6.64	6.64	6.64	6.64
hsa-miR-331-5p	6.64	6.64	6.64	6.64	6.64	6.64	6.64	6.64	6.64	6.64
hsa-miR-335-5p	6.64	6.64	6.64	6.64	6.64	6.64	6.64	6.64	6.64	6.64
hsa-miR-337-3p	6.64	6.64	6.64	6.64	6.64	6.64	6.64	6.64	6.64	6.64
hsa-miR-337-5p	6.64	6.64	6.64	6.64	6.64	6.64	6.64	6.64	6.64	6.64
hsa-miR-338-5p	6.64	6.64	6.64	6.64	6.64	6.64	6.64	6.64	6.64	6.64
hsa-miR-339-3p	6.64	6.64	6.64	6.64	6.64	6.64	6.64	6.64	6.64	6.64
hsa-miR-339-5p	6.64	6.64	6.64	6.64	6.64	6.64	6.64	6.64	6.64	6.64
hsa-miR-33a-5p	6.64	6.64	6.64	6.64	6.64	6.64	6.64	6.64	6.64	6.64
hsa-miR-33b-5p	6.64	6.64	6.64	6.64	6.64	6.64	6.64	6.64	6.64	6.64
hsa-miR-340-5p	6.64	6.64	6.64	6.64	6.64	6.64	6.64	6.64	6.64	6.64
hsa-miR-342-3p	6.64	6.64	6.64	6.64	6.64	6.64	6.64	6.64	6.64	6.64
hsa-miR-342-5p	6.64	6.64	6.64	6.64	6.64	6.64	6.64	6.64	6.64	6.64
hsa-miR-345-3p	6.64	6.64	6.64	6.64	6.64	6.64	6.64	6.64	6.64	6.64
hsa-miR-345-5p	6.64	6.64	6.64	6.64	6.64	6.64	6.64	6.64	6.64	6.64
hsa-miR-346	6.64	6.64	6.64	6.64	6.64	6.64	6.64	6.64	6.64	6.64
hsa-miR-34a-5p	6.64	6.64	6.64	6.64	6.64	6.64	6.64	6.64	6.64	6.64
hsa-miR-34b-3p	6.64	6.64	6.64	6.64	6.64	6.64	6.64	6.64	6.64	6.64
hsa-miR-34c-3p	6.64	6.64	6.64	6.64	6.64	6.64	6.64	6.64	6.64	6.64
hsa-miR-34c-5p	6.64	6.64	6.64	6.64	6.64	6.64	6.64	6.64	6.64	6.64
hsa-miR-3605-3p	6.64	6.64	6.64	6.64	6.64	6.64	6.64	6.64	6.64	6.64
hsa-miR-3605-5p	6.64	6.64	6.64	6.64	6.64	6.64	6.64	6.64	6.64	6.64
hsa-miR-361-3p	6.64	6.64	6.64	6.64	6.64	6.64	6.64	6.64	6.64	6.64
hsa-miR-361-5p	6.64	6.64	6.64	6.64	6.64	6.64	6.64	6.64	6.64	6.64
hsa-miR-3613-3p	6.64	6.64	6.64	6.64	6.64	6.64	6.64	6.64	6.64	6.64
hsa-miR-3613-5p	6.64	6.64	6.64	6.64	6.64	6.64	6.64	6.64	6.64	6.64
hsa-miR-3614-3p	6.64	6.64	6.64	6.64	6.64	6.64	6.64	6.64	6.64	6.64
hsa-miR-3614-5p	6.64	6.64	6.64	6.64	6.64	6.64	6.64	6.64	6.64	6.64
hsa-miR-3615	6.64	6.64	6.64	6.64	6.64	6.64	6.64	6.64	6.64	6.64
hsa-miR-362-3p	6.64	6.64	6.64	6.64	6.64	6.64	6.64	6.64	6.64	6.64
hsa-miR-362-5p	6.64	6.64	6.64	6.64	6.64	6.64	6.64	6.64	6.64	6.64
hsa-miR-363-3p	6.64	6.64	6.64	6.64	7.07	7.36	7.19	7.31	7.61	6.64
hsa-miR-363-5p	6.64	6.64	6.64	6.64	6.64	6.64	6.64	6.64	6.64	6.64
hsa-miR-365a-3p+hsa-miR-365b-3p	6.64	6.64	6.64	6.64	6.64	6.64	6.64	6.64	6.64	6.64
hsa-miR-365b-5p	6.64	6.64	6.64	6.64	6.64	6.64	6.64	6.64	6.64	6.64
hsa-miR-367-3p	6.64	6.64	6.64	6.64	6.64	6.64	6.64	6.64	6.64	6.64
hsa-miR-369-3p	6.64	6.64	6.64	6.64	6.64	6.64	6.64	6.64	6.64	6.64
hsa-miR-369-5p	6.64	6.64	6.64	6.64	6.64	6.64	6.64	6.64	6.64	6.64
hsa-miR-3690	6.64	6.64	6.64	6.64	6.64	6.64	6.64	6.64	6.64	6.64
hsa-miR-370-3p	6.64	6.64	6.64	6.64	6.64	6.64	6.64	6.64	6.64	6.64
hsa-miR-370-5p	6.64	6.64	6.64	6.64	6.64	6.64	6.64	6.64	6.64	6.64
hsa-miR-371a-5p	6.64	6.64	6.64	6.64	6.64	6.64	6.64	6.64	6.64	6.64
hsa-miR-371b-5p	6.64	6.64	6.64	6.64	6.64	6.64	6.64	6.64	6.64	6.64
hsa-miR-372-3p	6.64	6.64	6.64	6.64	6.64	6.64	6.64	6.64	6.64	6.64
hsa-miR-373-3p	6.64	6.64	6.64	6.64	6.64	6.64	6.64	6.64	6.64	6.64
hsa-miR-374a-3p	6.64	6.64	6.64	6.64	6.64	6.64	6.64	6.64	6.64	6.64
hsa-miR-374a-5p	6.64	6.64	6.64	6.64	6.64	6.64	6.64	6.64	6.64	6.64
hsa-miR-374b-5p	6.64	6.64	6.64	6.64	6.64	6.64	6.64	6.64	6.64	6.64
hsa-miR-374c-5p	6.64	6.64	6.64	6.64	6.64	6.64	6.64	6.64	6.64	6.64
hsa-miR-375	6.64	6.64	6.64	6.64	6.64	6.64	6.64	6.64	6.64	6.64
hsa-miR-376a-2-5p	6.64	6.64	6.64	6.64	6.64	6.64	6.64	6.64	6.64	6.64
hsa-miR-376a-3p	6.64	6.64	6.64	6.64	6.64	6.64	6.64	6.64	6.64	6.64
hsa-miR-376b-3p	6.64	6.64	6.64	6.64	6.64	6.64	6.64	6.64	6.64	6.64
hsa-miR-376c-3p	6.64	6.64	6.64	6.64	6.64	6.64	6.64	6.64	6.64	6.64
hsa-miR-376c-5p	6.64	6.64	6.64	6.64	6.64	6.64	6.64	6.64	6.64	6.64
hsa-miR-377-3p	6.64	6.64	6.64	6.64	6.64	6.64	6.64	6.64	6.64	6.64
hsa-miR-378b	6.64	6.64	6.64	6.64	6.64	6.64	6.64	6.64	6.64	6.64
hsa-miR-378c	6.64	6.64	6.64	6.64	6.64	6.64	6.64	6.64	6.64	6.64
hsa-miR-378d	6.64	6.64	6.64	6.64	6.64	6.64	6.64	6.64	6.64	6.64
hsa-miR-378e	6.64	6.64	6.64	6.64	6.64	6.64	6.64	6.64	6.64	6.64
hsa-miR-378f	6.64	6.64	6.64	6.64	6.64	6.64	6.64	6.64	6.64	6.64
hsa-miR-378g	6.64	6.64	6.64	6.64	6.64	6.64	6.64	6.64	6.64	6.64
hsa-miR-378h	6.64	6.82	6.64	6.95	6.81	6.64	7.45	7.14	7.59	6.64
hsa-miR-378i	6.64	6.64	6.64	6.64	6.64	6.64	6.64	6.64	6.64	6.64
hsa-miR-379-5p	6.64	6.64	6.64	6.64	6.64	6.64	6.64	6.64	6.64	6.64
hsa-miR-380-3p	6.64	6.64	6.64	6.64	6.64	6.64	6.64	6.64	6.64	6.64
hsa-miR-381-3p	6.64	6.64	6.64	6.64	6.64	6.64	6.64	6.64	6.64	6.64
hsa-miR-381-5p	6.64	6.64	6.64	6.64	6.64	6.64	6.64	6.64	6.64	6.64
hsa-miR-382-3p	6.64	6.64	6.64	6.64	6.64	6.64	6.64	6.64	6.64	6.64
hsa-miR-382-5p	6.64	6.64	6.64	6.64	6.64	6.64	6.64	6.64	6.64	6.64
hsa-miR-383-5p	6.64	6.64	6.64	6.64	6.64	6.64	6.64	6.64	6.64	6.64
hsa-miR-384	6.64	6.64	6.64	6.64	6.64	6.64	6.64	6.64	6.64	6.64
hsa-miR-3916	6.64	6.64	6.64	6.64	6.64	6.64	6.64	6.64	6.64	6.64
hsa-miR-3918	6.64	6.64	6.64	6.64	6.64	6.64	6.64	6.64	6.64	6.64
hsa-miR-3928-3p	6.64	6.64	6.64	6.64	6.64	6.64	6.64	6.64	6.64	6.64
hsa-miR-3934-5p	6.64	6.64	6.64	6.64	6.64	6.64	6.64	6.64	6.64	6.64
hsa-miR-409-3p	6.64	6.64	6.64	6.64	6.64	6.64	6.64	6.64	6.64	6.64
hsa-miR-409-5p	6.64	6.64	6.64	6.64	6.64	6.64	6.64	6.64	6.64	6.64
hsa-miR-410-3p	6.64	6.64	6.64	6.64	6.64	6.64	6.64	6.64	6.64	6.64
hsa-miR-411-5p	6.64	6.64	6.64	6.64	6.64	6.64	6.64	6.64	6.64	6.64
hsa-miR-412-3p	6.64	6.64	6.64	6.64	6.64	6.64	6.64	6.64	6.64	6.64
hsa-miR-421	6.64	6.64	6.64	6.64	6.64	6.64	6.64	6.64	6.64	6.64
hsa-miR-422a	6.64	6.64	6.64	6.64	6.64	6.64	6.64	6.64	6.64	6.64
hsa-miR-423-3p	6.64	6.64	6.64	6.64	6.64	6.64	6.64	6.64	6.64	6.64
hsa-miR-423-5p	6.64	6.64	6.85	6.64	6.64	6.64	6.64	6.64	6.64	6.64
hsa-miR-424-5p	6.64	6.64	6.64	6.64	6.64	6.64	6.64	6.64	6.64	6.64
hsa-miR-425-5p	6.64	6.64	6.64	6.64	6.64	6.64	6.64	6.64	6.64	6.64
hsa-miR-4284	6.64	6.64	6.64	6.64	6.64	6.64	6.64	6.64	6.64	6.64
hsa-miR-4286	6.64	6.64	6.64	6.64	6.64	6.64	6.64	6.64	6.64	6.64
hsa-miR-429	6.64	6.64	6.64	6.64	6.64	6.64	6.64	6.64	6.64	6.64
hsa-miR-431-5p	6.64	6.64	6.64	6.64	6.64	6.64	6.64	6.64	6.64	6.64
hsa-miR-432-5p	6.64	6.64	6.64	6.64	6.64	6.64	6.64	6.64	6.64	6.64
hsa-miR-433-3p	6.64	6.64	6.64	6.64	6.64	6.64	6.64	6.64	6.64	6.64
hsa-miR-433-5p	6.64	6.64	6.64	6.64	6.64	6.64	6.64	6.64	6.64	6.64
hsa-miR-4421	6.64	6.64	6.64	6.64	6.64	6.64	6.64	6.64	6.64	6.64
hsa-miR-4425	6.64	6.64	6.64	6.64	6.64	6.64	6.64	6.64	6.64	6.64
hsa-miR-4431	6.64	6.64	6.64	6.64	6.64	6.64	6.64	6.64	6.64	6.64
hsa-miR-4435	6.64	6.64	6.64	6.64	6.64	6.64	6.64	6.64	6.64	6.64
hsa-miR-4443	6.64	6.64	6.64	6.73	6.64	6.64	6.64	6.64	6.64	6.64
hsa-miR-4448	6.64	6.64	6.64	6.64	6.64	6.64	6.64	6.64	6.64	6.64
hsa-miR-4451	6.64	6.64	6.64	6.64	6.64	6.64	6.64	6.64	6.64	6.64
hsa-miR-4454+hsa-miR-7975	8.25	9.27	6.64	7.39	7.38	7.54	8.58	6.64	8.89	9.36
hsa-miR-4455	6.64	6.64	6.64	6.64	6.64	6.64	6.64	6.64	6.64	6.64
hsa-miR-4458	6.64	6.64	6.64	6.64	6.64	6.64	6.64	6.64	6.64	6.64
hsa-miR-4461	6.64	6.64	6.64	6.64	6.64	6.64	6.64	6.64	6.64	6.64
hsa-miR-448	6.64	6.64	6.64	6.64	6.64	6.64	6.64	6.64	6.64	6.64
hsa-miR-4485-3p	6.64	6.64	6.64	6.64	6.64	6.64	6.64	6.64	6.64	6.64
hsa-miR-4488	6.64	6.64	6.64	6.64	6.64	6.64	6.64	6.64	6.64	6.64
hsa-miR-449a	6.64	6.64	6.64	6.64	6.64	6.64	6.64	6.64	6.64	6.64
hsa-miR-449b-5p	6.64	6.64	6.64	6.64	6.64	6.64	6.64	6.64	6.64	6.64
hsa-miR-449c-5p	6.64	6.64	6.64	6.64	6.64	6.64	6.64	6.64	6.64	6.64
hsa-miR-450a-1-3p	6.64	6.64	6.64	6.64	6.64	6.64	6.64	6.64	6.64	6.64
hsa-miR-450a-2-3p	6.64	6.64	6.64	6.64	6.64	6.64	6.64	6.64	6.64	6.64
hsa-miR-450a-5p	6.64	6.64	6.64	6.64	6.64	6.64	6.64	6.64	6.64	6.64
hsa-miR-450b-3p	6.64	6.64	6.64	6.64	6.64	6.64	6.64	6.64	6.64	6.64
hsa-miR-450b-5p	6.64	6.64	6.64	6.64	6.64	6.64	6.64	6.64	6.64	6.64
hsa-miR-4516	6.64	6.64	6.64	6.64	6.64	6.64	6.64	6.64	6.64	6.64
hsa-miR-451a	10.6	8.74	10.37	6.64	9.38	8.5	9.05	8.53	8.25	6.64
hsa-miR-452-5p	6.64	6.64	6.64	6.64	6.64	6.64	6.64	6.64	6.64	6.64
hsa-miR-4521	6.64	6.64	6.64	6.64	6.64	6.64	6.64	6.64	6.64	6.64
hsa-miR-4524a-5p	6.64	6.64	6.64	6.64	6.64	6.64	6.64	6.64	6.64	6.64
hsa-miR-4531	6.64	6.64	6.64	6.64	6.64	6.64	6.64	6.64	6.64	6.64
hsa-miR-4532	6.64	6.64	6.64	6.64	6.64	6.64	6.64	6.64	6.64	6.64
hsa-miR-4536-3p	6.64	6.64	6.64	6.64	6.64	6.64	6.64	6.64	6.64	6.64
hsa-miR-4536-5p	6.88	7.42	6.64	7.56	7.85	7.6	7.61	7.54	7.72	8.16
hsa-miR-454-3p	6.64	6.64	6.64	6.64	6.64	6.64	6.64	6.64	6.64	6.64
hsa-miR-455-3p	6.64	6.64	6.64	6.64	6.64	6.64	6.64	6.64	6.64	6.64
hsa-miR-455-5p	6.64	6.64	6.64	6.64	6.64	6.64	6.64	6.64	6.64	6.64
hsa-miR-4647	6.64	6.64	6.64	6.64	6.64	6.64	6.64	6.64	6.64	6.64
hsa-miR-4707-3p	6.64	6.64	6.64	6.64	6.64	6.64	6.64	6.64	6.64	6.64
hsa-miR-4707-5p	6.64	6.64	6.64	6.64	6.64	6.64	6.64	6.64	6.64	6.64
hsa-miR-4741	6.64	6.64	6.64	6.64	6.64	6.64	6.64	6.64	6.64	6.64
hsa-miR-4755-5p	6.64	6.64	6.64	6.64	6.64	6.64	6.64	6.64	6.64	6.64
hsa-miR-4787-3p	6.64	6.64	6.64	6.64	6.64	6.64	6.64	6.64	6.64	6.64
hsa-miR-4787-5p	6.64	6.64	6.64	6.64	6.64	6.64	6.64	6.64	6.64	6.64
hsa-miR-4792	6.64	6.64	6.64	6.64	6.64	6.64	6.64	6.64	6.64	6.64
hsa-miR-483-3p	6.64	6.64	6.64	6.64	6.64	6.64	6.64	6.64	6.64	6.64
hsa-miR-483-5p	6.64	6.64	6.64	6.64	6.64	6.64	6.64	6.64	6.64	6.64
hsa-miR-484	6.64	6.64	6.64	6.64	6.64	6.64	6.64	6.64	6.64	6.64
hsa-miR-485-3p	6.64	6.64	6.64	6.64	6.64	6.64	6.64	6.64	6.64	6.64
hsa-miR-485-5p	6.64	6.64	6.64	6.64	6.64	6.64	6.64	6.64	6.64	6.64
hsa-miR-486-3p	6.64	6.64	6.64	6.64	6.64	6.64	6.64	6.64	6.64	6.64
hsa-miR-487a-3p	6.64	6.64	6.64	6.64	6.64	6.64	6.64	6.64	6.64	6.64
hsa-miR-487b-3p	6.64	6.64	6.64	6.64	6.64	6.64	6.64	6.64	6.64	6.64
hsa-miR-487b-5p	6.64	6.64	6.64	6.64	6.64	6.64	6.64	6.64	6.64	6.64
hsa-miR-488-3p	6.64	6.64	6.64	6.64	6.64	6.64	6.64	6.64	6.64	6.64
hsa-miR-489-3p	6.64	6.64	6.64	6.64	6.64	6.64	6.64	6.64	6.64	6.64
hsa-miR-490-3p	6.64	6.64	6.64	6.64	6.64	6.64	6.64	6.64	6.64	6.64
hsa-miR-490-5p	6.64	6.64	6.64	6.64	6.64	6.64	6.64	6.64	6.64	6.64
hsa-miR-491-3p	6.64	6.64	6.64	6.64	6.64	6.64	6.64	6.64	6.64	6.64
hsa-miR-491-5p	6.64	6.64	6.64	6.64	6.64	6.64	6.64	6.64	6.64	6.64
hsa-miR-492	6.64	6.64	6.64	6.64	6.64	6.64	6.64	6.64	6.64	6.64
hsa-miR-493-3p	6.64	6.64	6.64	6.64	6.64	6.64	6.64	6.64	6.64	6.64
hsa-miR-494-3p	6.64	8.4	6.64	6.64	6.64	6.64	6.64	6.64	6.64	6.64
hsa-miR-494-5p	6.64	6.64	6.64	6.64	6.64	6.64	6.64	6.64	6.64	6.64
hsa-miR-495-3p	6.76	7.68	6.91	7.72	8.2	8.25	8.16	7.83	8.7	8.75
hsa-miR-495-5p	6.64	6.64	6.64	6.64	6.64	6.64	6.64	6.64	6.64	6.64
hsa-miR-496	6.64	6.64	6.64	6.64	6.64	6.64	6.64	6.64	6.64	6.64
hsa-miR-497-5p	6.64	6.64	6.64	6.64	6.64	6.64	6.64	6.64	6.64	6.64
hsa-miR-498	6.64	6.64	6.64	6.64	6.64	6.64	6.64	6.64	6.64	6.64
hsa-miR-499a-3p	6.64	6.64	6.64	6.64	6.64	6.64	6.64	6.64	6.64	6.64
hsa-miR-499a-5p	6.64	7.8	6.64	7.24	7.76	7.11	7.68	7.37	8.26	8.99
hsa-miR-499b-3p	6.64	6.64	6.64	6.64	6.64	6.64	6.64	6.64	6.64	6.64
hsa-miR-499b-5p	6.64	6.64	6.64	6.64	6.64	6.64	6.64	6.64	6.64	6.64
hsa-miR-5001-3p	6.64	6.64	6.64	6.64	6.64	6.64	6.64	6.64	6.64	6.64
hsa-miR-5001-5p	6.64	6.64	6.64	6.64	6.64	6.64	6.64	6.64	6.64	6.64
hsa-miR-500a-5p+hsa-miR-501-5p	6.64	6.64	6.64	6.64	6.64	6.64	6.64	6.64	6.64	6.64
hsa-miR-501-3p	6.64	6.64	6.64	6.64	6.64	6.64	6.64	6.64	6.64	6.64
hsa-miR-5010-3p	6.64	6.64	6.64	6.64	6.64	6.64	6.64	6.64	6.64	6.64
hsa-miR-5010-5p	6.64	6.64	6.64	6.64	6.64	6.64	6.64	6.64	6.64	6.64
hsa-miR-502-3p	6.64	6.64	6.64	6.64	6.64	6.64	6.64	6.64	6.64	6.64
hsa-miR-502-5p	6.64	6.64	6.64	6.64	6.64	6.64	6.64	6.64	6.64	6.64
hsa-miR-503-3p	6.64	6.64	6.64	6.64	6.64	6.64	6.64	6.64	6.64	6.64
hsa-miR-503-5p	6.64	6.64	6.64	6.64	6.64	6.64	6.64	6.64	6.64	6.64
hsa-miR-504-3p	6.64	6.64	6.64	6.64	6.64	6.64	6.64	6.64	6.64	6.64
hsa-miR-504-5p	6.64	6.64	6.64	6.64	6.64	6.64	6.64	6.64	6.64	6.64
hsa-miR-505-3p	6.64	6.64	6.64	6.64	6.64	6.64	6.64	6.64	6.64	6.64
hsa-miR-506-3p	6.64	6.64	6.64	6.64	6.64	6.64	6.64	6.64	6.64	6.64
hsa-miR-506-5p	6.64	6.64	6.64	6.64	6.64	6.64	6.64	6.64	6.64	6.64
hsa-miR-507	6.64	6.64	6.64	6.64	6.64	6.64	6.64	6.64	6.64	6.64
hsa-miR-508-3p	6.64	6.64	6.64	6.64	6.64	6.64	6.64	6.64	6.64	6.64
hsa-miR-508-5p	6.64	6.64	6.64	6.64	6.64	6.64	6.64	6.64	6.64	6.64
hsa-miR-509-3-5p	6.64	6.64	6.64	6.64	6.64	6.64	6.64	6.64	6.64	6.64
hsa-miR-509-3p	6.64	6.64	6.64	6.64	6.64	6.64	6.64	6.64	6.64	6.64
hsa-miR-509-5p	6.64	6.64	6.64	6.64	6.64	6.64	6.64	6.64	6.64	6.64
hsa-miR-510-3p	6.64	6.64	6.64	6.64	6.64	6.64	6.64	6.64	6.64	6.64
hsa-miR-510-5p	6.64	6.64	6.64	6.64	6.64	6.64	6.64	6.64	6.64	6.64
hsa-miR-511-5p	6.64	6.64	6.64	6.64	6.64	6.64	6.64	6.64	6.64	6.64
hsa-miR-512-3p	6.64	6.64	6.64	6.64	6.64	6.64	6.64	6.64	6.64	6.64
hsa-miR-512-5p	6.64	6.64	6.64	6.64	6.64	6.64	6.64	6.64	6.64	6.64
hsa-miR-513a-3p	6.64	6.64	6.64	6.64	6.64	6.64	6.64	6.64	6.64	6.64
hsa-miR-513a-5p	6.64	6.64	6.64	6.64	6.64	6.64	6.64	6.64	6.64	6.64
hsa-miR-513b-5p	6.64	6.64	6.64	6.64	6.64	6.64	6.64	6.64	6.64	6.64
hsa-miR-513c-3p	6.64	6.64	6.64	6.64	6.64	6.64	6.64	6.64	6.64	6.64
hsa-miR-513c-5p	6.64	6.64	6.64	6.64	6.64	6.64	6.64	6.64	6.64	6.64
hsa-miR-514a-3p	6.64	6.64	6.64	6.64	6.64	6.64	6.64	6.64	6.64	6.64
hsa-miR-514a-5p	6.64	6.64	6.64	6.64	6.64	6.64	6.64	6.64	6.64	6.64
hsa-miR-514b-3p	6.64	6.64	6.64	6.64	6.64	6.64	6.64	6.64	6.64	6.64
hsa-miR-514b-5p	6.64	6.64	6.64	6.64	6.64	6.64	6.64	6.64	6.64	6.64
hsa-miR-515-3p	6.64	6.64	6.64	6.64	6.64	6.64	6.64	6.64	6.64	6.64
hsa-miR-515-5p	6.64	6.64	6.64	6.64	6.64	6.64	6.64	6.64	6.64	6.64
hsa-miR-516a-3p+hsa-miR-516b-3p	6.64	6.64	6.64	6.64	6.64	6.64	6.64	6.64	6.64	6.64
hsa-miR-516a-5p	6.64	6.64	6.64	6.64	6.64	6.64	6.64	6.64	6.64	6.64
hsa-miR-516b-5p	6.64	6.64	6.64	6.64	6.64	6.64	6.64	6.64	6.64	6.64
hsa-miR-517a-3p	6.64	6.64	6.64	6.64	6.64	6.64	6.64	6.64	6.64	6.64
hsa-miR-517b-3p	6.64	6.64	6.64	6.64	6.64	6.64	6.64	6.64	6.64	6.64
hsa-miR-517c-3p+hsa-miR-519a-3p	6.64	6.64	6.64	6.64	6.64	6.64	6.64	6.64	6.64	6.64
hsa-miR-518b	6.64	6.64	6.64	6.64	6.64	6.64	6.64	6.64	6.64	6.64
hsa-miR-518c-3p	6.64	6.64	6.64	6.64	6.64	6.64	6.64	6.64	6.64	6.64
hsa-miR-518d-3p	6.64	6.64	6.64	6.64	6.64	6.64	6.64	6.64	6.64	6.64
hsa-miR-518e-3p	6.64	6.64	6.64	6.64	6.64	6.64	6.64	6.64	6.64	6.64
hsa-miR-518f-3p	6.64	6.64	6.64	6.64	6.64	6.64	6.64	6.64	6.64	6.64
hsa-miR-5196-3p+hsa-miR-6732-3p	6.64	6.64	6.64	6.64	6.64	6.64	6.64	6.64	6.64	6.64
hsa-miR-5196-5p	6.64	6.64	6.64	6.64	6.64	6.64	6.64	6.64	6.64	6.64
hsa-miR-519b-3p	6.64	6.64	6.64	6.64	6.64	6.64	6.64	6.64	6.64	6.64
hsa-miR-519b-5p+hsa-miR-519c-5p+hsa-miR-523-5p+hsa-miR-518e-5p+hsa-miR-522-5p+hsa-miR-519a-5p	6.64	6.64	6.64	6.64	6.64	6.64	6.64	6.64	6.64	6.64
hsa-miR-519c-3p	6.64	6.64	6.64	6.64	6.64	6.64	6.64	6.64	6.64	6.64
hsa-miR-519d-3p	6.64	6.64	6.64	6.64	6.64	6.64	6.64	6.64	6.64	6.64
hsa-miR-519e-3p	6.64	6.64	6.64	6.64	6.64	6.64	6.64	6.64	6.64	6.64
hsa-miR-520a-3p	6.64	6.64	6.64	6.64	6.64	6.64	6.64	6.64	6.64	6.64
hsa-miR-520a-5p	6.64	6.64	6.64	6.64	6.64	6.64	6.64	6.64	6.64	6.64
hsa-miR-520b	6.64	6.64	6.64	6.64	6.64	6.64	6.64	6.64	6.64	6.64
hsa-miR-520c-3p	6.64	6.64	6.64	6.64	6.64	6.64	6.64	6.64	6.64	6.64
hsa-miR-520d-3p	6.64	6.64	6.64	6.64	6.64	6.64	6.64	6.64	6.64	6.64
hsa-miR-520d-5p+hsa-miR-527+hsa-miR-518a-5p	6.64	6.64	6.64	6.64	6.64	6.64	6.64	6.64	6.64	6.64
hsa-miR-520e	6.64	6.64	6.64	6.64	6.64	6.64	6.64	6.64	6.64	6.64
hsa-miR-520f-3p	6.64	6.64	6.64	6.64	6.64	6.64	6.64	6.64	6.64	6.64
hsa-miR-520g-3p	6.64	6.64	6.64	6.64	6.64	6.64	6.64	6.64	6.64	6.64
hsa-miR-520h	6.64	6.64	6.64	6.64	6.64	6.64	6.64	6.64	6.64	6.64
hsa-miR-521	6.64	6.64	6.64	6.64	6.64	6.64	6.64	6.64	6.64	6.64
hsa-miR-522-3p	6.64	6.64	6.64	6.64	6.64	6.64	6.64	6.64	6.64	6.64
hsa-miR-523-3p	6.64	6.64	6.64	6.64	6.64	6.64	6.64	6.64	6.64	6.64
hsa-miR-524-3p	6.64	6.64	6.64	6.64	6.64	6.64	6.64	6.64	6.64	6.64
hsa-miR-525-3p	6.64	6.64	6.64	6.64	6.64	6.64	6.64	6.64	6.64	6.64
hsa-miR-525-5p	6.64	6.64	6.64	6.64	6.64	6.64	6.64	6.64	6.64	6.64
hsa-miR-526a+hsa-miR-518c-5p+hsa-miR-518d-5p	6.64	6.64	6.64	6.64	6.64	6.64	6.64	6.64	6.64	6.64
hsa-miR-526b-5p	6.64	6.64	6.64	6.64	6.64	6.64	6.64	6.64	6.64	6.64
hsa-miR-532-3p	6.64	6.64	6.64	6.64	6.64	6.64	6.64	6.64	6.64	6.64
hsa-miR-532-5p	6.64	6.64	6.64	6.64	6.64	6.64	6.64	6.64	6.64	6.64
hsa-miR-539-3p	6.64	6.64	6.64	6.64	6.64	6.64	6.64	6.64	6.64	6.64
hsa-miR-539-5p	6.64	6.64	6.64	6.64	6.64	6.64	6.64	6.64	6.64	6.64
hsa-miR-541-3p	6.64	6.64	6.64	6.64	6.64	6.64	6.64	6.64	6.64	6.64
hsa-miR-542-3p	6.64	6.64	6.64	6.64	6.64	6.64	6.64	6.64	6.64	6.64
hsa-miR-542-5p	6.64	6.64	6.64	6.64	6.64	6.64	6.64	6.64	6.64	6.64
hsa-miR-543	6.64	6.64	6.64	6.64	6.64	6.64	6.64	6.64	6.64	6.64
hsa-miR-544a	6.64	6.64	6.64	6.64	6.64	6.64	6.64	6.64	6.64	6.64
hsa-miR-545-3p	6.64	6.64	6.64	6.64	6.64	6.64	6.64	6.64	6.64	6.64
hsa-miR-548a-3p	6.64	6.64	6.64	6.64	6.64	6.64	6.64	6.64	6.64	6.64
hsa-miR-548a-5p	6.64	6.64	6.64	6.64	6.64	6.64	6.64	6.64	6.64	6.64
hsa-miR-548aa+hsa-miR-548t-3p	6.64	6.87	6.64	7.03	6.64	6.64	6.64	6.64	6.64	6.64
hsa-miR-548ad-3p	6.64	6.64	6.64	6.64	6.64	6.64	6.64	6.64	6.64	6.64
hsa-miR-548ah-5p	6.64	7.16	6.64	7.18	7.75	7.24	7.65	7.29	8.01	8.64
hsa-miR-548ai+hsa-miR-570-5p	6.64	6.64	6.64	6.64	6.64	6.64	6.64	6.64	6.64	6.64
hsa-miR-548ak	6.64	6.64	6.64	6.64	6.64	6.64	6.64	6.64	6.64	6.64
hsa-miR-548al	6.64	6.64	6.64	6.64	6.64	6.64	6.99	6.64	6.64	6.64
hsa-miR-548ar-3p	6.64	6.64	6.64	6.64	6.64	6.64	6.64	6.64	6.64	6.64
hsa-miR-548ar-5p	6.64	6.64	6.64	6.64	6.64	6.64	6.64	6.64	6.64	6.64
hsa-miR-548b-3p	6.64	6.64	6.64	6.64	6.64	6.64	6.64	6.64	6.64	6.64
hsa-miR-548c-5p+hsa-miR-548o-5p+hsa-miR-548am-5p	6.64	6.64	6.64	6.64	6.64	6.64	6.64	6.64	6.64	6.64
hsa-miR-548d-3p	6.64	6.64	6.64	6.64	6.64	6.64	6.64	6.64	6.64	6.64
hsa-miR-548d-5p	6.64	6.64	6.64	6.64	6.64	6.64	6.64	6.64	6.64	6.64
hsa-miR-548e-3p	6.64	6.64	6.64	6.64	6.64	6.64	6.64	6.64	6.64	6.64
hsa-miR-548e-5p	6.64	6.64	6.64	6.64	6.64	6.64	6.64	6.64	6.64	6.64
hsa-miR-548g-3p	6.79	7.31	6.64	7.48	7.25	7.53	7.65	7.54	7.7	8.26
hsa-miR-548h-5p	6.64	6.64	6.64	6.64	6.64	6.64	6.64	6.64	6.64	6.64
hsa-miR-548i	6.64	6.64	6.64	6.64	6.64	6.64	6.64	6.64	6.64	6.64
hsa-miR-548j-3p	6.64	6.64	6.64	6.64	6.64	6.64	6.64	6.64	6.64	6.64
hsa-miR-548j-5p	6.64	6.64	6.64	6.64	6.64	6.64	6.64	6.64	6.64	6.64
hsa-miR-548k	6.64	6.64	6.64	6.64	6.64	6.64	6.64	6.64	6.64	6.64
hsa-miR-548l	6.64	6.64	6.64	6.64	6.64	6.64	6.64	6.64	6.64	6.64
hsa-miR-548m	6.64	6.64	6.64	6.64	6.64	6.64	6.64	6.64	6.64	6.64
hsa-miR-548n	6.64	6.75	6.64	6.71	6.64	6.64	6.64	6.64	6.64	6.64
hsa-miR-548o-3p+hsa-miR-548ah-3p+hsa-miR-548av-3p	6.64	6.64	6.64	6.64	6.64	6.64	6.64	6.64	6.64	6.64
hsa-miR-548q	7.29	7.59	6.99	8.12	7.34	7.54	8.12	8.28	8.25	9.4
hsa-miR-548v	6.64	6.64	6.64	6.64	6.64	6.64	6.64	6.64	6.64	6.64
hsa-miR-548y	6.64	6.64	6.64	6.64	6.64	6.64	6.64	6.64	6.64	6.64
hsa-miR-548z+hsa-miR-548h-3p	6.64	6.64	6.64	6.64	6.64	6.64	6.64	6.64	6.64	6.64
hsa-miR-549a	7.46	7.87	6.78	8.11	7.5	7.46	8.12	8.04	8.5	9.04
hsa-miR-550a-5p	6.64	6.64	6.64	6.64	6.64	6.64	6.64	6.64	6.64	6.64
hsa-miR-551a	6.64	6.64	6.64	6.71	6.64	6.64	7.11	7.18	6.64	6.64
hsa-miR-551b-3p	6.64	6.64	6.64	6.64	6.64	6.64	6.64	6.64	6.64	6.64
hsa-miR-552-3p	6.64	6.64	6.64	6.64	6.64	6.64	6.64	6.64	6.64	6.64
hsa-miR-553	6.64	6.64	6.64	6.64	6.64	6.64	6.64	6.64	6.64	6.64
hsa-miR-554	6.64	6.64	6.64	6.64	6.64	6.64	6.64	6.64	6.64	6.64
hsa-miR-555	6.64	6.64	6.64	6.64	6.64	6.64	6.64	6.64	6.64	6.64
hsa-miR-556-3p	6.64	6.64	6.64	6.64	6.64	6.64	6.64	6.64	6.64	6.64
hsa-miR-556-5p	6.64	6.64	6.64	6.64	6.64	6.64	6.64	6.64	6.64	6.64
hsa-miR-561-3p	6.64	6.64	6.64	6.64	6.64	6.64	6.64	6.64	6.64	6.64
hsa-miR-561-5p	6.64	6.64	6.64	6.64	6.64	6.64	6.64	6.64	6.64	6.64
hsa-miR-562	6.64	6.64	6.64	6.64	6.64	6.64	6.64	6.64	6.64	6.64
hsa-miR-563	6.64	6.64	6.64	6.64	6.64	6.64	6.64	6.64	6.64	6.64
hsa-miR-564	6.64	6.64	6.64	6.64	6.64	6.64	6.64	6.64	6.64	6.64
hsa-miR-566	6.64	6.64	6.64	6.64	6.64	6.64	6.64	6.64	6.64	6.64
hsa-miR-567	6.64	6.64	6.64	6.64	6.64	6.64	6.64	6.64	6.64	6.64
hsa-miR-568	6.64	6.64	6.64	6.64	6.64	6.64	6.64	6.64	6.64	6.64
hsa-miR-570-3p	6.64	6.64	6.64	6.64	6.64	6.64	6.64	6.64	6.64	6.64
hsa-miR-571	6.64	6.64	6.64	6.64	6.64	6.64	6.64	6.64	6.64	6.64
hsa-miR-572	6.64	6.64	6.64	6.64	6.64	6.64	6.64	6.64	6.64	6.64
hsa-miR-573	6.64	6.64	6.64	6.64	6.64	6.64	6.64	6.64	6.64	6.64
hsa-miR-574-3p	6.64	6.64	6.64	6.64	6.64	6.64	6.64	6.64	6.64	6.64
hsa-miR-574-5p	6.64	6.64	6.64	6.64	6.64	6.64	6.64	6.64	6.64	6.64
hsa-miR-575	6.64	6.64	6.64	6.64	6.64	6.64	6.64	6.64	6.64	6.64
hsa-miR-576-3p	6.64	6.64	6.64	6.64	6.64	6.64	6.64	6.64	6.64	6.64
hsa-miR-576-5p	6.64	6.64	6.64	6.64	6.64	6.64	6.64	6.64	6.64	6.64
hsa-miR-577	6.64	6.64	6.64	6.64	6.64	6.64	6.64	6.64	6.64	6.64
hsa-miR-578	6.64	6.64	6.64	6.64	6.64	6.64	6.64	6.64	6.64	6.64
hsa-miR-579-3p	9.21	9.84	6.64	8.19	6.64	6.64	6.64	6.64	6.64	6.64
hsa-miR-579-5p	6.64	6.64	6.64	6.64	6.64	6.64	6.64	6.64	6.64	6.64
hsa-miR-580-3p	6.64	6.64	6.64	6.64	6.64	6.64	6.64	6.64	6.64	6.64
hsa-miR-582-3p	6.64	6.64	6.64	6.64	6.64	6.64	6.64	6.64	6.64	6.64
hsa-miR-582-5p	6.64	6.64	6.64	6.64	6.64	6.64	6.64	6.64	6.64	6.64
hsa-miR-584-3p	6.64	6.64	6.64	6.64	6.64	6.64	6.64	6.64	6.64	6.64
hsa-miR-584-5p	6.64	6.64	6.64	6.64	6.64	6.64	6.64	6.64	6.64	6.64
hsa-miR-585-3p	6.64	6.64	6.64	6.64	6.81	6.64	6.64	6.64	6.64	6.64
hsa-miR-587	6.64	6.64	6.64	6.64	6.64	6.64	6.64	6.64	6.64	6.64
hsa-miR-589-5p	6.64	6.64	6.64	6.64	6.64	6.64	6.64	6.64	6.64	6.64
hsa-miR-590-3p	6.64	6.64	6.64	6.64	6.64	6.64	6.64	6.64	6.64	6.64
hsa-miR-590-5p	6.88	7.14	6.64	7.73	6.88	7.37	7.88	7.86	7.88	8.34
hsa-miR-591	6.64	6.64	6.64	6.64	6.64	6.64	6.64	6.64	6.64	6.64
hsa-miR-592	6.64	6.64	6.64	6.64	6.64	6.64	6.64	6.64	6.64	6.64
hsa-miR-593-3p	6.64	6.64	6.64	6.64	6.64	6.64	6.64	6.64	6.64	6.64
hsa-miR-595	6.64	6.64	6.64	6.64	6.64	6.64	6.64	6.64	6.64	6.64
hsa-miR-596	6.64	6.64	6.64	6.64	6.64	6.64	6.64	6.64	6.64	6.64
hsa-miR-597-5p	6.64	6.64	6.64	6.64	6.64	6.64	6.64	6.64	6.64	6.64
hsa-miR-598-3p	6.64	6.64	6.64	6.64	6.64	6.64	6.64	6.64	6.64	6.64
hsa-miR-599	6.64	6.64	6.64	6.64	6.64	6.64	6.64	6.64	6.64	6.64
hsa-miR-600	6.64	6.64	6.64	6.64	6.64	6.64	6.64	6.64	6.64	6.64
hsa-miR-601	6.64	6.64	6.64	6.64	6.64	6.64	6.64	6.64	6.64	6.64
hsa-miR-603	6.64	6.64	6.64	6.64	6.64	6.64	6.64	6.64	6.64	6.64
hsa-miR-604	6.64	6.64	6.64	6.64	6.64	6.64	6.64	6.64	6.64	6.64
hsa-miR-605-5p	6.64	6.64	6.64	6.64	6.64	6.64	6.64	6.64	6.64	6.64
hsa-miR-606	6.64	6.64	6.64	6.64	6.64	6.64	6.64	6.64	6.64	6.64
hsa-miR-607	6.64	6.64	6.64	6.64	6.64	6.64	6.64	6.64	6.64	6.64
hsa-miR-608	6.64	6.64	6.64	6.64	6.64	6.64	6.64	6.64	6.64	6.64
hsa-miR-610	6.64	6.64	6.64	6.64	6.64	6.64	6.64	6.64	6.64	6.64
hsa-miR-612	6.64	6.64	6.64	6.97	6.64	6.97	7.19	6.64	6.64	8.21
hsa-miR-613	6.64	6.64	6.64	6.64	6.64	6.64	6.64	6.64	6.64	6.64
hsa-miR-614	6.64	6.64	6.64	6.64	6.64	6.64	6.64	6.64	6.64	6.64
hsa-miR-615-3p	6.64	6.64	6.64	6.64	6.64	6.64	6.64	6.64	6.64	6.64
hsa-miR-615-5p	6.64	6.64	6.64	6.64	6.64	6.64	6.64	6.64	6.64	6.64
hsa-miR-616-3p	6.64	6.64	6.64	6.64	6.64	6.64	6.64	6.64	6.64	6.64
hsa-miR-617	6.64	6.64	6.64	6.64	6.64	6.64	6.64	6.64	6.64	6.64
hsa-miR-619-3p	6.64	6.64	6.64	6.64	6.64	6.64	6.64	6.64	6.64	6.64
hsa-miR-620	6.64	6.64	6.64	6.64	6.64	6.64	6.64	6.64	6.64	6.64
hsa-miR-624-3p	6.64	6.64	6.64	6.64	6.64	6.64	6.64	6.64	6.64	6.64
hsa-miR-625-5p	6.64	6.64	6.64	6.64	6.64	6.64	6.64	6.64	6.64	6.64
hsa-miR-626	6.64	6.64	6.64	6.64	6.64	6.64	6.64	6.64	6.64	6.64
hsa-miR-627-3p	6.64	6.64	6.64	6.64	6.64	6.64	6.64	6.64	6.64	6.64
hsa-miR-627-5p	6.64	6.64	6.64	6.64	6.64	6.64	6.64	6.64	6.64	6.64
hsa-miR-628-3p	6.64	6.64	6.64	6.64	6.64	6.64	6.64	6.64	6.64	6.64
hsa-miR-628-5p	6.64	6.64	6.64	6.64	6.64	6.64	6.64	6.64	6.64	6.64
hsa-miR-629-5p	6.64	6.64	6.64	6.64	6.64	6.64	6.64	6.64	6.64	6.64
hsa-miR-630	6.64	6.64	6.64	6.64	6.64	6.64	6.64	6.64	6.64	6.64
hsa-miR-631	6.64	6.64	6.64	6.64	6.64	6.64	6.64	6.64	6.64	6.64
hsa-miR-637	6.64	6.64	6.64	6.64	6.64	6.64	6.64	6.64	6.64	6.64
hsa-miR-638	6.64	6.64	6.64	6.64	6.64	6.64	6.64	6.64	6.64	6.64
hsa-miR-639	6.64	6.64	6.64	6.64	6.64	6.64	6.64	6.64	6.64	6.64
hsa-miR-640	6.64	6.64	6.64	6.64	6.64	6.64	6.64	6.64	6.64	6.64
hsa-miR-641	6.64	6.64	6.64	6.64	6.64	6.64	6.64	6.64	6.64	6.64
hsa-miR-642a-3p	6.64	6.64	6.64	6.64	6.64	6.64	6.64	6.64	6.64	6.64
hsa-miR-642a-5p	6.64	6.64	6.64	6.64	6.64	6.64	6.64	6.64	6.64	6.64
hsa-miR-643	6.64	6.64	6.64	6.64	6.64	6.64	6.64	6.64	6.64	6.64
hsa-miR-644a	8.12	8.47	7.72	8.86	8.22	8.69	9	9.11	9.25	9.69
hsa-miR-648	6.64	6.64	6.64	6.64	6.64	6.64	6.64	6.64	6.64	6.64
hsa-miR-649	6.64	6.64	6.64	6.64	6.64	6.64	6.64	6.64	6.64	6.64
hsa-miR-650	6.64	6.64	6.64	6.64	6.64	6.64	6.64	6.64	6.64	6.64
hsa-miR-6503-3p	6.64	6.64	6.64	6.64	6.64	6.64	6.64	6.64	6.64	6.64
hsa-miR-6503-5p	6.64	6.64	6.64	6.64	6.64	6.64	6.64	6.64	6.64	6.64
hsa-miR-651-3p	6.64	6.64	6.64	6.64	6.64	6.64	6.64	6.64	6.64	6.64
hsa-miR-651-5p	6.64	6.64	6.64	6.64	6.64	6.64	6.64	6.64	6.64	6.64
hsa-miR-6511a-3p	6.64	6.64	6.64	6.64	6.64	6.64	6.64	6.64	6.64	6.64
hsa-miR-6511a-5p	6.64	6.64	6.64	6.64	6.64	6.64	6.64	6.64	6.64	6.64
hsa-miR-652-3p	6.64	6.64	6.64	6.64	6.64	6.64	6.64	6.64	6.64	6.64
hsa-miR-652-5p	6.64	6.64	6.64	6.64	6.64	6.64	6.64	6.64	6.64	6.64
hsa-miR-654-3p	6.64	6.64	6.64	6.64	6.64	6.64	6.64	6.64	6.64	6.64
hsa-miR-654-5p	6.64	6.64	6.64	6.64	6.64	6.64	6.64	6.64	6.64	6.64
hsa-miR-655-3p	6.64	6.64	6.64	6.64	6.64	6.64	6.64	6.64	6.64	6.64
hsa-miR-656-3p	6.64	6.64	6.64	6.64	6.64	6.64	6.64	6.64	6.64	6.64
hsa-miR-660-3p	6.64	6.64	6.64	6.64	6.64	6.64	6.64	6.64	6.64	6.64
hsa-miR-660-5p	6.64	6.64	6.64	6.64	6.64	6.64	6.64	6.64	6.64	6.64
hsa-miR-661	6.64	6.64	6.64	6.64	6.64	6.64	6.64	6.64	6.64	6.64
hsa-miR-663a	6.64	6.64	6.64	6.64	6.64	6.64	6.64	6.64	6.64	6.64
hsa-miR-664a-3p	6.64	6.64	6.64	6.64	6.64	6.64	6.64	6.64	6.64	6.64
hsa-miR-664b-3p	6.64	6.64	6.64	6.64	6.64	6.64	6.64	6.64	6.64	6.64
hsa-miR-664b-5p	6.64	6.64	6.64	6.64	6.64	6.64	6.64	6.64	6.64	6.64
hsa-miR-665	6.64	6.64	6.64	6.64	6.64	6.64	6.64	6.64	6.64	6.64
hsa-miR-671-3p	6.64	6.64	6.64	6.64	6.64	6.64	6.64	6.64	6.64	6.64
hsa-miR-671-5p	6.64	6.64	6.64	6.64	6.64	6.64	6.64	6.64	6.64	6.64
hsa-miR-6720-3p	6.64	6.64	6.64	6.64	6.64	6.64	6.64	6.64	6.64	6.64
hsa-miR-6721-5p	6.64	6.64	6.64	6.99	6.93	7.28	7.7	7.55	7.74	6.64
hsa-miR-6724-5p	6.64	6.64	6.64	6.64	6.64	6.64	6.64	6.64	6.64	6.64
hsa-miR-675-5p	6.64	6.64	6.64	6.64	6.64	6.64	6.64	6.64	6.64	6.64
hsa-miR-7-5p	6.64	6.64	6.64	6.64	6.64	6.64	6.64	6.64	6.64	6.64
hsa-miR-708-5p	6.64	6.64	6.64	6.64	6.64	6.64	6.64	6.64	6.64	6.64
hsa-miR-744-5p	6.64	6.64	6.64	6.64	6.64	6.64	6.64	6.64	6.64	6.64
hsa-miR-758-3p+hsa-miR-411-3p	6.64	6.64	6.64	6.64	6.64	6.64	6.64	6.64	6.64	6.64
hsa-miR-758-5p	6.64	6.64	6.64	6.64	6.64	6.64	6.64	6.64	6.64	6.64
hsa-miR-760	6.64	6.64	6.64	6.64	6.64	6.64	6.64	6.64	6.64	6.64
hsa-miR-761	6.64	6.64	6.64	6.64	6.64	6.64	6.64	6.64	6.64	6.64
hsa-miR-764	6.64	6.64	6.64	6.64	6.64	6.64	6.64	6.64	6.64	6.64
hsa-miR-765	6.64	6.64	6.64	6.64	6.64	6.64	6.64	6.64	6.64	6.64
hsa-miR-766-3p	6.64	6.64	6.64	6.64	6.64	6.64	6.64	6.64	6.64	6.64
hsa-miR-766-5p	6.64	6.64	6.64	6.64	6.64	6.64	6.64	6.64	6.64	6.64
hsa-miR-767-3p	6.64	6.64	6.64	6.64	6.64	6.64	6.64	6.64	6.64	6.64
hsa-miR-767-5p	6.64	6.64	6.64	6.64	6.64	6.64	6.64	6.64	6.64	6.64
hsa-miR-769-3p	6.64	6.64	6.64	6.64	6.64	6.64	6.64	6.64	6.64	6.64
hsa-miR-769-5p	6.64	6.64	6.64	6.64	6.64	6.64	6.64	6.64	6.64	6.64
hsa-miR-770-5p	6.64	6.64	6.64	6.64	6.64	6.64	6.64	6.64	6.64	6.64
hsa-miR-802	6.64	6.64	6.64	6.64	6.64	6.64	6.64	6.64	6.64	6.64
hsa-miR-873-3p	6.64	6.64	6.64	6.64	6.81	7.09	7.15	7.28	6.64	6.64
hsa-miR-873-5p	6.64	6.64	6.64	6.64	6.64	6.64	6.64	6.64	6.64	6.64
hsa-miR-874-3p	6.64	6.64	6.64	6.64	6.64	6.64	6.64	6.64	6.64	6.64
hsa-miR-874-5p	6.64	6.64	6.64	6.64	6.64	6.64	6.64	6.64	6.64	6.64
hsa-miR-875-3p	6.64	6.64	6.64	6.64	6.64	6.64	6.64	6.64	6.64	6.64
hsa-miR-876-3p	6.64	6.64	6.64	6.64	6.64	6.64	6.64	6.64	6.64	6.64
hsa-miR-876-5p	6.64	6.64	6.64	6.64	6.64	6.64	6.64	6.64	6.64	6.64
hsa-miR-877-5p	6.64	6.64	6.64	6.64	6.64	6.64	6.64	6.64	6.64	6.64
hsa-miR-885-3p	6.64	6.64	6.64	6.64	6.64	6.64	6.64	6.64	6.64	6.64
hsa-miR-885-5p	6.64	6.64	6.64	6.64	6.64	6.64	6.64	6.64	6.64	6.64
hsa-miR-887-3p	6.64	6.64	6.64	6.64	6.64	6.64	6.64	6.64	6.64	6.64
hsa-miR-887-5p	6.64	6.64	6.64	6.64	6.64	6.64	6.64	6.64	6.64	6.64
hsa-miR-888-5p	6.64	6.64	6.64	6.64	6.64	6.64	6.64	6.64	6.64	6.64
hsa-miR-889-3p	6.64	6.64	6.64	6.64	6.64	6.64	6.64	6.64	6.64	6.64
hsa-miR-890	6.64	6.64	6.64	6.64	6.64	6.64	6.64	6.64	6.64	6.64
hsa-miR-891a-5p	6.64	6.64	6.64	6.64	6.64	6.64	6.64	6.64	6.64	6.64
hsa-miR-891b	6.64	6.64	6.64	6.64	6.64	6.64	6.64	6.64	6.64	6.64
hsa-miR-892a	6.64	6.64	6.64	6.64	6.64	6.64	6.64	6.64	6.64	6.64
hsa-miR-892b	6.64	6.64	6.64	6.64	6.64	6.64	6.64	6.64	6.64	6.64
hsa-miR-9-5p	6.64	6.64	6.64	6.64	6.64	6.64	6.64	6.64	6.64	6.64
hsa-miR-922	6.64	6.64	6.64	6.64	6.64	6.64	6.64	6.64	6.64	6.64
hsa-miR-924	6.64	6.64	6.64	6.64	6.64	6.64	6.64	6.64	6.64	6.64
hsa-miR-92a-1-5p	6.64	6.64	6.64	6.64	6.64	6.64	6.64	6.64	6.64	6.64
hsa-miR-92a-3p	6.64	6.64	6.64	6.64	6.64	6.64	6.64	6.64	6.64	6.64
hsa-miR-92b-3p	6.64	6.64	6.64	6.64	6.64	6.64	6.64	6.64	6.64	6.64
hsa-miR-93-5p	6.64	6.64	6.64	6.64	6.64	6.64	6.64	6.64	6.64	6.64
hsa-miR-933	6.64	6.64	6.64	6.64	6.64	6.64	6.64	6.64	6.64	6.64
hsa-miR-934	6.64	6.64	6.64	6.64	6.64	6.64	6.64	6.64	6.64	6.64
hsa-miR-935	6.64	6.64	6.64	6.64	6.64	6.64	6.64	6.64	6.64	6.64
hsa-miR-936	6.64	6.64	6.64	6.64	6.64	6.64	6.64	6.64	6.64	6.64
hsa-miR-937-3p	6.64	6.64	6.64	6.64	6.64	6.64	6.64	6.64	6.64	6.64
hsa-miR-939-5p	6.64	6.64	6.64	6.64	6.64	6.64	6.64	6.64	6.64	6.64
hsa-miR-940	6.64	6.64	6.64	6.64	6.64	6.64	6.64	6.64	6.64	6.64
hsa-miR-941	6.64	6.64	6.64	6.64	6.64	6.64	6.64	6.64	6.64	6.64
hsa-miR-942-3p	6.64	6.64	6.64	6.64	6.64	6.64	6.64	6.64	6.64	6.64
hsa-miR-942-5p	6.64	6.64	6.64	6.64	6.64	6.64	6.64	6.64	6.64	6.64
hsa-miR-944	6.64	6.64	6.64	6.64	6.64	6.64	6.64	6.64	6.64	6.64
hsa-miR-95-3p	6.64	6.64	6.64	6.64	6.64	6.64	6.64	6.64	6.64	6.64
hsa-miR-96-5p	6.64	6.64	6.64	6.64	6.64	6.64	6.64	6.64	6.64	6.64
hsa-miR-98-3p	6.64	6.64	6.64	6.64	6.64	6.64	6.64	6.64	6.64	6.64
hsa-miR-98-5p	6.64	6.64	6.64	6.64	6.64	6.64	6.64	6.64	6.64	6.64
hsa-miR-99a-5p	6.64	6.64	6.64	6.64	6.64	6.64	6.64	6.64	6.64	6.64
hsa-miR-99b-5p	6.64	6.64	6.64	6.64	6.64	6.64	6.64	6.64	6.64	6.64
ACTB	6.64	6.64	6.64	6.64	6.64	6.64	6.64	6.64	6.64	6.64
B2M	6.64	6.64	6.64	6.64	6.64	6.64	6.64	6.64	6.64	6.64
GAPDH	6.64	6.64	6.64	6.64	6.64	6.64	6.64	6.64	6.64	6.64
RPL19	6.64	6.64	6.64	6.64	6.64	6.64	6.64	6.64	6.64	6.64
RPLP0	6.64	6.64	6.64	6.64	6.64	6.64	6.64	6.64	6.64	6.64
LIG_NEG_A	6.64	6.64	6.64	6.64	6.64	6.64	6.64	6.64	6.64	6.64
LIG_NEG_B	6.64	6.64	6.64	6.64	6.64	6.64	6.64	6.64	6.64	6.64
LIG_NEG_C	6.64	6.64	6.64	6.64	6.64	6.64	6.64	6.64	6.64	6.64
LIG_POS_A	12.64	13.03	12.76	13.38	12.1	12.69	12.97	12.84	12.72	13.04
LIG_POS_B	10.96	11.44	10.96	11.84	10.82	11.28	11.5	11.29	11.36	11.72
LIG_POS_C	8.28	8.66	8.4	9.17	8.03	8.67	9.06	8.82	8.92	9.26
NEG_A	4.81	3.91	4.17	4.25	4.09	4.46	4.46	4.58	3.58	4.17
NEG_B	3.7	4.09	4.09	4.25	3.46	4.75	4.17	4.25	3.7	3.46
NEG_C	6.44	6.07	6.23	6.71	6.51	6.78	6.78	6.91	6.07	6.15
NEG_D	4.32	4.46	4.39	5.04	4.64	4.91	5.25	5.17	4.81	4.64
NEG_E	4.32	4	3.91	4.52	4.86	4.39	4.75	4.52	4.32	4.09
NEG_F	4.52	4.52	4.91	5.43	4.39	4.95	4.95	4.32	4.7	4.32
NEG_G	4.17	4.09	3.46	3.91	4	3.91	2.81	3.32	4	3.7
NEG_H	4.09	4.09	3.7	4.75	3.81	4.39	4.17	4.09	4.17	3.58
POS_A	14.3	13.94	14.43	14.48	14.45	14.76	14.73	14.62	14.19	13.99
POS_B	12.85	12.53	13.04	13.09	13.02	13.38	13.3	13.22	12.71	12.47
POS_C	11.23	10.9	11.4	11.42	11.36	11.64	11.67	11.54	11.17	11
POS_D	8.88	8.48	8.78	9.06	9.03	9.29	9.25	9.17	8.86	8.57
POS_E	6.83	6.61	6.67	6.79	6.77	7	7.16	7.07	6.55	6.25
POS_F	6.02	5.32	6.09	6.44	6.43	6.43	6.13	6.36	6	5.58
ath-miR159a	6.64	6.64	6.64	6.64	6.64	6.64	6.64	6.64	6.64	6.64
cel-miR-248	6.64	6.64	6.64	6.64	6.64	6.64	6.64	6.64	6.64	6.64
cel-miR-254	9.78	9.78	9.78	9.78	9.78	9.78	9.78	9.78	9.78	9.78
osa-miR414	6.64	6.64	6.64	6.64	6.64	6.64	6.64	6.64	6.64	6.64
osa-miR442	6.64	6.64	6.64	6.64	6.64	6.64	6.64	6.64	6.64	6.64

## Sheet: Metadata Example
SERIES
title	Gene expression-based, individualized outcome prediction for surgically treated lung cancer patients
summary	Individualized outcome prediction classifiers were successfully constructed through expression profiling of a total of 8,644 genes in 50 non-small cell lung cancer (NSCLC) cases, which had been consecutively operated on within a defined short period of ti
overall design	In the study presented here, a consecutively operated, well-defined cohort of 50 NSCLC cases, followed up more than five years, was used to acquire expression profiles of a total of 8,644 unique genes, leading to the successful construction of supervised
contributor	Jane,Doe
contributor	John,A,Smith
SAMPLES
# The corresponding example matrix table is included in the next worksheet.
Sample name	title	raw data file	source name	organism	characteristics: Tissue	characteristics: Status after 5 years	characteristics: Histology	characteristics: Age	characteristics: Sex	characteristics: Stage	molecule	label	description	platform
GF200_001	Patient 1 GF200 001	GF200_001.txt	primary lung cancer	Homo sapiens	primary lung cancer	Alive	SQ	61 years	Male	IIB	total RNA	33P	Total genomic DNA was spotted on 192 spots for positive control. Nothing was spotted on 40 spot with the aim of negative control. Therefore, a total of 232 spot data were already eliminated from the whole 5584 spot data on the GF201 array.	GPL3694
GF200_002	Patient 2 GF200 002	GF200_002.txt	primary lung cancer	Homo sapiens	primary lung cancer	Dead	SQ	63 years	Male	IIIA	total RNA	33P	Total genomic DNA was spotted on 192 spots for positive control. Nothing was spotted on 40 spot with the aim of negative control. Therefore, a total of 232 spot data were already eliminated from the whole 5584 spot data on the GF201 array.	GPL3694
GF200_003	Patient 3 GF200 003	GF200_003.txt	primary lung cancer	Homo sapiens	primary lung cancer	Alive	LA	68 years	Male	IB	total RNA	33P	Total genomic DNA was spotted on 192 spots for positive control. Nothing was spotted on 40 spot with the aim of negative control. Therefore, a total of 232 spot data were already eliminated from the whole 5584 spot data on the GF201 array.	GPL3694
GF200_004	Patient 4 GF200 004	GF200_004.txt	primary lung cancer	Homo sapiens	primary lung cancer	Dead	AD	71 years	Male	IB	total RNA	33P	Total genomic DNA was spotted on 192 spots for positive control. Nothing was spotted on 40 spot with the aim of negative control. Therefore, a total of 232 spot data were already eliminated from the whole 5584 spot data on the GF201 array.	GPL3694
GF200_005	Patient 5 GF200 005	GF200_005.txt	primary lung cancer	Homo sapiens	primary lung cancer	Alive	AD	49 years	Female	IA	total RNA	33P	Total genomic DNA was spotted on 192 spots for positive control. Nothing was spotted on 40 spot with the aim of negative control. Therefore, a total of 232 spot data were already eliminated from the whole 5584 spot data on the GF201 array.	GPL3694
GF200_006	Patient 6 GF200 006	GF200_006.txt	primary lung cancer	Homo sapiens	primary lung cancer	Dead	AD	51 years	Female	IIIA	total RNA	33P	Total genomic DNA was spotted on 192 spots for positive control. Nothing was spotted on 40 spot with the aim of negative control. Therefore, a total of 232 spot data were already eliminated from the whole 5584 spot data on the GF201 array.	GPL3694
GF200_007	Patient 7 GF200 007	GF200_007.txt	primary lung cancer	Homo sapiens	primary lung cancer	Alive	AD	51 years	Female	IIA	total RNA	33P	Total genomic DNA was spotted on 192 spots for positive control. Nothing was spotted on 40 spot with the aim of negative control. Therefore, a total of 232 spot data were already eliminated from the whole 5584 spot data on the GF201 array.	GPL3694
GF200_008	Patient 8 GF200 008	GF200_008.txt	primary lung cancer	Homo sapiens	primary lung cancer	Dead	AD	67 years	Female	IIIA	total RNA	33P	Total genomic DNA was spotted on 192 spots for positive control. Nothing was spotted on 40 spot with the aim of negative control. Therefore, a total of 232 spot data were already eliminated from the whole 5584 spot data on the GF201 array.	GPL3694
GF200_009	Patient 9 GF200 009	GF200_009.txt	primary lung cancer	Homo sapiens	primary lung cancer	Alive	AD	52 years	Male	IIIA	total RNA	33P	Total genomic DNA was spotted on 192 spots for positive control. Nothing was spotted on 40 spot with the aim of negative control. Therefore, a total of 232 spot data were already eliminated from the whole 5584 spot data on the GF201 array.	GPL3694
GF200_010	Patient 10 GF200 010	GF200_010.txt	primary lung cancer	Homo sapiens	primary lung cancer	Alive	LA	69 years	Male	IIA	total RNA	33P	Total genomic DNA was spotted on 192 spots for positive control. Nothing was spotted on 40 spot with the aim of negative control. Therefore, a total of 232 spot data were already eliminated from the whole 5584 spot data on the GF201 array.	GPL3694
PROTOCOLS
extract protocol	On average, 50 7 um-thick cryostat sections were prepared for the extraction of total RNA from tumor cell-rich areas, which were identified by a surgical pathologist (YY) using every 10th section stained by May-Giemsa. Careful attention was paid to the mi
label protocol	Five mg of total RNA was reverse-transcribed using oligo-dT primers (Invitrogen) and SuperScript II reverse transcriptase (Invitrogen) in the presence of 100 mCi of [33P]dCTP (Amersham Bioscience, Piscataway, NJ) according to the instructions for the Gene
hyb protocol	The GeneFilters were prehybridized for 2 h at 51C with 0.5 mg/ml of poly-dA (Invitrogen) and 0.5 mg/ml Cot-1 DNA (Invitrogen) in 10 ml of AlkPhos DIRECT hybridization buffer (Amersham Bioscience) and then hybridized for 17 h at 51C with the denatured radi
scan protocol	The arrays were then exposed for 2 hours to an Imaging Plate and scanned at 25-mm resolution with a BAS5000 phosphoimager (Fuji Photo Film), images of the hybridized arrays were processed with L Process (Fuji Photo Film) and signal intensities quantified
data processing	The raw data were re-scaled to account for the differences in individual hybridization intensities. We employed a rank-invariant scaling method to select genes (Tseng et al., 2001), which were then used for fitting of a non-linear normalization curve. A
value definition	Normalized signal intensity

## Sheet: Matrix Example
# truncated example of a matrix table
ID REF	GF200_001	GF200_002	GF200_003	GF200_004	GF200_005	GF200_006	GF200_007	GF200_008	GF200_009	GF200_010
8	1.856	1.320	1.100	5.132	2.893	1.629	0.623	4.324	0.811	1.033
9	173.711	163.516	199.105	171.180	181.289	194.333	169.150	176.541	190.919	199.860
10	2.564	2.936	1.611	1.895	1.693	1.598	1.420	1.406	1.648	2.120
11	0.951	0.682	0.250	0.795	0.388	0.467	0.146	0.377	0.172	0.411
12	0.176	0.142	0.024	0.169	0.132	0.170	0.040	0.148	0.043	0.144
13	1.359	1.271	0.475	1.799	1.111	1.931	0.662	1.962	0.908	0.919
14	13.028	17.314	16.810	9.780	13.919	11.375	18.059	17.410	12.921	11.815
15	0.445	0.331	0.144	0.443	0.399	0.279	0.202	0.417	0.184	0.263
16	1.705	1.204	1.354	1.550	0.908	1.262	0.642	2.124	1.430	0.797
17	1.089	1.269	0.624	3.147	2.214	2.970	2.136	1.783	1.916	0.469
18	0.314	0.108	0.025	0.339	0.122	0.355	0.048	0.270	0.059	0.068
19	5.633	1.787	1.230	1.207	6.912	1.339	4.087	5.483	2.201	0.804
26	0.358	0.075	0.059	0.166	0.287	0.196	0.082	0.241	0.061	0.122
27	0.367	0.117	0.058	0.414	0.210	0.211	0.077	0.258	0.044	0.261
28	0.294	0.143	0.061	0.245	0.275	0.299	0.051	0.176	0.047	0.127
29	0.329	0.159	0.036	0.287	0.168	0.150	0.053	0.229	0.030	0.119
30	0.434	0.156	0.092	0.157	0.137	0.203	0.042	0.171	0.064	0.118
31	0.892	0.485	0.156	0.836	0.468	0.516	0.206	0.915	0.238	0.355
32	0.345	0.139	0.059	0.426	0.536	0.184	0.067	0.373	0.110	0.201
33	1.444	1.044	0.583	1.487	1.437	0.823	0.891	1.161	0.964	0.988
34	1.409	2.316	1.128	0.851	0.960	0.947	1.207	1.288	0.861	0.748
35	0.182	0.301	0.078	0.205	0.281	0.113	0.037	0.177	0.053	0.074
36	2.730	1.035	0.562	3.603	1.753	1.751	0.593	1.151	0.694	0.780
37	8.585	14.840	6.292	7.560	8.310	13.421	8.744	10.692	10.479	12.375
38	0.534	39.018	0.275	3.106	0.395	0.561	0.251	0.650	0.263	0.451
39	0.292	0.744	0.059	0.324	0.260	0.209	0.118	0.325	0.074	0.135
40	0.452	0.922	0.472	0.718	0.532	0.288	0.121	0.440	0.102	0.182
41	1.889	0.747	0.364	1.841	1.773	4.075	1.256	0.917	0.759	0.359
42	0.964	0.610	0.171	0.730	0.512	0.772	0.375	0.534	0.247	0.266
43	0.777	0.234	0.218	0.428	0.506	0.297	0.144	0.435	0.202	0.126
44	0.397	0.468	0.369	0.553	0.622	0.345	0.330	0.502	0.311	0.360
45	0.303	0.198	0.301	0.234	0.207	0.288	0.141	0.207	0.135	0.120
46	0.280	0.105	0.077	0.241	0.109	0.152	0.043	0.227	0.100	0.072
47	0.269	0.078	0.026	0.113	0.095	0.156	0.026	0.231	0.040	0.059
48	1.064	0.635	0.347	0.480	0.659	0.874	0.109	0.820	0.303	0.405
49	0.680	0.144	0.170	0.265	0.215	0.568	0.120	0.233	0.193	0.116
50	0.197	0.162	0.044	0.153	0.237	0.195	0.058	0.187	0.069	0.099
