# Supplementary material for: Vitamin C supplementation reduces expression of circulating miR-451a in subjects with poorly controlled type 2 diabetes mellitus and high oxidative stress
Source: PeerJ journal article supplement (doi:10.7717/peerj.10776), 2021-02-04
Supplement: GEO_LR.zip [file miRNA raw data_NS_H_MIR_V3A_5N.xlsx]

## Sheet: NS_H_MIR_V3A raw data
RCC File Name			20180207_30101949610218-01_SN15AF_06.RCC	20180207_30101949610218-01_SN15BF_05.RCC	20180207_30101949610218-01_SN16AF_04.RCC	20180207_30101949610218-01_SN16BF_03.RCC	20180207_30101949610218-01_SN18AF_08.RCC	20180207_30101949610218-01_SN18BF_07.RCC	20180207_30101949610218-01_SN20AF_10.RCC	20180207_30101949610218-01_SN20BF_09.RCC	20180207_30101949610218-01_SN22AF_12.RCC	20180207_30101949610218-01_SN22BF_11.RCC
Title (treatment)			Post-vitC	Pre-vitC	Post-vitC	Pre-vitC	Post-vitC	Pre-vitC	Post-vitC	Pre-vitC	Post-vitC	Pre-vitC
Sample name (ID)			SN15AF	SN15BF	SN16AF	SN16BF	SN18AF	SN18BF	SN20AF	SN20BF	SN22AF	SN22BF
Owner			Administrator	Administrator	Administrator	Administrator	Administrator	Administrator	Administrator	Administrator	Administrator	Administrator
Sample Date			2561-06-02	2561-06-02	2561-06-02	2561-06-02	2561-06-02	2561-06-02	2561-06-02	2561-06-02	2561-06-02	2561-06-02
File Version			2	2	2	2	2	2	2	2	2	2
Gene RLF			NS_H_MIR_V3A	NS_H_MIR_V3A	NS_H_MIR_V3A	NS_H_MIR_V3A	NS_H_MIR_V3A	NS_H_MIR_V3A	NS_H_MIR_V3A	NS_H_MIR_V3A	NS_H_MIR_V3A	NS_H_MIR_V3A
Lane ID			6	5	4	3	8	7	10	9	12	11
FOV Count			194	194	194	194	194	194	194	194	194	194
FOV Counted			192	194	192	192	193	194	194	192	190	194
Scanner ID			1604P0087	1604P0087	1604P0087	1604P0087	1604P0087	1604P0087	1604P0087	1604P0087	1604P0087	1604P0087
Stage Position			1	1	1	1	1	1	1	1	1	1
Binding Density			0.27	0.35	0.37	0.28	0.31	0.26	0.31	0.34	0.25	0.3
Messages			25	32	25	33	21	20	23	26	19	19
Positive	POS_A	ERCC_00117.1	15720	20120	22841	22082	27656	22433	25232	27093	16226	18681
Positive	POS_B	ERCC_00112.1	5932	7359	8743	8431	10666	8312	9548	10070	5664	6700
Positive	POS_C	ERCC_00002.1	1917	2410	2743	2694	3193	2626	2983	3256	2043	2311
Positive	POS_D	ERCC_00092.1	358	471	532	440	626	523	576	607	380	464
Positive	POS_E	ERCC_00035.1	98	114	111	102	128	109	134	143	76	94
Positive	POS_F	ERCC_00034.1	40	65	87	68	86	86	82	70	48	64
Negative	NEG_A	ERCC_00096.1	15	28	19	18	22	17	24	22	18	12
Negative	NEG_B	ERCC_00041.1	17	13	19	17	27	11	19	18	11	13
Negative	NEG_C	ERCC_00019.1	67	87	105	75	110	91	120	110	71	67
Negative	NEG_D	ERCC_00076.1	22	20	33	21	30	25	36	38	25	28
Negative	NEG_E	ERCC_00098.1	16	20	23	15	21	29	23	27	17	20
Negative	NEG_F	ERCC_00126.1	23	23	43	30	31	21	20	31	20	26
Negative	NEG_G	ERCC_00144.1	17	18	15	11	15	16	10	7	13	16
Negative	NEG_H	ERCC_00154.1	17	17	27	13	21	14	17	18	12	18
Ligation	LIG_NEG_A	nmiR00810.1	3	12	15	23	21	10	22	28	7	10
Ligation	LIG_NEG_B	nmiR00828.1	16	21	32	21	33	32	28	45	11	18
Ligation	LIG_NEG_C	nmiR00803.1	12	19	15	21	23	19	16	22	21	12
Ligation	LIG_POS_A	nmiR00813.1	8738	11668	10724	11698	5390	3925	5848	6373	3386	3524
Ligation	LIG_POS_B	nmiR00809.1	2884	3634	3686	3356	2031	1619	1997	2303	1358	1380
Ligation	LIG_POS_C	nmiR00811.1	421	567	579	570	333	234	361	426	246	253
SpikeIn	ath-miR159a	MIMAT0000177	53	40	53	49	44	37	35	43	30	20
SpikeIn	cel-miR-248	MIMAT0000304	18	12	21	21	17	15	23	30	20	14
SpikeIn	cel-miR-254	MIMAT0000310	917	1605	885	1482	718	786	704	701	354	461
SpikeIn	osa-miR414	MIMAT0001330	30	31	40	33	37	28	36	44	16	26
SpikeIn	osa-miR442	MIMAT0001605	58	59	51	40	43	60	52	63	48	62
Endogenous1	hsa-let-7a-5p	MIMAT0000062	1	1	1	1	1	1	1	1	1	1
Endogenous1	hsa-let-7b-5p	MIMAT0000063	34	56	45	52	35	40	32	35	30	24
Endogenous1	hsa-let-7c-5p	MIMAT0000064	25	26	34	31	28	37	36	32	21	23
Endogenous1	hsa-let-7d-5p	MIMAT0000065	24	23	36	34	42	38	46	33	35	35
Endogenous1	hsa-let-7e-5p	MIMAT0000066	14	26	32	24	21	29	35	20	17	19
Endogenous1	hsa-let-7f-5p	MIMAT0000067	31	37	32	34	62	38	46	48	29	42
Endogenous1	hsa-let-7g-5p	MIMAT0000414	15	32	41	35	38	26	26	35	22	16
Endogenous1	hsa-let-7i-5p	MIMAT0000415	36	54	56	69	47	37	48	45	40	37
Endogenous1	hsa-miR-1-3p	MIMAT0000416	11	15	20	21	31	18	32	24	17	28
Endogenous1	hsa-miR-1-5p	MIMAT0031892	36	42	56	39	29	37	50	41	38	37
Endogenous1	hsa-miR-100-5p	MIMAT0000098	14	31	35	37	31	37	36	44	33	30
Endogenous1	hsa-miR-101-3p	MIMAT0000099	23	30	32	27	16	18	21	27	17	25
Endogenous1	hsa-miR-103a-3p	MIMAT0000101	31	34	36	25	32	24	43	24	25	22
Endogenous1	hsa-miR-105-5p	MIMAT0000102	44	37	38	28	36	37	32	43	33	33
Endogenous1	hsa-miR-106a-5p+hsa-miR-17-5p	MIMAT0000103	15	25	12	37	10	12	20	20	14	15
Endogenous1	hsa-miR-106b-5p	MIMAT0000680	16	23	26	17	19	15	20	19	15	18
Endogenous1	hsa-miR-107	MIMAT0000104	52	52	66	62	61	56	61	79	35	41
Endogenous1	hsa-miR-10a-5p	MIMAT0000253	21	26	26	26	24	23	21	35	28	31
Endogenous1	hsa-miR-10b-5p	MIMAT0000254	18	21	26	34	33	23	26	26	21	18
Endogenous1	hsa-miR-1178-3p	MIMAT0005823	16	28	28	23	30	23	30	18	24	24
Endogenous1	hsa-miR-1180-3p	MIMAT0005825	22	25	24	24	23	17	32	26	19	17
Endogenous1	hsa-miR-1183	MIMAT0005828	24	31	39	33	25	28	44	48	37	34
Endogenous1	hsa-miR-1185-1-3p	MIMAT0022838	28	25	25	33	26	27	22	31	30	26
Endogenous1	hsa-miR-1185-2-3p	MIMAT0022713	68	67	48	66	64	123	67	74	60	60
Endogenous1	hsa-miR-1185-5p	MIMAT0005798	21	23	49	21	33	39	42	36	21	30
Endogenous1	hsa-miR-1193	MIMAT0015049	8	19	21	15	25	18	18	25	9	13
Endogenous1	hsa-miR-1197	MIMAT0005955	31	63	52	45	53	44	65	69	34	38
Endogenous1	hsa-miR-1200	MIMAT0005863	13	10	18	13	24	20	29	25	15	20
Endogenous1	hsa-miR-1202	MIMAT0005865	19	31	31	31	50	24	32	34	31	22
Endogenous1	hsa-miR-1203	MIMAT0005866	26	21	31	20	32	27	35	37	25	24
Endogenous1	hsa-miR-1204	MIMAT0005868	27	20	12	27	24	25	24	22	19	15
Endogenous1	hsa-miR-1205	MIMAT0005869	24	28	24	20	36	22	37	37	22	26
Endogenous1	hsa-miR-1206	MIMAT0005870	75	46	51	67	84	121	53	85	53	65
Endogenous1	hsa-miR-122-5p	MIMAT0000421	324	610	155	167	143	162	151	203	137	94
Endogenous1	hsa-miR-1224-3p	MIMAT0005459	23	25	20	15	36	25	25	26	22	19
Endogenous1	hsa-miR-1224-5p	MIMAT0005458	18	22	17	20	19	13	24	26	10	19
Endogenous1	hsa-miR-1226-3p	MIMAT0005577	15	24	38	25	27	31	28	26	22	20
Endogenous1	hsa-miR-1228-3p	MIMAT0005583	28	30	28	23	31	25	32	30	20	26
Endogenous1	hsa-miR-1233-3p	MIMAT0005588	9	12	25	13	11	15	22	20	20	18
Endogenous1	hsa-miR-1234-3p	MIMAT0005589	28	21	37	26	36	23	32	38	18	25
Endogenous1	hsa-miR-1236-3p	MIMAT0005591	35	40	60	40	35	31	37	53	43	30
Endogenous1	hsa-miR-124-3p	MIMAT0000422	15	10	27	18	26	19	21	21	13	22
Endogenous1	hsa-miR-1244	MIMAT0005896	24	32	24	26	30	32	30	31	24	24
Endogenous1	hsa-miR-1245a	MIMAT0005897	10	20	23	21	29	17	20	25	15	13
Endogenous1	hsa-miR-1245b-3p	MIMAT0019951	22	15	18	24	23	27	32	33	17	23
Endogenous1	hsa-miR-1245b-5p	MIMAT0019950	34	37	44	32	39	42	55	43	31	32
Endogenous1	hsa-miR-1246	MIMAT0005898	76	64	34	20	1	1	2	3	71	20
Endogenous1	hsa-miR-1247-5p	MIMAT0005899	10	17	11	14	13	8	16	16	8	13
Endogenous1	hsa-miR-1248	MIMAT0005900	13	24	31	16	34	17	27	32	15	21
Endogenous1	hsa-miR-1249-3p	MIMAT0005901	11	33	30	23	31	25	31	30	17	26
Endogenous1	hsa-miR-1249-5p	MIMAT0032029	15	18	23	17	23	20	24	28	14	20
Endogenous1	hsa-miR-1250-5p	MIMAT0005902	19	21	11	22	23	26	27	23	13	16
Endogenous1	hsa-miR-1252-5p	MIMAT0005944	24	25	29	24	23	25	27	22	24	32
Endogenous1	hsa-miR-1253	MIMAT0005904	846	1042	934	706	489	372	741	712	852	600
Endogenous1	hsa-miR-1254	MIMAT0005905	17	23	27	15	33	27	27	24	21	20
Endogenous1	hsa-miR-1255a	MIMAT0005906	58	44	43	28	54	72	41	46	46	65
Endogenous1	hsa-miR-1255b-5p	MIMAT0005945	33	37	40	46	33	37	40	46	37	30
Endogenous1	hsa-miR-1257	MIMAT0005908	51	76	70	53	57	42	60	58	50	39
Endogenous1	hsa-miR-1258	MIMAT0005909	30	46	51	51	69	43	52	49	31	42
Endogenous1	hsa-miR-125a-3p	MIMAT0004602	18	24	44	34	41	24	32	35	23	21
Endogenous1	hsa-miR-125a-5p	MIMAT0000443	18	24	17	33	16	26	22	24	9	28
Endogenous1	hsa-miR-125b-5p	MIMAT0000423	20	58	32	35	44	27	31	23	18	23
Endogenous1	hsa-miR-126-3p	MIMAT0000445	35	35	30	100	30	25	30	27	19	19
Endogenous1	hsa-miR-1260a	MIMAT0005911	21	33	27	19	28	19	28	30	16	23
Endogenous1	hsa-miR-1260b	MIMAT0015041	23	15	24	65	18	22	22	24	12	17
Endogenous1	hsa-miR-1261	MIMAT0005913	22	32	45	27	44	37	31	45	36	30
Endogenous1	hsa-miR-1262	MIMAT0005914	20	31	24	30	18	26	31	34	20	20
Endogenous1	hsa-miR-1264	MIMAT0005791	27	26	30	25	41	29	43	37	25	29
Endogenous1	hsa-miR-1266-5p	MIMAT0005920	15	16	36	33	33	26	27	26	21	17
Endogenous1	hsa-miR-1268a	MIMAT0005922	18	37	28	21	31	27	42	27	15	26
Endogenous1	hsa-miR-1268b	MIMAT0018925	22	42	42	30	42	39	39	58	26	36
Endogenous1	hsa-miR-1269a	MIMAT0005923	30	28	45	29	37	32	39	41	39	29
Endogenous1	hsa-miR-1269b	MIMAT0019059	26	17	23	19	13	36	17	26	17	27
Endogenous1	hsa-miR-127-3p	MIMAT0000446	31	30	36	31	45	40	42	42	30	39
Endogenous1	hsa-miR-127-5p	MIMAT0004604	21	29	27	16	35	35	24	36	17	21
Endogenous1	hsa-miR-1270	MIMAT0005924	24	32	35	25	30	30	42	32	33	31
Endogenous1	hsa-miR-1271-3p	MIMAT0022712	21	32	47	32	42	33	36	33	13	35
Endogenous1	hsa-miR-1271-5p	MIMAT0005796	23	42	43	32	36	31	37	34	29	45
Endogenous1	hsa-miR-1272	MIMAT0005925	32	30	33	29	24	26	40	31	23	26
Endogenous1	hsa-miR-1273c	MIMAT0015017	21	49	33	34	44	42	51	35	19	36
Endogenous1	hsa-miR-1275	MIMAT0005929	15	14	26	15	14	16	22	16	13	17
Endogenous1	hsa-miR-1276	MIMAT0005930	28	33	42	32	39	39	26	41	18	28
Endogenous1	hsa-miR-1277-3p	MIMAT0005933	33	27	35	44	63	75	47	42	44	38
Endogenous1	hsa-miR-1278	MIMAT0005936	25	28	28	25	34	20	33	33	21	28
Endogenous1	hsa-miR-1279	MIMAT0005937	41	54	54	37	41	46	44	66	47	35
Endogenous1	hsa-miR-128-1-5p	MIMAT0026477	25	17	31	26	22	21	21	26	19	18
Endogenous1	hsa-miR-128-2-5p	MIMAT0031095	16	13	22	27	21	14	32	31	22	17
Endogenous1	hsa-miR-128-3p	MIMAT0000424	1	1	1	1	1	1	1	1	1	1
Endogenous1	hsa-miR-1281	MIMAT0005939	17	13	20	23	14	16	21	22	10	16
Endogenous1	hsa-miR-1283	MIMAT0005799	1	1	1	1	1	1	1	1	1	1
Endogenous1	hsa-miR-1285-3p	MIMAT0005876	14	30	31	24	30	31	16	23	28	13
Endogenous1	hsa-miR-1285-5p	MIMAT0022719	47	56	70	51	56	55	51	51	40	45
Endogenous1	hsa-miR-1286	MIMAT0005877	34	42	44	43	59	52	66	56	32	41
Endogenous1	hsa-miR-1287-3p	MIMAT0026738	10	18	19	25	20	18	23	23	12	28
Endogenous1	hsa-miR-1287-5p	MIMAT0005878	21	28	19	25	34	27	25	22	20	23
Endogenous1	hsa-miR-1288-3p	MIMAT0005942	13	12	25	13	21	15	17	32	8	17
Endogenous1	hsa-miR-1289	MIMAT0005879	18	34	27	25	29	27	28	34	11	14
Endogenous1	hsa-miR-129-2-3p	MIMAT0004605	26	28	19	31	37	27	31	38	24	31
Endogenous1	hsa-miR-129-5p	MIMAT0000242	8	11	10	11	18	15	22	17	14	14
Endogenous1	hsa-miR-1290	MIMAT0005880	212	194	127	155	157	119	178	178	239	171
Endogenous1	hsa-miR-1291	MIMAT0005881	13	17	28	18	35	30	35	28	21	13
Endogenous1	hsa-miR-1293	MIMAT0005883	14	39	42	27	22	33	26	31	17	22
Endogenous1	hsa-miR-1295a	MIMAT0005885	25	39	30	33	34	24	34	44	32	34
Endogenous1	hsa-miR-1296-3p	MIMAT0026637	18	30	37	31	27	21	29	26	26	23
Endogenous1	hsa-miR-1296-5p	MIMAT0005794	11	12	24	15	19	25	25	25	13	19
Endogenous1	hsa-miR-1297	MIMAT0005886	89	64	63	66	67	52	79	80	83	93
Endogenous1	hsa-miR-1298-5p	MIMAT0005800	11	29	32	25	32	25	32	28	23	23
Endogenous1	hsa-miR-1299	MIMAT0005887	24	32	25	26	37	32	17	27	21	19
Endogenous1	hsa-miR-1301-3p	MIMAT0005797	10	9	14	15	18	14	15	16	6	10
Endogenous1	hsa-miR-1302	MIMAT0005890	12	22	32	18	18	26	25	32	16	15
Endogenous1	hsa-miR-1303	MIMAT0005891	10	11	24	20	18	15	28	17	10	17
Endogenous1	hsa-miR-1304-3p	MIMAT0022720	10	14	17	13	19	19	22	19	14	15
Endogenous1	hsa-miR-1304-5p	MIMAT0005892	26	41	31	30	38	31	24	37	24	33
Endogenous1	hsa-miR-1305	MIMAT0005893	50	67	67	57	58	45	44	63	47	55
Endogenous1	hsa-miR-1306-3p	MIMAT0005950	26	36	31	22	27	38	33	40	28	32
Endogenous1	hsa-miR-1306-5p	MIMAT0022726	21	26	26	27	31	20	28	27	16	15
Endogenous1	hsa-miR-1307-3p	MIMAT0005951	22	19	28	25	28	24	35	43	15	37
Endogenous1	hsa-miR-1307-5p	MIMAT0022727	31	29	39	35	46	35	54	39	27	26
Endogenous1	hsa-miR-130a-3p	MIMAT0000425	29	39	25	98	29	32	27	28	13	24
Endogenous1	hsa-miR-130b-3p	MIMAT0000691	15	24	20	28	30	20	23	27	17	24
Endogenous1	hsa-miR-132-3p	MIMAT0000426	11	16	17	19	27	21	27	27	11	19
Endogenous1	hsa-miR-1322	MIMAT0005953	29	45	34	43	29	23	34	48	26	24
Endogenous1	hsa-miR-1323	MIMAT0005795	41	39	43	39	40	33	41	43	35	24
Endogenous1	hsa-miR-133a-3p	MIMAT0000427	21	24	35	32	27	23	42	32	22	34
Endogenous1	hsa-miR-133a-5p	MIMAT0026478	32	34	44	36	34	30	41	42	37	36
Endogenous1	hsa-miR-133b	MIMAT0000770	16	21	22	15	22	13	21	22	13	22
Endogenous1	hsa-miR-134-3p	MIMAT0026481	17	21	23	22	27	17	20	40	15	13
Endogenous1	hsa-miR-134-5p+hsa-miR-6728-5p	MIMAT0000447	13	18	18	14	16	17	11	17	8	20
Endogenous1	hsa-miR-135a-5p	MIMAT0000428	9	16	17	10	21	23	14	19	13	8
Endogenous1	hsa-miR-135b-5p	MIMAT0000758	29	36	28	31	41	36	36	50	20	37
Endogenous1	hsa-miR-136-5p	MIMAT0000448	22	28	43	40	42	29	40	38	16	34
Endogenous1	hsa-miR-137	MIMAT0000429	22	28	30	35	31	23	30	37	22	27
Endogenous1	hsa-miR-138-5p	MIMAT0000430	28	34	34	29	39	35	38	40	23	26
Endogenous1	hsa-miR-139-3p	MIMAT0004552	25	44	43	37	46	43	51	42	24	19
Endogenous1	hsa-miR-139-5p	MIMAT0000250	17	15	20	18	27	20	11	16	11	16
Endogenous1	hsa-miR-140-3p	MIMAT0004597	16	28	38	28	26	21	36	28	23	26
Endogenous1	hsa-miR-140-5p	MIMAT0000431	21	28	36	27	27	35	31	34	20	23
Endogenous1	hsa-miR-141-3p	MIMAT0000432	25	27	38	37	43	59	39	52	27	42
Endogenous1	hsa-miR-142-3p	MIMAT0000434	22	33	26	67	32	27	35	39	15	34
Endogenous1	hsa-miR-142-5p	MIMAT0000433	10	20	14	16	17	14	19	15	7	13
Endogenous1	hsa-miR-143-3p	MIMAT0000435	1	1	1	1	1	1	1	1	1	1
Endogenous1	hsa-miR-144-3p	MIMAT0000436	41	47	26	40	30	35	38	49	41	31
Endogenous1	hsa-miR-145-5p	MIMAT0000437	22	24	12	25	29	19	21	26	23	17
Endogenous1	hsa-miR-1469	MIMAT0007347	11	23	25	12	17	17	24	15	14	14
Endogenous1	hsa-miR-146a-5p	MIMAT0000449	28	36	38	106	25	25	30	49	25	21
Endogenous1	hsa-miR-146b-3p	MIMAT0004766	8	13	19	17	10	11	18	12	12	9
Endogenous1	hsa-miR-146b-5p	MIMAT0002809	26	44	37	31	45	27	31	26	19	45
Endogenous1	hsa-miR-147a	MIMAT0000251	30	36	39	35	39	30	50	25	34	32
Endogenous1	hsa-miR-147b	MIMAT0004928	14	19	21	20	22	15	22	23	14	22
Endogenous1	hsa-miR-148a-3p	MIMAT0000243	44	55	37	45	34	26	36	43	19	31
Endogenous1	hsa-miR-148b-3p	MIMAT0000759	41	47	20	50	35	47	37	30	34	35
Endogenous1	hsa-miR-149-5p	MIMAT0000450	25	28	42	32	42	34	37	39	31	33
Endogenous1	hsa-miR-150-5p	MIMAT0000451	101	174	44	165	82	62	48	57	53	55
Endogenous1	hsa-miR-151a-3p	MIMAT0000757	34	32	36	61	23	22	48	37	28	28
Endogenous1	hsa-miR-151a-5p	MIMAT0004697	12	13	33	19	19	14	19	25	10	14
Endogenous1	hsa-miR-151b	MIMAT0010214	7	15	20	14	18	12	18	18	9	13
Endogenous1	hsa-miR-152-3p	MIMAT0000438	12	11	24	24	22	26	12	24	12	15
Endogenous1	hsa-miR-152-5p	MIMAT0026479	6	15	9	9	11	4	12	18	7	8
Endogenous1	hsa-miR-153-3p	MIMAT0000439	23	26	30	24	29	22	28	32	19	24
Endogenous1	hsa-miR-1537-3p	MIMAT0007399	17	28	20	26	30	39	27	18	20	15
Endogenous1	hsa-miR-154-5p	MIMAT0000452	26	22	32	27	27	26	24	27	15	30
Endogenous1	hsa-miR-155-5p	MIMAT0000646	43	59	82	44	51	35	49	56	41	41
Endogenous1	hsa-miR-15a-5p	MIMAT0000068	11	22	22	24	20	24	20	29	12	18
Endogenous1	hsa-miR-15b-5p	MIMAT0000417	22	20	16	64	29	17	24	24	16	16
Endogenous1	hsa-miR-16-5p	MIMAT0000069	75	152	30	149	35	33	43	40	23	37
Endogenous1	hsa-miR-181a-2-3p	MIMAT0004558	18	21	28	22	26	21	31	29	19	23
Endogenous1	hsa-miR-181a-3p	MIMAT0000270	24	21	29	31	44	36	32	33	26	24
Endogenous1	hsa-miR-181a-5p	MIMAT0000256	9	25	21	33	22	19	19	25	9	12
Endogenous1	hsa-miR-181b-2-3p	MIMAT0031893	16	22	36	40	42	35	48	31	17	31
Endogenous1	hsa-miR-181b-5p+hsa-miR-181d-5p	MIMAT0000257	17	23	27	14	38	16	24	35	17	16
Endogenous1	hsa-miR-181c-5p	MIMAT0000258	16	27	15	13	19	18	24	23	19	23
Endogenous1	hsa-miR-181d-3p	MIMAT0026608	17	21	19	24	29	25	21	19	18	19
Endogenous1	hsa-miR-182-3p	MIMAT0000260	19	19	21	14	19	16	16	23	14	25
Endogenous1	hsa-miR-182-5p	MIMAT0000259	14	13	11	10	17	15	11	16	9	14
Endogenous1	hsa-miR-1827	MIMAT0006767	47	81	82	78	86	82	91	87	53	57
Endogenous1	hsa-miR-183-5p	MIMAT0000261	34	45	52	49	53	49	44	49	37	36
Endogenous1	hsa-miR-184	MIMAT0000454	15	22	18	17	23	20	26	21	18	20
Endogenous1	hsa-miR-185-5p	MIMAT0000455	20	32	26	56	27	23	27	15	12	29
Endogenous1	hsa-miR-186-5p	MIMAT0000456	50	49	43	38	51	36	46	69	71	40
Endogenous1	hsa-miR-187-3p	MIMAT0000262	13	16	21	16	24	24	24	22	18	16
Endogenous1	hsa-miR-188-3p	MIMAT0004613	12	13	21	18	28	20	20	25	9	8
Endogenous1	hsa-miR-188-5p	MIMAT0000457	24	36	39	29	37	38	52	41	23	23
Endogenous1	hsa-miR-18a-5p	MIMAT0000072	11	24	23	31	27	25	29	34	6	16
Endogenous1	hsa-miR-18b-5p	MIMAT0001412	9	17	14	23	23	17	16	19	9	14
Endogenous1	hsa-miR-1908-3p	MIMAT0026916	17	23	24	18	28	21	22	25	7	16
Endogenous1	hsa-miR-1908-5p	MIMAT0007881	17	18	20	23	21	20	14	24	13	8
Endogenous1	hsa-miR-1909-3p	MIMAT0007883	21	19	17	18	17	16	16	31	9	13
Endogenous1	hsa-miR-190a-3p	MIMAT0026482	19	23	28	22	40	37	23	29	25	25
Endogenous1	hsa-miR-190a-5p	MIMAT0000458	13	19	20	18	21	27	23	25	11	23
Endogenous1	hsa-miR-190b	MIMAT0004929	31	41	62	39	53	50	59	56	42	35
Endogenous1	hsa-miR-191-5p	MIMAT0000440	18	45	43	151	46	31	44	34	11	26
Endogenous1	hsa-miR-1910-3p	MIMAT0026917	29	14	26	11	28	25	28	21	20	19
Endogenous1	hsa-miR-1910-5p	MIMAT0007884	16	18	17	15	13	23	16	22	22	15
Endogenous1	hsa-miR-1915-3p	MIMAT0007892	26	22	18	21	22	12	9	20	9	15
Endogenous1	hsa-miR-192-5p	MIMAT0000222	29	35	33	32	33	26	45	42	30	39
Endogenous1	hsa-miR-193a-3p	MIMAT0000459	16	20	16	13	21	19	25	21	10	9
Endogenous1	hsa-miR-193a-5p+hsa-miR-193b-5p	MIMAT0004614	18	20	19	16	26	20	18	22	15	12
Endogenous1	hsa-miR-193b-3p	MIMAT0002819	14	21	28	18	33	32	15	26	17	25
Endogenous1	hsa-miR-194-5p	MIMAT0000460	14	21	18	19	23	25	13	25	10	15
Endogenous1	hsa-miR-195-5p	MIMAT0000461	26	24	32	28	39	42	32	38	16	28
Endogenous1	hsa-miR-196a-3p	MIMAT0004562	19	24	32	27	27	41	32	41	18	20
Endogenous1	hsa-miR-196a-5p	MIMAT0000226	41	50	58	59	63	44	56	52	42	53
Endogenous1	hsa-miR-196b-5p	MIMAT0001080	17	23	20	18	21	24	19	24	14	16
Endogenous1	hsa-miR-197-3p	MIMAT0000227	27	33	25	84	36	25	30	31	25	17
Endogenous1	hsa-miR-197-5p	MIMAT0022691	22	40	40	22	42	36	36	39	29	29
Endogenous1	hsa-miR-1972	MIMAT0009447	32	46	48	41	52	39	47	62	34	50
Endogenous1	hsa-miR-1973	MIMAT0009448	20	22	38	29	32	35	26	30	22	23
Endogenous1	hsa-miR-1976	MIMAT0009451	23	13	26	19	16	11	19	24	12	16
Endogenous1	hsa-miR-198	MIMAT0000228	19	24	39	20	42	16	36	39	33	23
Endogenous1	hsa-miR-199a-3p+hsa-miR-199b-3p	MIMAT0000232	86	69	46	146	78	93	71	69	59	51
Endogenous1	hsa-miR-199a-5p	MIMAT0000231	30	44	45	82	44	36	35	32	21	33
Endogenous1	hsa-miR-199b-5p	MIMAT0000263	23	30	32	20	21	23	39	33	21	20
Endogenous1	hsa-miR-19a-3p	MIMAT0000073	31	39	30	46	24	16	39	25	19	23
Endogenous1	hsa-miR-19b-3p	MIMAT0000074	17	24	28	54	23	17	22	19	21	17
Endogenous1	hsa-miR-200a-3p	MIMAT0000682	35	56	72	61	61	48	76	68	36	47
Endogenous1	hsa-miR-200b-3p	MIMAT0000318	27	23	25	22	25	30	30	36	22	20
Endogenous1	hsa-miR-200c-3p	MIMAT0000617	18	28	29	27	29	37	20	33	21	23
Endogenous1	hsa-miR-202-3p	MIMAT0002811	10	23	27	18	26	22	23	28	22	12
Endogenous1	hsa-miR-203a-3p	MIMAT0000264	39	26	25	35	36	35	26	42	40	44
Endogenous1	hsa-miR-203a-5p	MIMAT0031890	23	37	28	25	38	38	34	41	37	33
Endogenous1	hsa-miR-204-5p	MIMAT0000265	10	8	9	9	13	8	12	17	6	9
Endogenous1	hsa-miR-205-5p	MIMAT0000266	20	35	24	20	29	25	25	36	19	24
Endogenous1	hsa-miR-2053	MIMAT0009978	40	34	46	31	60	50	35	49	40	42
Endogenous1	hsa-miR-206	MIMAT0000462	22	27	30	20	25	20	34	33	29	23
Endogenous1	hsa-miR-208a-3p	MIMAT0000241	13	24	25	12	28	14	14	19	11	11
Endogenous1	hsa-miR-208b-3p	MIMAT0004960	27	31	26	36	30	26	40	38	35	30
Endogenous1	hsa-miR-208b-5p	MIMAT0026722	13	13	18	21	27	23	18	44	19	13
Endogenous1	hsa-miR-20a-5p+hsa-miR-20b-5p	MIMAT0000075	34	47	37	109	52	37	51	40	17	27
Endogenous1	hsa-miR-21-5p	MIMAT0000076	44	52	26	76	26	30	33	40	25	20
Endogenous1	hsa-miR-210-3p	MIMAT0000267	19	16	20	23	15	16	32	19	15	8
Endogenous1	hsa-miR-210-5p	MIMAT0026475	7	13	11	18	19	20	15	18	11	11
Endogenous1	hsa-miR-211-3p	MIMAT0022694	23	25	26	24	29	23	36	36	27	24
Endogenous1	hsa-miR-211-5p	MIMAT0000268	12	12	23	17	27	26	22	46	15	20
Endogenous1	hsa-miR-2110	MIMAT0010133	22	25	52	41	42	37	37	42	39	31
Endogenous1	hsa-miR-2113	MIMAT0009206	21	19	27	23	32	29	22	36	18	29
Endogenous1	hsa-miR-2116-5p	MIMAT0011160	102	158	135	88	78	72	106	120	159	92
Endogenous1	hsa-miR-2117	MIMAT0011162	48	63	51	58	46	43	39	47	51	42
Endogenous1	hsa-miR-212-3p	MIMAT0000269	43	63	65	73	94	66	76	76	48	57
Endogenous1	hsa-miR-214-3p	MIMAT0000271	19	19	32	22	22	20	26	24	17	17
Endogenous1	hsa-miR-215-5p	MIMAT0000272	27	38	29	37	43	27	38	41	34	27
Endogenous1	hsa-miR-216a-5p	MIMAT0000273	33	45	44	35	39	61	57	55	28	30
Endogenous1	hsa-miR-216b-5p	MIMAT0004959	31	46	25	31	45	22	40	44	28	26
Endogenous1	hsa-miR-217	MIMAT0000274	20	30	29	21	26	23	27	33	13	19
Endogenous1	hsa-miR-218-5p	MIMAT0000275	44	36	40	38	34	34	48	42	44	41
Endogenous1	hsa-miR-219a-1-3p	MIMAT0004567	15	30	31	27	19	15	25	25	13	20
Endogenous1	hsa-miR-219a-2-3p	MIMAT0004675	58	52	60	56	52	43	58	44	49	43
Endogenous1	hsa-miR-219a-5p	MIMAT0000276	48	56	39	49	52	46	46	48	33	50
Endogenous1	hsa-miR-219b-3p	MIMAT0019748	45	47	39	39	45	53	45	44	39	46
Endogenous1	hsa-miR-22-3p	MIMAT0000077	23	43	12	39	12	13	23	13	16	15
Endogenous1	hsa-miR-221-3p	MIMAT0000278	24	41	25	56	35	31	28	27	26	36
Endogenous1	hsa-miR-221-5p	MIMAT0004568	18	17	24	15	24	23	20	27	13	18
Endogenous1	hsa-miR-222-3p	MIMAT0000279	28	34	26	44	41	28	31	44	21	21
Endogenous1	hsa-miR-223-3p	MIMAT0000280	40	165	52	877	66	35	40	44	25	31
Endogenous1	hsa-miR-224-5p	MIMAT0000281	35	51	42	30	35	31	31	49	21	44
Endogenous1	hsa-miR-2278	MIMAT0011778	10	25	12	12	22	16	23	19	15	12
Endogenous1	hsa-miR-23a-3p	MIMAT0000078	47	79	38	293	52	44	35	46	26	26
Endogenous1	hsa-miR-23b-3p	MIMAT0000418	15	17	20	21	17	24	16	21	17	16
Endogenous1	hsa-miR-23c	MIMAT0018000	30	35	32	37	49	33	34	43	31	31
Endogenous1	hsa-miR-24-3p	MIMAT0000080	25	36	37	61	28	38	35	40	23	34
Endogenous1	hsa-miR-25-3p	MIMAT0000081	50	102	17	122	32	34	31	28	21	32
Endogenous1	hsa-miR-25-5p	MIMAT0004498	21	25	27	12	26	14	23	18	16	17
Endogenous1	hsa-miR-2682-5p	MIMAT0013517	27	43	32	29	33	45	37	40	24	30
Endogenous1	hsa-miR-26a-5p	MIMAT0000082	42	46	52	65	61	25	33	57	37	43
Endogenous1	hsa-miR-26b-5p	MIMAT0000083	25	32	43	30	32	30	46	40	21	33
Endogenous1	hsa-miR-27a-3p	MIMAT0000084	19	31	31	21	33	31	32	47	28	34
Endogenous1	hsa-miR-27b-3p	MIMAT0000419	21	31	26	25	19	28	21	30	9	16
Endogenous1	hsa-miR-28-3p	MIMAT0004502	19	27	32	23	44	16	26	29	27	28
Endogenous1	hsa-miR-28-5p	MIMAT0000085	37	47	43	47	52	52	54	55	31	35
Endogenous1	hsa-miR-296-3p	MIMAT0004679	11	14	22	24	26	26	15	28	13	12
Endogenous1	hsa-miR-296-5p	MIMAT0000690	17	24	24	19	20	19	20	34	18	18
Endogenous1	hsa-miR-297	MIMAT0004450	10	17	17	8	19	24	11	22	20	20
Endogenous1	hsa-miR-298	MIMAT0004901	17	31	32	32	37	32	39	28	29	29
Endogenous1	hsa-miR-299-3p	MIMAT0000687	23	23	23	20	26	17	29	26	18	16
Endogenous1	hsa-miR-299-5p	MIMAT0002890	34	28	44	27	32	32	24	38	28	33
Endogenous1	hsa-miR-29a-3p	MIMAT0000086	32	40	59	46	50	42	48	64	38	41
Endogenous1	hsa-miR-29b-3p	MIMAT0000100	19	16	25	20	32	15	23	30	14	26
Endogenous1	hsa-miR-29c-3p	MIMAT0000681	8	24	32	20	27	18	22	23	12	16
Endogenous1	hsa-miR-300	MIMAT0004903	23	13	24	16	20	18	25	30	22	16
Endogenous1	hsa-miR-301a-3p	MIMAT0000688	17	15	19	22	20	28	24	28	17	15
Endogenous1	hsa-miR-301a-5p	MIMAT0022696	27	42	56	53	70	52	54	75	35	46
Endogenous1	hsa-miR-301b-3p	MIMAT0004958	35	35	58	47	60	64	49	71	45	49
Endogenous1	hsa-miR-301b-5p	MIMAT0032026	12	28	31	21	23	20	30	24	18	15
Endogenous1	hsa-miR-302a-3p	MIMAT0000684	24	26	27	22	32	32	35	33	29	25
Endogenous1	hsa-miR-302a-5p	MIMAT0000683	30	44	37	35	27	25	31	44	27	23
Endogenous1	hsa-miR-302b-3p	MIMAT0000715	21	33	43	38	39	33	39	36	34	23
Endogenous1	hsa-miR-302c-3p	MIMAT0000717	22	25	31	32	29	28	41	35	25	31
Endogenous1	hsa-miR-302d-3p	MIMAT0000718	325	351	360	228	258	350	260	245	294	246
Endogenous1	hsa-miR-302e	MIMAT0005931	23	34	29	38	38	32	33	41	24	25
Endogenous1	hsa-miR-302f	MIMAT0005932	28	26	26	28	31	33	38	35	20	27
Endogenous1	hsa-miR-3065-3p	MIMAT0015378	13	21	34	11	26	26	26	30	16	13
Endogenous1	hsa-miR-3065-5p	MIMAT0015066	1	1	1	1	1	1	1	1	1	1
Endogenous1	hsa-miR-3074-3p	MIMAT0015027	33	42	40	28	38	46	42	50	36	27
Endogenous1	hsa-miR-30a-3p	MIMAT0000088	17	37	15	23	29	29	26	36	18	29
Endogenous1	hsa-miR-30a-5p	MIMAT0000087	42	55	34	39	27	30	18	36	24	27
Endogenous1	hsa-miR-30b-5p	MIMAT0000420	19	33	31	26	31	25	28	40	23	28
Endogenous1	hsa-miR-30c-5p	MIMAT0000244	27	32	22	38	36	26	35	37	27	27
Endogenous1	hsa-miR-30d-5p	MIMAT0000245	16	32	12	35	11	12	8	13	7	9
Endogenous1	hsa-miR-30e-3p	MIMAT0000693	18	24	23	28	40	21	35	32	19	18
Endogenous1	hsa-miR-30e-5p	MIMAT0000692	133	151	121	134	114	69	146	121	137	98
Endogenous1	hsa-miR-31-5p	MIMAT0000089	19	21	26	29	25	22	31	21	17	16
Endogenous1	hsa-miR-3127-5p	MIMAT0014990	20	18	29	32	34	32	19	42	25	24
Endogenous1	hsa-miR-3130-3p	MIMAT0014994	27	27	30	30	32	22	38	44	32	22
Endogenous1	hsa-miR-3131	MIMAT0014996	20	41	35	38	40	34	29	38	37	23
Endogenous1	hsa-miR-3136-5p	MIMAT0015003	54	74	56	38	36	35	48	57	61	50
Endogenous1	hsa-miR-3140-3p	MIMAT0015008	11	18	13	10	13	13	21	24	8	9
Endogenous1	hsa-miR-3140-5p	MIMAT0019204	16	14	24	17	27	18	16	27	19	20
Endogenous1	hsa-miR-3144-3p	MIMAT0015015	88	103	99	111	146	107	101	125	123	140
Endogenous1	hsa-miR-3144-5p	MIMAT0015014	16	27	36	22	24	15	29	27	21	23
Endogenous1	hsa-miR-3147	MIMAT0015019	20	27	30	26	37	30	33	41	25	21
Endogenous1	hsa-miR-3150b-3p	MIMAT0018194	12	21	15	16	29	24	21	28	21	17
Endogenous1	hsa-miR-3151-5p	MIMAT0015024	20	17	15	22	19	15	17	22	19	18
Endogenous1	hsa-miR-3158-3p	MIMAT0015032	16	28	15	19	25	24	24	17	15	18
Endogenous1	hsa-miR-3161	MIMAT0015035	108	163	140	101	88	72	104	128	108	116
Endogenous1	hsa-miR-3164	MIMAT0015038	26	30	27	28	28	27	26	34	22	31
Endogenous1	hsa-miR-3168	MIMAT0015043	23	32	30	17	33	26	32	25	17	14
Endogenous1	hsa-miR-3179	MIMAT0015056	19	29	21	24	19	18	34	33	16	15
Endogenous1	hsa-miR-3180	MIMAT0018178	36	37	43	39	41	25	41	44	27	26
Endogenous1	hsa-miR-3180-3p	MIMAT0015058	20	28	38	28	42	31	33	38	21	29
Endogenous1	hsa-miR-3180-5p	MIMAT0015057	8	27	23	17	20	24	27	25	22	22
Endogenous1	hsa-miR-3182	MIMAT0015062	16	28	32	26	28	18	31	29	17	23
Endogenous1	hsa-miR-3185	MIMAT0015065	18	23	36	22	24	19	29	30	15	27
Endogenous1	hsa-miR-3190-3p	MIMAT0022839	7	7	19	16	15	15	16	15	10	14
Endogenous1	hsa-miR-3192-5p	MIMAT0015076	32	31	52	26	49	29	30	38	24	32
Endogenous1	hsa-miR-3195	MIMAT0015079	25	28	26	21	34	26	32	39	17	22
Endogenous1	hsa-miR-3196	MIMAT0015080	21	31	31	27	34	24	21	24	21	19
Endogenous1	hsa-miR-32-5p	MIMAT0000090	62	50	67	40	42	32	51	61	49	39
Endogenous1	hsa-miR-3202	MIMAT0015089	46	56	45	52	60	87	35	45	43	42
Endogenous1	hsa-miR-320a	MIMAT0000510	16	24	25	23	23	21	21	27	23	19
Endogenous1	hsa-miR-320b	MIMAT0005792	21	20	32	32	27	21	28	22	24	19
Endogenous1	hsa-miR-320c	MIMAT0005793	9	17	17	18	12	19	18	17	5	17
Endogenous1	hsa-miR-320d	MIMAT0006764	68	102	98	64	51	57	59	72	54	68
Endogenous1	hsa-miR-320e	MIMAT0015072	185	237	57	91	51	37	41	62	42	38
Endogenous1	hsa-miR-323a-3p	MIMAT0000755	14	13	26	18	22	16	11	24	12	20
Endogenous1	hsa-miR-323a-5p	MIMAT0004696	4	8	15	19	21	12	21	11	11	15
Endogenous1	hsa-miR-323b-3p	MIMAT0015050	19	20	37	15	32	23	33	43	16	23
Endogenous1	hsa-miR-323b-5p	MIMAT0001630	30	25	32	26	25	32	33	26	31	20
Endogenous1	hsa-miR-324-3p	MIMAT0000762	25	45	53	49	51	40	46	47	19	43
Endogenous1	hsa-miR-324-5p	MIMAT0000761	20	11	17	18	24	18	15	14	10	12
Endogenous1	hsa-miR-325	MIMAT0000771	40	49	64	51	65	65	53	70	42	41
Endogenous1	hsa-miR-326	MIMAT0000756	17	16	15	24	24	14	24	25	7	15
Endogenous1	hsa-miR-328-3p	MIMAT0000752	10	28	26	27	33	12	24	26	10	11
Endogenous1	hsa-miR-328-5p	MIMAT0026486	15	20	19	25	23	24	23	33	16	18
Endogenous1	hsa-miR-329-3p	MIMAT0001629	19	28	28	22	31	27	24	41	20	23
Endogenous1	hsa-miR-329-5p	MIMAT0026555	15	20	37	27	31	30	31	26	19	23
Endogenous1	hsa-miR-330-3p	MIMAT0000751	8	12	18	14	20	17	10	17	13	12
Endogenous1	hsa-miR-330-5p	MIMAT0004693	13	22	27	16	17	28	28	23	15	22
Endogenous1	hsa-miR-331-3p	MIMAT0000760	21	35	32	34	30	25	41	38	21	22
Endogenous1	hsa-miR-331-5p	MIMAT0004700	8	18	16	22	16	22	15	12	10	15
Endogenous1	hsa-miR-335-5p	MIMAT0000765	23	24	29	29	24	24	33	36	21	23
Endogenous1	hsa-miR-337-3p	MIMAT0000754	23	31	34	24	34	24	32	32	24	28
Endogenous1	hsa-miR-337-5p	MIMAT0004695	18	19	29	28	33	30	37	35	13	24
Endogenous1	hsa-miR-338-5p	MIMAT0004701	10	17	19	17	29	20	19	30	15	20
Endogenous1	hsa-miR-339-3p	MIMAT0004702	22	26	21	19	28	30	28	28	13	19
Endogenous1	hsa-miR-339-5p	MIMAT0000764	13	24	23	26	33	31	27	31	23	17
Endogenous1	hsa-miR-33a-5p	MIMAT0000091	40	37	37	28	38	55	27	43	39	42
Endogenous1	hsa-miR-33b-5p	MIMAT0003301	10	12	22	25	29	35	31	39	26	23
Endogenous1	hsa-miR-340-5p	MIMAT0004692	34	36	49	61	65	56	48	54	44	41
Endogenous1	hsa-miR-342-3p	MIMAT0000753	40	55	27	57	48	39	41	36	29	21
Endogenous1	hsa-miR-342-5p	MIMAT0004694	13	27	24	18	25	25	26	26	17	14
Endogenous1	hsa-miR-345-3p	MIMAT0022698	26	28	29	35	53	25	41	43	18	27
Endogenous1	hsa-miR-345-5p	MIMAT0000772	21	19	40	12	26	21	20	21	19	17
Endogenous1	hsa-miR-346	MIMAT0000773	15	26	27	21	27	21	33	25	15	20
Endogenous1	hsa-miR-34a-5p	MIMAT0000255	32	38	33	25	22	36	24	33	20	30
Endogenous1	hsa-miR-34b-3p	MIMAT0004676	14	15	22	15	20	21	30	26	13	14
Endogenous1	hsa-miR-34c-3p	MIMAT0004677	21	14	30	21	29	24	23	21	17	25
Endogenous1	hsa-miR-34c-5p	MIMAT0000686	18	17	26	23	20	25	15	28	15	28
Endogenous1	hsa-miR-3605-3p	MIMAT0017982	15	9	15	12	16	13	18	14	11	13
Endogenous1	hsa-miR-3605-5p	MIMAT0017981	16	36	31	35	35	33	34	51	14	30
Endogenous1	hsa-miR-361-3p	MIMAT0004682	17	21	24	29	26	24	25	27	18	14
Endogenous1	hsa-miR-361-5p	MIMAT0000703	17	26	20	32	23	20	27	25	18	16
Endogenous1	hsa-miR-3613-3p	MIMAT0017991	16	28	28	36	26	30	21	39	17	24
Endogenous1	hsa-miR-3613-5p	MIMAT0017990	15	33	29	21	38	22	37	41	24	22
Endogenous1	hsa-miR-3614-3p	MIMAT0017993	27	36	41	30	41	28	37	47	29	28
Endogenous1	hsa-miR-3614-5p	MIMAT0017992	13	9	28	22	22	12	23	20	13	18
Endogenous1	hsa-miR-3615	MIMAT0017994	18	29	26	24	27	26	25	37	20	21
Endogenous1	hsa-miR-362-3p	MIMAT0004683	19	20	21	19	26	19	23	17	20	15
Endogenous1	hsa-miR-362-5p	MIMAT0000705	13	17	23	23	20	24	24	27	19	27
Endogenous1	hsa-miR-363-3p	MIMAT0000707	73	89	92	81	134	120	127	116	80	102
Endogenous1	hsa-miR-363-5p	MIMAT0003385	39	47	46	28	38	41	38	41	59	21
Endogenous1	hsa-miR-365a-3p+hsa-miR-365b-3p	MIMAT0000710	23	54	31	40	41	27	33	46	26	32
Endogenous1	hsa-miR-365b-5p	MIMAT0022833	22	27	25	20	25	26	26	33	12	20
Endogenous1	hsa-miR-367-3p	MIMAT0000719	28	26	25	22	39	14	24	30	20	17
Endogenous1	hsa-miR-369-3p	MIMAT0000721	16	31	31	23	34	33	31	31	20	20
Endogenous1	hsa-miR-369-5p	MIMAT0001621	19	19	26	16	32	21	22	26	15	14
Endogenous1	hsa-miR-3690	MIMAT0018119	10	27	33	34	27	29	25	23	20	24
Endogenous1	hsa-miR-370-3p	MIMAT0000722	17	23	18	24	36	28	28	42	26	18
Endogenous1	hsa-miR-370-5p	MIMAT0026483	5	25	19	19	21	17	27	34	25	15
Endogenous1	hsa-miR-371a-5p	MIMAT0004687	36	24	33	21	36	36	29	45	24	34
Endogenous1	hsa-miR-371b-5p	MIMAT0019892	25	30	25	24	19	30	31	49	14	22
Endogenous1	hsa-miR-372-3p	MIMAT0000724	19	26	29	19	44	35	32	28	24	17
Endogenous1	hsa-miR-373-3p	MIMAT0000726	16	19	21	22	30	27	25	24	17	13
Endogenous1	hsa-miR-374a-3p	MIMAT0004688	15	28	27	33	31	32	34	38	21	22
Endogenous1	hsa-miR-374a-5p	MIMAT0000727	23	33	28	27	30	16	31	39	28	26
Endogenous1	hsa-miR-374b-5p	MIMAT0004955	17	47	38	30	32	26	27	35	18	27
Endogenous1	hsa-miR-374c-5p	MIMAT0018443	23	25	20	26	36	31	28	34	15	20
Endogenous1	hsa-miR-375	MIMAT0000728	10	25	21	27	24	27	27	31	14	16
Endogenous1	hsa-miR-376a-2-5p	MIMAT0022928	23	23	37	25	32	23	27	35	19	33
Endogenous1	hsa-miR-376a-3p	MIMAT0000729	31	43	37	64	54	38	25	45	20	29
Endogenous1	hsa-miR-376b-3p	MIMAT0002172	21	22	27	24	31	23	38	38	25	29
Endogenous1	hsa-miR-376c-3p	MIMAT0000720	21	20	30	21	27	24	19	28	20	21
Endogenous1	hsa-miR-376c-5p	MIMAT0022861	13	19	22	22	22	29	21	30	11	13
Endogenous1	hsa-miR-377-3p	MIMAT0000730	21	29	39	25	35	26	33	32	22	24
Endogenous1	hsa-miR-378b	MIMAT0014999	22	24	17	20	19	24	24	24	21	14
Endogenous1	hsa-miR-378c	MIMAT0016847	13	16	17	18	27	15	17	19	10	12
Endogenous1	hsa-miR-378d	MIMAT0018926	10	23	26	18	26	22	28	32	20	15
Endogenous1	hsa-miR-378e	MIMAT0018927	1	1	1	1	1	1	1	1	1	1
Endogenous1	hsa-miR-378f	MIMAT0018932	36	62	53	53	56	54	67	55	45	55
Endogenous1	hsa-miR-378g	MIMAT0018937	28	41	38	28	40	31	44	37	28	35
Endogenous1	hsa-miR-378h	MIMAT0018984	118	131	124	118	95	100	113	139	98	101
Endogenous1	hsa-miR-378i	MIMAT0019074	38	36	43	49	51	37	35	37	24	31
Endogenous1	hsa-miR-379-5p	MIMAT0000733	75	92	71	87	89	67	77	82	57	66
Endogenous1	hsa-miR-380-3p	MIMAT0000735	19	41	38	32	34	41	40	47	40	32
Endogenous1	hsa-miR-381-3p	MIMAT0000736	17	14	29	29	29	20	29	28	14	22
Endogenous1	hsa-miR-381-5p	MIMAT0022862	65	46	44	31	51	82	44	63	53	51
Endogenous1	hsa-miR-382-3p	MIMAT0022697	10	18	20	16	23	17	22	33	15	30
Endogenous1	hsa-miR-382-5p	MIMAT0000737	18	24	26	40	27	26	27	37	13	17
Endogenous1	hsa-miR-383-5p	MIMAT0000738	11	23	30	25	23	13	31	19	18	18
Endogenous1	hsa-miR-384	MIMAT0001075	25	42	30	31	52	34	32	44	23	36
Endogenous1	hsa-miR-3916	MIMAT0018190	15	18	19	12	14	26	20	27	8	16
Endogenous1	hsa-miR-3918	MIMAT0018192	17	16	23	17	26	15	19	23	20	21
Endogenous1	hsa-miR-3928-3p	MIMAT0018205	22	28	45	41	40	34	37	49	21	34
Endogenous1	hsa-miR-3934-5p	MIMAT0018349	19	25	38	27	24	36	29	40	19	20
Endogenous1	hsa-miR-409-3p	MIMAT0001639	10	25	31	46	14	27	27	24	17	23
Endogenous1	hsa-miR-409-5p	MIMAT0001638	18	23	17	15	16	16	15	16	16	18
Endogenous1	hsa-miR-410-3p	MIMAT0002171	23	33	52	36	39	37	38	43	36	36
Endogenous1	hsa-miR-411-5p	MIMAT0003329	74	69	77	77	46	42	52	59	45	52
Endogenous1	hsa-miR-412-3p	MIMAT0002170	24	20	36	34	33	25	32	35	19	21
Endogenous1	hsa-miR-421	MIMAT0003339	35	33	50	43	46	41	36	47	26	38
Endogenous1	hsa-miR-422a	MIMAT0001339	12	1	1	1	1	1	1	1	1	1
Endogenous1	hsa-miR-423-3p	MIMAT0001340	28	39	44	53	43	30	35	47	42	31
Endogenous1	hsa-miR-423-5p	MIMAT0004748	54	89	34	194	41	36	30	43	25	27
Endogenous1	hsa-miR-424-5p	MIMAT0001341	23	18	25	21	37	24	29	32	17	29
Endogenous1	hsa-miR-425-5p	MIMAT0003393	16	33	23	53	23	21	16	27	8	22
Endogenous1	hsa-miR-4284	MIMAT0016915	18	16	29	19	20	21	29	22	20	22
Endogenous1	hsa-miR-4286	MIMAT0016916	28	22	33	27	36	28	27	45	22	26
Endogenous1	hsa-miR-429	MIMAT0001536	40	27	27	21	32	29	34	34	21	25
Endogenous1	hsa-miR-431-5p	MIMAT0001625	9	16	6	11	17	11	10	15	10	9
Endogenous1	hsa-miR-432-5p	MIMAT0002814	21	26	35	29	26	28	29	21	30	24
Endogenous1	hsa-miR-433-3p	MIMAT0001627	24	21	25	20	17	27	19	20	27	22
Endogenous1	hsa-miR-433-5p	MIMAT0026554	25	30	39	34	33	32	39	40	26	39
Endogenous1	hsa-miR-4421	MIMAT0018934	14	17	21	33	27	34	37	25	18	26
Endogenous1	hsa-miR-4425	MIMAT0018940	15	14	20	11	35	16	20	27	17	22
Endogenous1	hsa-miR-4431	MIMAT0018947	27	23	46	25	33	21	27	40	20	28
Endogenous1	hsa-miR-4435	MIMAT0018951	17	22	22	22	15	16	34	30	20	18
Endogenous1	hsa-miR-4443	MIMAT0018961	61	86	107	80	89	94	82	96	61	59
Endogenous1	hsa-miR-4448	MIMAT0018967	12	12	18	14	17	15	17	15	11	16
Endogenous1	hsa-miR-4451	MIMAT0018973	26	20	35	27	35	39	31	30	25	25
Endogenous1	hsa-miR-4454+hsa-miR-7975	MIMAT0018976	645	556	168	102	152	149	97	304	264	249
Endogenous1	hsa-miR-4455	MIMAT0018977	62	74	83	63	56	43	59	61	47	39
Endogenous1	hsa-miR-4458	MIMAT0018980	9	24	21	19	31	21	24	25	19	18
Endogenous1	hsa-miR-4461	MIMAT0018983	19	19	22	18	30	16	32	29	20	20
Endogenous1	hsa-miR-448	MIMAT0001532	39	33	39	35	43	41	38	41	38	28
Endogenous1	hsa-miR-4485-3p	MIMAT0019019	18	16	27	15	22	21	24	31	13	17
Endogenous1	hsa-miR-4488	MIMAT0019022	23	27	30	25	30	21	38	34	21	17
Endogenous1	hsa-miR-449a	MIMAT0001541	15	19	21	22	24	21	16	32	15	18
Endogenous1	hsa-miR-449b-5p	MIMAT0003327	23	32	49	39	35	31	40	59	28	39
Endogenous1	hsa-miR-449c-5p	MIMAT0010251	11	22	27	19	27	21	24	28	14	19
Endogenous1	hsa-miR-450a-1-3p	MIMAT0022700	20	24	27	26	25	43	38	26	24	26
Endogenous1	hsa-miR-450a-2-3p	MIMAT0031074	15	25	30	13	31	21	27	31	24	12
Endogenous1	hsa-miR-450a-5p	MIMAT0001545	25	29	39	30	35	44	48	40	26	39
Endogenous1	hsa-miR-450b-3p	MIMAT0004910	22	25	36	33	37	34	38	50	27	33
Endogenous1	hsa-miR-450b-5p	MIMAT0004909	41	39	36	44	46	35	36	52	37	37
Endogenous1	hsa-miR-4516	MIMAT0019053	42	45	20	30	34	25	31	29	24	17
Endogenous1	hsa-miR-451a	MIMAT0001631	445	2821	59	2228	295	595	295	421	60	159
Endogenous1	hsa-miR-452-5p	MIMAT0001635	21	26	24	22	25	37	24	24	18	20
Endogenous1	hsa-miR-4521	MIMAT0019058	28	22	38	21	36	31	29	37	17	26
Endogenous1	hsa-miR-4524a-5p	MIMAT0019062	13	19	29	16	24	17	19	14	23	15
Endogenous1	hsa-miR-4531	MIMAT0019070	94	83	88	82	57	42	85	74	79	44
Endogenous1	hsa-miR-4532	MIMAT0019071	23	35	22	24	26	25	23	19	15	18
Endogenous1	hsa-miR-4536-3p	MIMAT0020959	37	37	34	33	33	44	30	34	32	35
Endogenous1	hsa-miR-4536-5p	MIMAT0019078	178	214	189	147	158	206	149	155	115	110
Endogenous1	hsa-miR-454-3p	MIMAT0003885	22	26	18	14	25	9	32	40	23	38
Endogenous1	hsa-miR-455-3p	MIMAT0004784	13	8	20	16	16	20	16	7	17	11
Endogenous1	hsa-miR-455-5p	MIMAT0003150	23	15	30	28	27	25	20	37	25	28
Endogenous1	hsa-miR-4647	MIMAT0019709	19	15	30	20	32	24	31	31	20	25
Endogenous1	hsa-miR-4707-3p	MIMAT0019808	15	22	21	23	19	31	27	24	18	12
Endogenous1	hsa-miR-4707-5p	MIMAT0019807	19	23	38	22	23	28	33	32	27	28
Endogenous1	hsa-miR-4741	MIMAT0019871	12	20	38	22	19	33	36	20	24	25
Endogenous1	hsa-miR-4755-5p	MIMAT0019895	25	54	55	40	42	43	42	52	28	36
Endogenous1	hsa-miR-4787-3p	MIMAT0019957	19	37	29	37	46	39	43	36	21	36
Endogenous1	hsa-miR-4787-5p	MIMAT0019956	14	41	33	33	42	27	37	25	18	29
Endogenous1	hsa-miR-4792	MIMAT0019964	17	29	17	24	34	19	27	27	15	24
Endogenous1	hsa-miR-483-3p	MIMAT0002173	17	21	20	20	21	25	31	27	12	22
Endogenous1	hsa-miR-483-5p	MIMAT0004761	14	22	24	24	25	21	22	24	23	23
Endogenous1	hsa-miR-484	MIMAT0002174	17	20	21	37	32	31	32	22	16	24
Endogenous1	hsa-miR-485-3p	MIMAT0002176	27	31	32	31	34	23	26	20	18	21
Endogenous1	hsa-miR-485-5p	MIMAT0002175	25	23	33	30	32	30	35	35	28	29
Endogenous1	hsa-miR-486-3p	MIMAT0004762	34	29	30	58	32	27	34	28	34	25
Endogenous1	hsa-miR-487a-3p	MIMAT0002178	16	22	22	27	28	23	26	23	16	18
Endogenous1	hsa-miR-487b-3p	MIMAT0003180	16	15	17	13	18	21	25	20	8	15
Endogenous1	hsa-miR-487b-5p	MIMAT0026614	14	15	26	13	23	15	23	18	10	13
Endogenous1	hsa-miR-488-3p	MIMAT0004763	15	21	30	24	40	37	40	36	21	18
Endogenous1	hsa-miR-489-3p	MIMAT0002805	14	13	29	24	23	19	26	36	13	8
Endogenous1	hsa-miR-490-3p	MIMAT0002806	17	18	29	24	25	24	33	38	9	16
Endogenous1	hsa-miR-490-5p	MIMAT0004764	21	13	32	28	23	30	21	23	15	14
Endogenous1	hsa-miR-491-3p	MIMAT0004765	28	34	27	34	45	39	37	53	24	24
Endogenous1	hsa-miR-491-5p	MIMAT0002807	22	27	31	25	19	16	26	26	25	30
Endogenous1	hsa-miR-492	MIMAT0002812	22	15	17	18	21	21	25	20	11	15
Endogenous1	hsa-miR-493-3p	MIMAT0003161	22	29	40	25	37	32	22	38	24	23
Endogenous1	hsa-miR-494-3p	MIMAT0002816	351	163	1	1	1	1	1	1	1	1
Endogenous1	hsa-miR-494-5p	MIMAT0026607	25	21	24	22	29	18	15	28	19	15
Endogenous1	hsa-miR-495-3p	MIMAT0002817	213	198	212	203	248	262	182	228	173	218
Endogenous1	hsa-miR-495-5p	MIMAT0022924	36	24	34	27	40	35	42	40	29	20
Endogenous1	hsa-miR-496	MIMAT0002818	24	31	29	28	28	18	23	30	23	23
Endogenous1	hsa-miR-497-5p	MIMAT0002820	27	41	35	29	50	28	31	34	28	23
Endogenous1	hsa-miR-498	MIMAT0002824	40	43	34	40	32	38	46	33	21	24
Endogenous1	hsa-miR-499a-3p	MIMAT0004772	24	36	50	39	24	32	30	38	22	19
Endogenous1	hsa-miR-499a-5p	MIMAT0002870	232	182	152	141	113	193	132	163	205	160
Endogenous1	hsa-miR-499b-3p	MIMAT0019898	24	37	32	30	46	28	33	39	20	39
Endogenous1	hsa-miR-499b-5p	MIMAT0019897	21	24	37	36	28	29	43	33	12	21
Endogenous1	hsa-miR-5001-3p	MIMAT0021022	8	18	14	15	21	21	16	21	17	18
Endogenous1	hsa-miR-5001-5p	MIMAT0021021	21	30	20	27	28	23	31	22	16	20
Endogenous1	hsa-miR-500a-5p+hsa-miR-501-5p	MIMAT0004773	13	12	23	18	22	11	24	18	11	18
Endogenous1	hsa-miR-501-3p	MIMAT0004774	12	19	18	19	14	18	20	26	17	17
Endogenous1	hsa-miR-5010-3p	MIMAT0021044	19	19	17	17	25	17	15	16	16	13
Endogenous1	hsa-miR-5010-5p	MIMAT0021043	11	12	21	23	19	17	22	20	9	20
Endogenous1	hsa-miR-502-3p	MIMAT0004775	20	32	27	19	33	22	32	30	17	26
Endogenous1	hsa-miR-502-5p	MIMAT0002873	1	1	1	1	1	1	1	1	1	1
Endogenous1	hsa-miR-503-3p	MIMAT0022925	21	12	19	18	31	25	30	22	16	33
Endogenous1	hsa-miR-503-5p	MIMAT0002874	15	27	45	27	42	27	33	34	24	44
Endogenous1	hsa-miR-504-3p	MIMAT0026612	15	18	25	16	21	15	33	29	12	20
Endogenous1	hsa-miR-504-5p	MIMAT0002875	21	26	18	17	34	27	32	42	24	28
Endogenous1	hsa-miR-505-3p	MIMAT0002876	16	19	30	30	37	26	27	31	21	27
Endogenous1	hsa-miR-506-3p	MIMAT0002878	20	33	30	24	32	31	35	28	16	24
Endogenous1	hsa-miR-506-5p	MIMAT0022701	25	31	43	24	39	33	44	39	42	40
Endogenous1	hsa-miR-507	MIMAT0002879	27	29	23	15	31	19	28	24	12	21
Endogenous1	hsa-miR-508-3p	MIMAT0002880	37	47	37	28	43	58	40	39	46	44
Endogenous1	hsa-miR-508-5p	MIMAT0004778	17	24	26	26	35	29	26	36	19	20
Endogenous1	hsa-miR-509-3-5p	MIMAT0004975	23	33	34	36	41	32	37	34	15	22
Endogenous1	hsa-miR-509-3p	MIMAT0002881	15	21	32	20	16	21	21	26	13	13
Endogenous1	hsa-miR-509-5p	MIMAT0004779	14	22	29	27	40	23	23	28	16	27
Endogenous1	hsa-miR-510-3p	MIMAT0026613	15	20	17	19	25	19	20	39	18	15
Endogenous1	hsa-miR-510-5p	MIMAT0002882	13	18	17	13	16	13	6	26	12	13
Endogenous1	hsa-miR-511-5p	MIMAT0002808	90	44	61	49	51	50	40	60	76	51
Endogenous1	hsa-miR-512-3p	MIMAT0002823	12	13	11	11	13	13	16	7	5	14
Endogenous1	hsa-miR-512-5p	MIMAT0002822	16	27	27	23	32	22	33	34	15	20
Endogenous1	hsa-miR-513a-3p	MIMAT0004777	37	30	30	29	30	27	29	27	29	21
Endogenous1	hsa-miR-513a-5p	MIMAT0002877	15	15	23	13	30	22	20	30	8	15
Endogenous1	hsa-miR-513b-5p	MIMAT0005788	18	23	25	26	39	36	35	38	36	25
Endogenous1	hsa-miR-513c-3p	MIMAT0022728	25	26	33	25	34	29	35	30	23	25
Endogenous1	hsa-miR-513c-5p	MIMAT0005789	17	31	53	44	42	38	38	60	18	31
Endogenous1	hsa-miR-514a-3p	MIMAT0002883	27	28	44	27	41	30	40	34	28	28
Endogenous1	hsa-miR-514a-5p	MIMAT0022702	17	23	17	26	24	24	27	33	20	20
Endogenous1	hsa-miR-514b-3p	MIMAT0015088	35	35	45	42	33	33	40	57	39	27
Endogenous1	hsa-miR-514b-5p	MIMAT0015087	42	56	50	54	59	45	56	46	33	44
Endogenous1	hsa-miR-515-3p	MIMAT0002827	22	29	31	36	32	18	28	35	16	22
Endogenous1	hsa-miR-515-5p	MIMAT0002826	38	36	29	35	42	32	38	50	46	42
Endogenous1	hsa-miR-516a-3p+hsa-miR-516b-3p	MIMAT0006778	33	47	44	41	45	50	32	35	30	28
Endogenous1	hsa-miR-516a-5p	MIMAT0004770	16	19	23	22	20	26	22	29	16	17
Endogenous1	hsa-miR-516b-5p	MIMAT0002859	17	26	36	17	33	23	23	25	11	16
Endogenous1	hsa-miR-517a-3p	MIMAT0002852	19	33	42	26	34	23	45	46	27	40
Endogenous1	hsa-miR-517b-3p	MIMAT0002857	17	17	24	17	24	20	26	23	14	22
Endogenous1	hsa-miR-517c-3p+hsa-miR-519a-3p	MIMAT0002866	18	17	23	22	26	19	29	23	11	11
Endogenous1	hsa-miR-518b	MIMAT0002844	19	24	32	37	38	30	39	33	27	22
Endogenous1	hsa-miR-518c-3p	MIMAT0002848	26	23	28	23	37	27	25	27	27	23
Endogenous1	hsa-miR-518d-3p	MIMAT0002864	11	12	22	16	18	24	18	32	13	19
Endogenous1	hsa-miR-518e-3p	MIMAT0002861	7	13	21	15	19	20	15	20	11	9
Endogenous1	hsa-miR-518f-3p	MIMAT0002842	26	43	33	35	39	38	47	51	24	32
Endogenous1	hsa-miR-5196-3p+hsa-miR-6732-3p	MIMAT0021129	22	26	37	24	21	26	36	38	29	22
Endogenous1	hsa-miR-5196-5p	MIMAT0021128	33	48	30	32	41	31	46	63	26	26
Endogenous1	hsa-miR-519b-3p	MIMAT0002837	19	15	28	21	29	23	25	27	15	21
Endogenous1	hsa-miR-519b-5p+hsa-miR-519c-5p+hsa-miR-523-5p+hsa-miR-518e-5p+hsa-miR-522-5p+hsa-miR-519a-5p	MIMAT0005454	25	34	31	31	33	35	35	43	38	24
Endogenous1	hsa-miR-519c-3p	MIMAT0002832	15	15	35	26	21	26	30	32	13	17
Endogenous1	hsa-miR-519d-3p	MIMAT0002853	29	22	31	29	33	18	34	34	43	31
Endogenous1	hsa-miR-519e-3p	MIMAT0002829	12	27	26	17	26	33	27	31	19	18
Endogenous1	hsa-miR-520a-3p	MIMAT0002834	11	14	21	13	8	9	16	15	9	8
Endogenous1	hsa-miR-520a-5p	MIMAT0002833	28	35	51	43	47	42	38	46	38	33
Endogenous1	hsa-miR-520b	MIMAT0002843	17	28	22	23	32	26	33	32	19	27
Endogenous1	hsa-miR-520c-3p	MIMAT0002846	32	42	37	49	45	42	65	64	32	43
Endogenous1	hsa-miR-520d-3p	MIMAT0002856	48	55	31	49	44	40	56	42	45	42
Endogenous1	hsa-miR-520d-5p+hsa-miR-527+hsa-miR-518a-5p	MIMAT0002855	32	32	41	44	22	34	36	41	25	26
Endogenous1	hsa-miR-520e	MIMAT0002825	16	13	22	16	27	19	17	21	15	12
Endogenous1	hsa-miR-520f-3p	MIMAT0002830	38	53	49	53	50	36	40	59	40	20
Endogenous1	hsa-miR-520g-3p	MIMAT0002858	22	9	16	30	21	16	30	22	13	16
Endogenous1	hsa-miR-520h	MIMAT0002867	49	52	47	47	38	36	49	40	40	43
Endogenous1	hsa-miR-521	MIMAT0002854	25	14	25	16	18	25	21	18	23	19
Endogenous1	hsa-miR-522-3p	MIMAT0002868	49	41	28	31	41	45	35	49	27	44
Endogenous1	hsa-miR-523-3p	MIMAT0002840	22	35	30	16	23	26	30	37	15	21
Endogenous1	hsa-miR-524-3p	MIMAT0002850	18	18	24	16	24	22	22	24	19	18
Endogenous1	hsa-miR-525-3p	MIMAT0002839	17	14	14	6	22	14	24	14	17	7
Endogenous1	hsa-miR-525-5p	MIMAT0002838	41	31	48	28	56	34	34	45	29	36
Endogenous1	hsa-miR-526a+hsa-miR-518c-5p+hsa-miR-518d-5p	MIMAT0002845	16	25	37	28	28	26	31	45	27	28
Endogenous1	hsa-miR-526b-5p	MIMAT0002835	18	29	30	20	36	20	26	37	23	22
Endogenous1	hsa-miR-532-3p	MIMAT0004780	11	25	22	32	30	34	41	30	26	22
Endogenous1	hsa-miR-532-5p	MIMAT0002888	11	23	21	19	18	14	23	21	14	20
Endogenous1	hsa-miR-539-3p	MIMAT0022705	16	20	20	14	19	19	16	19	20	15
Endogenous1	hsa-miR-539-5p	MIMAT0003163	29	32	40	24	30	24	40	32	22	26
Endogenous1	hsa-miR-541-3p	MIMAT0004920	16	27	33	22	28	16	19	20	17	31
Endogenous1	hsa-miR-542-3p	MIMAT0003389	16	32	37	35	39	34	43	35	28	26
Endogenous1	hsa-miR-542-5p	MIMAT0003340	21	18	20	21	31	16	22	25	16	12
Endogenous1	hsa-miR-543	MIMAT0004954	30	50	46	48	38	33	47	34	38	20
Endogenous1	hsa-miR-544a	MIMAT0003164	32	25	34	31	30	17	30	35	22	34
Endogenous1	hsa-miR-545-3p	MIMAT0003165	26	24	36	25	25	24	27	36	17	19
Endogenous1	hsa-miR-548a-3p	MIMAT0003251	14	44	40	38	53	40	42	49	30	47
Endogenous1	hsa-miR-548a-5p	MIMAT0004803	38	34	33	40	39	33	49	44	32	19
Endogenous1	hsa-miR-548aa+hsa-miR-548t-3p	MIMAT0018447	122	164	131	88	1	22	34	58	87	60
Endogenous1	hsa-miR-548ad-3p	MIMAT0018946	37	36	42	46	32	41	51	55	34	36
Endogenous1	hsa-miR-548ah-5p	MIMAT0018972	149	152	146	132	123	192	125	160	160	135
Endogenous1	hsa-miR-548ai+hsa-miR-570-5p	MIMAT0018989	39	50	40	46	37	35	47	58	45	24
Endogenous1	hsa-miR-548ak	MIMAT0019013	6	24	28	22	22	23	22	31	16	21
Endogenous1	hsa-miR-548al	MIMAT0019024	47	69	91	63	89	67	91	101	43	59
Endogenous1	hsa-miR-548ar-3p	MIMAT0022266	29	48	47	50	48	32	47	66	42	40
Endogenous1	hsa-miR-548ar-5p	MIMAT0022265	5	1	1	1	1	1	1	1	15	1
Endogenous1	hsa-miR-548b-3p	MIMAT0003254	17	25	27	16	20	23	21	21	24	17
Endogenous1	hsa-miR-548c-5p+hsa-miR-548o-5p+hsa-miR-548am-5p	MIMAT0004806	18	16	20	20	14	17	18	20	13	17
Endogenous1	hsa-miR-548d-3p	MIMAT0003323	62	75	70	47	60	41	45	39	70	38
Endogenous1	hsa-miR-548d-5p	MIMAT0004812	20	25	29	16	28	20	36	41	18	17
Endogenous1	hsa-miR-548e-3p	MIMAT0005874	18	21	26	19	21	26	24	19	18	17
Endogenous1	hsa-miR-548e-5p	MIMAT0026736	33	28	24	19	37	37	39	50	33	29
Endogenous1	hsa-miR-548g-3p	MIMAT0005912	165	201	179	161	151	136	149	160	123	109
Endogenous1	hsa-miR-548h-5p	MIMAT0005928	10	23	14	13	21	20	13	15	16	12
Endogenous1	hsa-miR-548i	MIMAT0005935	22	32	36	32	26	39	32	32	26	29
Endogenous1	hsa-miR-548j-3p	MIMAT0026737	30	28	39	23	25	33	44	50	23	30
Endogenous1	hsa-miR-548j-5p	MIMAT0005875	21	16	25	25	32	26	25	28	25	25
Endogenous1	hsa-miR-548k	MIMAT0005882	48	32	42	35	44	55	41	40	35	30
Endogenous1	hsa-miR-548l	MIMAT0005889	27	31	39	37	36	41	39	40	31	33
Endogenous1	hsa-miR-548m	MIMAT0005917	25	32	33	26	34	29	30	36	23	27
Endogenous1	hsa-miR-548n	MIMAT0005916	112	125	105	108	83	84	76	82	60	54
Endogenous1	hsa-miR-548o-3p+hsa-miR-548ah-3p+hsa-miR-548av-3p	MIMAT0005919	14	18	24	25	30	21	23	23	24	21
Endogenous1	hsa-miR-548q	MIMAT0011163	201	285	279	214	152	145	249	221	272	159
Endogenous1	hsa-miR-548v	MIMAT0015020	30	49	58	44	41	39	52	56	42	44
Endogenous1	hsa-miR-548y	MIMAT0018354	79	96	64	62	85	89	65	64	62	66
Endogenous1	hsa-miR-548z+hsa-miR-548h-3p	MIMAT0018446	33	36	39	33	38	35	29	44	28	21
Endogenous1	hsa-miR-549a	MIMAT0003333	244	320	277	185	144	162	210	221	211	189
Endogenous1	hsa-miR-550a-5p	MIMAT0004800	17	14	17	22	19	16	23	22	5	11
Endogenous1	hsa-miR-551a	MIMAT0003214	68	94	105	90	99	93	116	110	49	83
Endogenous1	hsa-miR-551b-3p	MIMAT0003233	21	42	27	38	35	30	43	57	27	33
Endogenous1	hsa-miR-552-3p	MIMAT0003215	22	29	30	36	32	32	36	41	31	36
Endogenous1	hsa-miR-553	MIMAT0003216	70	68	67	51	55	89	42	62	78	70
Endogenous1	hsa-miR-554	MIMAT0003217	9	20	15	20	16	22	22	16	15	18
Endogenous1	hsa-miR-555	MIMAT0003219	16	23	26	20	25	31	30	35	14	18
Endogenous1	hsa-miR-556-3p	MIMAT0004793	11	34	26	25	17	29	17	20	17	18
Endogenous1	hsa-miR-556-5p	MIMAT0003220	32	30	33	26	44	24	36	35	31	23
Endogenous1	hsa-miR-561-3p	MIMAT0003225	22	33	28	20	20	22	21	31	16	24
Endogenous1	hsa-miR-561-5p	MIMAT0022706	23	17	33	21	26	20	20	31	14	18
Endogenous1	hsa-miR-562	MIMAT0003226	10	14	22	19	18	12	22	27	9	19
Endogenous1	hsa-miR-563	MIMAT0003227	18	28	30	17	47	24	31	27	18	27
Endogenous1	hsa-miR-564	MIMAT0003228	14	16	20	18	24	26	28	32	17	10
Endogenous1	hsa-miR-566	MIMAT0003230	29	29	25	35	33	24	37	31	22	32
Endogenous1	hsa-miR-567	MIMAT0003231	30	55	49	44	52	35	43	42	27	34
Endogenous1	hsa-miR-568	MIMAT0003232	20	23	27	29	33	25	21	28	19	29
Endogenous1	hsa-miR-570-3p	MIMAT0003235	22	38	1	1	1	1	1	1	12	1
Endogenous1	hsa-miR-571	MIMAT0003236	31	31	35	33	34	31	22	34	17	35
Endogenous1	hsa-miR-572	MIMAT0003237	21	24	24	28	26	35	22	35	18	19
Endogenous1	hsa-miR-573	MIMAT0003238	25	29	21	38	24	36	37	33	24	29
Endogenous1	hsa-miR-574-3p	MIMAT0003239	24	21	22	32	20	19	18	25	17	19
Endogenous1	hsa-miR-574-5p	MIMAT0004795	21	29	32	30	31	28	31	37	27	34
Endogenous1	hsa-miR-575	MIMAT0003240	32	38	48	44	42	41	44	49	30	39
Endogenous1	hsa-miR-576-3p	MIMAT0004796	17	21	23	17	28	20	28	27	19	13
Endogenous1	hsa-miR-576-5p	MIMAT0003241	20	36	42	24	47	33	28	46	26	30
Endogenous1	hsa-miR-577	MIMAT0003242	55	74	54	56	65	52	55	57	44	46
Endogenous1	hsa-miR-578	MIMAT0003243	13	16	21	22	27	29	25	32	16	12
Endogenous1	hsa-miR-579-3p	MIMAT0003244	956	1080	293	1	1	1	1	1	1	1
Endogenous1	hsa-miR-579-5p	MIMAT0026616	17	27	19	21	26	23	27	26	16	19
Endogenous1	hsa-miR-580-3p	MIMAT0003245	17	16	20	17	21	12	16	29	8	25
Endogenous1	hsa-miR-582-3p	MIMAT0004797	25	24	33	26	27	31	26	29	21	19
Endogenous1	hsa-miR-582-5p	MIMAT0003247	13	23	31	20	28	25	26	30	17	26
Endogenous1	hsa-miR-584-3p	MIMAT0022708	24	31	43	29	42	32	46	54	28	38
Endogenous1	hsa-miR-584-5p	MIMAT0003249	23	27	33	29	41	42	39	40	26	21
Endogenous1	hsa-miR-585-3p	MIMAT0003250	88	77	78	64	79	100	61	79	75	77
Endogenous1	hsa-miR-587	MIMAT0003253	56	44	58	36	49	39	40	47	54	41
Endogenous1	hsa-miR-589-5p	MIMAT0004799	23	25	20	30	32	23	14	35	18	16
Endogenous1	hsa-miR-590-3p	MIMAT0004801	18	12	26	11	20	14	26	17	15	25
Endogenous1	hsa-miR-590-5p	MIMAT0003258	147	214	213	154	135	105	186	187	130	123
Endogenous1	hsa-miR-591	MIMAT0003259	20	31	24	26	32	35	30	26	21	27
Endogenous1	hsa-miR-592	MIMAT0003260	24	30	35	34	30	31	39	31	32	32
Endogenous1	hsa-miR-593-3p	MIMAT0004802	41	35	38	33	47	27	36	48	35	29
Endogenous1	hsa-miR-595	MIMAT0003263	23	27	31	25	32	22	33	39	21	28
Endogenous1	hsa-miR-596	MIMAT0003264	22	27	29	20	25	25	32	29	20	17
Endogenous1	hsa-miR-597-5p	MIMAT0003265	44	41	46	31	52	44	49	47	32	42
Endogenous1	hsa-miR-598-3p	MIMAT0003266	64	77	93	75	95	93	79	96	50	61
Endogenous1	hsa-miR-599	MIMAT0003267	9	8	14	15	19	11	14	10	17	11
Endogenous1	hsa-miR-600	MIMAT0003268	8	22	18	18	17	16	16	14	12	16
Endogenous1	hsa-miR-601	MIMAT0003269	29	25	24	30	33	32	35	33	23	25
Endogenous1	hsa-miR-603	MIMAT0003271	44	2	1	1	1	1	1	1	31	1
Endogenous1	hsa-miR-604	MIMAT0003272	18	19	22	22	27	15	17	22	13	11
Endogenous1	hsa-miR-605-5p	MIMAT0003273	18	24	22	18	37	29	30	29	21	22
Endogenous1	hsa-miR-606	MIMAT0003274	46	35	31	32	33	45	36	33	37	33
Endogenous1	hsa-miR-607	MIMAT0003275	26	50	59	44	60	51	45	66	44	37
Endogenous1	hsa-miR-608	MIMAT0003276	21	36	23	24	23	26	34	32	24	24
Endogenous1	hsa-miR-610	MIMAT0003278	31	24	37	30	29	16	22	35	22	13
Endogenous1	hsa-miR-612	MIMAT0003280	95	109	126	100	102	97	97	116	119	87
Endogenous1	hsa-miR-613	MIMAT0003281	15	35	28	16	29	25	28	33	18	19
Endogenous1	hsa-miR-614	MIMAT0003282	16	27	20	17	23	19	21	30	17	14
Endogenous1	hsa-miR-615-3p	MIMAT0003283	30	29	23	21	28	24	34	36	22	32
Endogenous1	hsa-miR-615-5p	MIMAT0004804	13	23	27	27	40	22	19	32	10	24
Endogenous1	hsa-miR-616-3p	MIMAT0004805	17	27	21	31	32	35	25	35	23	32
Endogenous1	hsa-miR-617	MIMAT0003286	12	29	32	26	31	30	31	41	13	25
Endogenous1	hsa-miR-619-3p	MIMAT0003288	13	15	23	14	23	23	19	20	12	12
Endogenous1	hsa-miR-620	MIMAT0003289	12	26	24	22	29	19	24	30	23	25
Endogenous1	hsa-miR-624-3p	MIMAT0004807	19	17	15	12	14	24	27	35	9	11
Endogenous1	hsa-miR-625-5p	MIMAT0003294	42	51	43	43	34	35	36	50	43	32
Endogenous1	hsa-miR-626	MIMAT0003295	36	30	28	33	38	51	45	49	22	36
Endogenous1	hsa-miR-627-3p	MIMAT0026623	26	43	36	37	35	27	41	38	33	33
Endogenous1	hsa-miR-627-5p	MIMAT0003296	22	1	1	1	1	1	1	1	22	1
Endogenous1	hsa-miR-628-3p	MIMAT0003297	9	23	17	30	18	18	28	29	14	16
Endogenous1	hsa-miR-628-5p	MIMAT0004809	10	9	19	14	22	19	17	16	15	16
Endogenous1	hsa-miR-629-5p	MIMAT0004810	28	28	38	29	23	36	45	41	37	25
Endogenous1	hsa-miR-630	MIMAT0003299	33	43	58	34	31	34	44	52	46	38
Endogenous1	hsa-miR-631	MIMAT0003300	9	13	19	22	16	17	19	19	7	13
Endogenous1	hsa-miR-637	MIMAT0003307	17	19	19	17	25	22	21	18	16	12
Endogenous1	hsa-miR-638	MIMAT0003308	20	18	24	22	34	15	27	23	18	16
Endogenous1	hsa-miR-639	MIMAT0003309	9	20	20	14	23	11	21	21	22	19
Endogenous1	hsa-miR-640	MIMAT0003310	40	38	43	29	44	31	32	50	28	14
Endogenous1	hsa-miR-641	MIMAT0003311	11	21	20	19	18	16	31	22	13	16
Endogenous1	hsa-miR-642a-3p	MIMAT0020924	18	21	16	13	23	18	15	23	12	15
Endogenous1	hsa-miR-642a-5p	MIMAT0003312	15	15	26	26	20	24	25	22	27	16
Endogenous1	hsa-miR-643	MIMAT0003313	27	44	47	36	56	46	37	45	18	22
Endogenous1	hsa-miR-644a	MIMAT0003314	369	507	468	355	337	267	441	407	332	319
Endogenous1	hsa-miR-648	MIMAT0003318	32	38	37	28	44	35	48	50	38	41
Endogenous1	hsa-miR-649	MIMAT0003319	24	18	20	27	27	17	20	16	22	17
Endogenous1	hsa-miR-650	MIMAT0003320	15	22	18	23	23	29	24	25	18	17
Endogenous1	hsa-miR-6503-3p	MIMAT0025463	15	28	33	10	22	26	24	34	16	18
Endogenous1	hsa-miR-6503-5p	MIMAT0025462	20	28	29	21	22	22	21	33	25	21
Endogenous1	hsa-miR-651-3p	MIMAT0026624	21	19	13	17	22	22	21	22	13	9
Endogenous1	hsa-miR-651-5p	MIMAT0003321	27	24	35	21	30	37	31	45	20	30
Endogenous1	hsa-miR-6511a-3p	MIMAT0025479	11	12	14	8	10	9	16	11	9	8
Endogenous1	hsa-miR-6511a-5p	MIMAT0025478	28	26	20	16	22	19	26	33	20	18
Endogenous1	hsa-miR-652-3p	MIMAT0003322	7	11	11	14	15	12	19	13	7	13
Endogenous1	hsa-miR-652-5p	MIMAT0022709	19	20	29	20	22	23	27	31	16	16
Endogenous1	hsa-miR-654-3p	MIMAT0004814	14	17	19	21	17	25	22	32	11	16
Endogenous1	hsa-miR-654-5p	MIMAT0003330	19	23	22	38	40	25	32	38	16	23
Endogenous1	hsa-miR-655-3p	MIMAT0003331	13	9	16	19	23	19	17	23	10	11
Endogenous1	hsa-miR-656-3p	MIMAT0003332	40	58	55	49	44	60	50	47	48	32
Endogenous1	hsa-miR-660-3p	MIMAT0022711	22	38	43	36	27	30	34	37	21	24
Endogenous1	hsa-miR-660-5p	MIMAT0003338	21	16	18	15	16	25	21	27	18	15
Endogenous1	hsa-miR-661	MIMAT0003324	28	32	32	30	45	44	47	39	23	40
Endogenous1	hsa-miR-663a	MIMAT0003326	28	42	45	38	33	38	47	53	32	45
Endogenous1	hsa-miR-664a-3p	MIMAT0005949	21	31	28	31	25	24	23	30	25	18
Endogenous1	hsa-miR-664b-3p	MIMAT0022272	31	36	29	24	28	30	35	37	34	40
Endogenous1	hsa-miR-664b-5p	MIMAT0022271	15	16	31	9	27	18	28	25	18	12
Endogenous1	hsa-miR-665	MIMAT0004952	12	28	30	35	46	24	28	39	23	21
Endogenous1	hsa-miR-671-3p	MIMAT0004819	15	17	29	22	20	19	9	20	12	6
Endogenous1	hsa-miR-671-5p	MIMAT0003880	38	36	55	34	42	44	40	50	42	32
Endogenous1	hsa-miR-6720-3p	MIMAT0025851	14	20	22	17	23	25	23	29	19	18
Endogenous1	hsa-miR-6721-5p	MIMAT0025852	86	123	128	129	127	109	150	165	90	112
Endogenous1	hsa-miR-6724-5p	MIMAT0025856	28	36	34	34	38	28	47	54	30	20
Endogenous1	hsa-miR-675-5p	MIMAT0004284	20	23	26	21	17	16	25	22	15	21
Endogenous1	hsa-miR-7-5p	MIMAT0000252	64	51	62	45	56	42	54	55	57	42
Endogenous1	hsa-miR-708-5p	MIMAT0004926	19	18	22	16	20	17	25	24	10	21
Endogenous1	hsa-miR-744-5p	MIMAT0004945	37	43	42	30	39	33	45	47	33	33
Endogenous1	hsa-miR-758-3p+hsa-miR-411-3p	MIMAT0003879	24	29	29	25	32	19	31	32	20	14
Endogenous1	hsa-miR-758-5p	MIMAT0022929	16	23	16	11	24	23	17	17	17	25
Endogenous1	hsa-miR-760	MIMAT0004957	18	18	20	22	26	18	27	30	22	19
Endogenous1	hsa-miR-761	MIMAT0010364	60	61	56	63	88	69	69	81	37	66
Endogenous1	hsa-miR-764	MIMAT0010367	18	19	26	24	29	34	23	38	26	32
Endogenous1	hsa-miR-765	MIMAT0003945	18	21	24	22	37	22	37	28	26	35
Endogenous1	hsa-miR-766-3p	MIMAT0003888	20	28	25	48	27	38	40	39	20	35
Endogenous1	hsa-miR-766-5p	MIMAT0022714	8	22	20	6	18	27	24	17	14	14
Endogenous1	hsa-miR-767-3p	MIMAT0003883	14	22	34	21	14	21	18	23	10	22
Endogenous1	hsa-miR-767-5p	MIMAT0003882	17	22	28	19	24	21	24	16	14	15
Endogenous1	hsa-miR-769-3p	MIMAT0003887	12	17	24	13	19	22	20	19	11	14
Endogenous1	hsa-miR-769-5p	MIMAT0003886	32	30	38	37	37	44	43	46	37	32
Endogenous1	hsa-miR-770-5p	MIMAT0003948	22	31	31	30	47	37	33	26	16	28
Endogenous1	hsa-miR-802	MIMAT0004185	28	23	45	34	40	30	28	41	28	23
Endogenous1	hsa-miR-873-3p	MIMAT0022717	63	73	96	65	111	100	124	113	54	74
Endogenous1	hsa-miR-873-5p	MIMAT0004953	49	61	46	46	37	39	48	52	49	38
Endogenous1	hsa-miR-874-3p	MIMAT0004911	20	22	28	23	15	22	20	22	25	16
Endogenous1	hsa-miR-874-5p	MIMAT0026718	19	29	23	23	31	21	22	23	15	26
Endogenous1	hsa-miR-875-3p	MIMAT0004923	20	16	29	20	38	26	32	22	16	12
Endogenous1	hsa-miR-876-3p	MIMAT0004925	17	32	35	24	28	28	30	47	33	24
Endogenous1	hsa-miR-876-5p	MIMAT0004924	4	11	15	6	14	11	14	13	10	11
Endogenous1	hsa-miR-877-5p	MIMAT0004949	41	51	37	40	51	26	40	51	36	28
Endogenous1	hsa-miR-885-3p	MIMAT0004948	18	22	28	29	34	20	30	30	25	25
Endogenous1	hsa-miR-885-5p	MIMAT0004947	42	60	27	21	31	30	14	34	24	28
Endogenous1	hsa-miR-887-3p	MIMAT0004951	20	28	26	18	21	25	24	26	19	19
Endogenous1	hsa-miR-887-5p	MIMAT0026720	23	17	24	22	22	27	23	31	21	18
Endogenous1	hsa-miR-888-5p	MIMAT0004916	74	93	86	55	68	59	68	69	90	77
Endogenous1	hsa-miR-889-3p	MIMAT0004921	23	19	24	25	40	22	17	19	14	15
Endogenous1	hsa-miR-890	MIMAT0004912	22	40	24	38	35	31	26	35	29	25
Endogenous1	hsa-miR-891a-5p	MIMAT0004902	22	21	30	28	38	19	47	38	25	27
Endogenous1	hsa-miR-891b	MIMAT0004913	55	62	75	54	83	76	92	99	57	53
Endogenous1	hsa-miR-892a	MIMAT0004907	15	27	37	33	21	18	32	38	22	22
Endogenous1	hsa-miR-892b	MIMAT0004918	18	21	19	12	32	24	32	23	15	12
Endogenous1	hsa-miR-9-5p	MIMAT0000441	9	18	25	14	20	19	22	23	17	14
Endogenous1	hsa-miR-922	MIMAT0004972	39	52	60	45	65	54	74	72	31	41
Endogenous1	hsa-miR-924	MIMAT0004974	6	14	7	17	17	12	16	21	6	17
Endogenous1	hsa-miR-92a-1-5p	MIMAT0004507	19	35	29	23	38	18	29	29	20	26
Endogenous1	hsa-miR-92a-3p	MIMAT0000092	71	87	24	115	47	27	30	47	17	38
Endogenous1	hsa-miR-92b-3p	MIMAT0003218	22	26	31	25	34	19	35	33	14	25
Endogenous1	hsa-miR-93-5p	MIMAT0000093	33	55	29	103	30	27	29	36	17	21
Endogenous1	hsa-miR-933	MIMAT0004976	24	13	29	38	36	35	29	30	26	25
Endogenous1	hsa-miR-934	MIMAT0004977	19	15	29	32	26	24	26	36	14	13
Endogenous1	hsa-miR-935	MIMAT0004978	10	20	21	17	20	15	12	21	8	23
Endogenous1	hsa-miR-936	MIMAT0004979	15	30	26	29	38	17	25	35	21	22
Endogenous1	hsa-miR-937-3p	MIMAT0004980	18	21	33	18	38	34	36	42	17	25
Endogenous1	hsa-miR-939-5p	MIMAT0004982	29	41	45	29	35	35	33	39	24	27
Endogenous1	hsa-miR-940	MIMAT0004983	8	10	29	17	20	21	18	11	13	14
Endogenous1	hsa-miR-941	MIMAT0004984	19	21	22	14	22	20	21	30	16	12
Endogenous1	hsa-miR-942-3p	MIMAT0026734	15	16	16	11	12	22	20	15	12	18
Endogenous1	hsa-miR-942-5p	MIMAT0004985	52	68	64	50	45	36	43	44	39	30
Endogenous1	hsa-miR-944	MIMAT0004987	16	35	34	15	26	16	26	37	25	23
Endogenous1	hsa-miR-95-3p	MIMAT0000094	18	26	40	28	40	30	36	35	26	23
Endogenous1	hsa-miR-96-5p	MIMAT0000095	20	24	33	33	38	32	37	35	21	30
Endogenous1	hsa-miR-98-3p	MIMAT0022842	23	37	26	27	39	34	32	36	29	32
Endogenous1	hsa-miR-98-5p	MIMAT0000096	58	57	46	46	63	79	58	61	81	63
Endogenous1	hsa-miR-99a-5p	MIMAT0000097	19	18	31	27	26	16	33	28	16	19
Endogenous1	hsa-miR-99b-5p	MIMAT0000689	22	20	29	37	21	19	26	32	13	20
Housekeeping	ACTB	NM_001101.2	23	33	43	34	48	50	53	46	27	34
Housekeeping	B2M	NM_004048.2	26	39	43	33	45	38	43	51	38	44
Housekeeping	GAPDH	NM_002046.3	22	31	28	26	39	33	31	36	23	17
Housekeeping	RPL19	NM_000981.3	20	23	22	28	23	26	27	29	9	21
Housekeeping	RPLP0	NM_001002.3	7	11	25	15	15	17	15	14	9	12
