# Supplementary material for: Vitamin C supplementation reduces expression of circulating miR-451a in subjects with poorly controlled type 2 diabetes mellitus and high oxidative stress
Source: PeerJ journal article supplement (doi:10.7717/peerj.10776), 2021-02-04
Supplement: GEO_LR.zip [file miRNA_Log2 normalized counts_5N.xls]

## Sheet: miRNA_Log2 normalized counts _5
Sample	Type	SN15BF	SN15AF	SN16BF	SN16AF	SN18BF	SN18AF	SN20BF	SN20AF	SN22BF	SN22AF
Treatment	Intervention	1. Pre-vitC	2. Post-vitC	1. Pre-vitC	2. Post-vitC	1. Pre-vitC	2. Post-vitC	1. Pre-vitC	2. Post-vitC	1. Pre-vitC	2. Post-vitC
hsa-let-7a-5p	Numeric	6.64	6.64	6.64	6.64	6.64	6.64	6.64	6.64	6.64	6.64
hsa-let-7b-5p	Numeric	6.64	6.64	6.64	6.64	6.64	6.64	6.64	6.64	6.64	6.64
hsa-let-7c-5p	Numeric	6.64	6.64	6.64	6.64	6.64	6.64	6.64	6.64	6.64	6.64
hsa-let-7d-5p	Numeric	6.64	6.64	6.64	6.64	6.64	6.64	6.64	6.64	6.64	6.64
hsa-let-7e-5p	Numeric	6.64	6.64	6.64	6.64	6.64	6.64	6.64	6.64	6.64	6.64
hsa-let-7f-5p	Numeric	6.64	6.64	6.64	6.64	6.64	6.64	6.64	6.64	6.64	6.64
hsa-let-7g-5p	Numeric	6.64	6.64	6.64	6.64	6.64	6.64	6.64	6.64	6.64	6.64
hsa-let-7i-5p	Numeric	6.64	6.64	6.64	6.64	6.64	6.64	6.64	6.64	6.64	6.64
hsa-miR-1-3p	Numeric	6.64	6.64	6.64	6.64	6.64	6.64	6.64	6.64	6.64	6.64
hsa-miR-1-5p	Numeric	6.64	6.64	6.64	6.64	6.64	6.64	6.64	6.64	6.64	6.64
hsa-miR-100-5p	Numeric	6.64	6.64	6.64	6.64	6.64	6.64	6.64	6.64	6.64	6.64
hsa-miR-101-3p	Numeric	6.64	6.64	6.64	6.64	6.64	6.64	6.64	6.64	6.64	6.64
hsa-miR-103a-3p	Numeric	6.64	6.64	6.64	6.64	6.64	6.64	6.64	6.64	6.64	6.64
hsa-miR-105-5p	Numeric	6.64	6.64	6.64	6.64	6.64	6.64	6.64	6.64	6.64	6.64
hsa-miR-106a-5p+hsa-miR-17-5p	Numeric	6.64	6.64	6.64	6.64	6.64	6.64	6.64	6.64	6.64	6.64
hsa-miR-106b-5p	Numeric	6.64	6.64	6.64	6.64	6.64	6.64	6.64	6.64	6.64	6.64
hsa-miR-107	Numeric	6.64	6.64	6.64	6.64	6.64	6.64	6.64	6.64	6.64	6.64
hsa-miR-10a-5p	Numeric	6.64	6.64	6.64	6.64	6.64	6.64	6.64	6.64	6.64	6.64
hsa-miR-10b-5p	Numeric	6.64	6.64	6.64	6.64	6.64	6.64	6.64	6.64	6.64	6.64
hsa-miR-1178-3p	Numeric	6.64	6.64	6.64	6.64	6.64	6.64	6.64	6.64	6.64	6.64
hsa-miR-1180-3p	Numeric	6.64	6.64	6.64	6.64	6.64	6.64	6.64	6.64	6.64	6.64
hsa-miR-1183	Numeric	6.64	6.64	6.64	6.64	6.64	6.64	6.64	6.64	6.64	6.64
hsa-miR-1185-1-3p	Numeric	6.64	6.64	6.64	6.64	6.64	6.64	6.64	6.64	6.64	6.64
hsa-miR-1185-2-3p	Numeric	6.64	6.64	6.64	6.64	7.11	6.64	6.64	6.64	6.64	6.64
hsa-miR-1185-5p	Numeric	6.64	6.64	6.64	6.64	6.64	6.64	6.64	6.64	6.64	6.64
hsa-miR-1193	Numeric	6.64	6.64	6.64	6.64	6.64	6.64	6.64	6.64	6.64	6.64
hsa-miR-1197	Numeric	6.64	6.64	6.64	6.64	6.64	6.64	6.64	6.64	6.64	6.64
hsa-miR-1200	Numeric	6.64	6.64	6.64	6.64	6.64	6.64	6.64	6.64	6.64	6.64
hsa-miR-1202	Numeric	6.64	6.64	6.64	6.64	6.64	6.64	6.64	6.64	6.64	6.64
hsa-miR-1203	Numeric	6.64	6.64	6.64	6.64	6.64	6.64	6.64	6.64	6.64	6.64
hsa-miR-1204	Numeric	6.64	6.64	6.64	6.64	6.64	6.64	6.64	6.64	6.64	6.64
hsa-miR-1205	Numeric	6.64	6.64	6.64	6.64	6.64	6.64	6.64	6.64	6.64	6.64
hsa-miR-1206	Numeric	6.64	6.64	6.64	6.64	7.08	6.64	6.64	6.64	6.64	6.64
hsa-miR-122-5p	Numeric	8.39	8.28	6.64	7.27	7.5	7.45	7.99	7.56	6.64	8.41
hsa-miR-1224-3p	Numeric	6.64	6.64	6.64	6.64	6.64	6.64	6.64	6.64	6.64	6.64
hsa-miR-1224-5p	Numeric	6.64	6.64	6.64	6.64	6.64	6.64	6.64	6.64	6.64	6.64
hsa-miR-1226-3p	Numeric	6.64	6.64	6.64	6.64	6.64	6.64	6.64	6.64	6.64	6.64
hsa-miR-1228-3p	Numeric	6.64	6.64	6.64	6.64	6.64	6.64	6.64	6.64	6.64	6.64
hsa-miR-1233-3p	Numeric	6.64	6.64	6.64	6.64	6.64	6.64	6.64	6.64	6.64	6.64
hsa-miR-1234-3p	Numeric	6.64	6.64	6.64	6.64	6.64	6.64	6.64	6.64	6.64	6.64
hsa-miR-1236-3p	Numeric	6.64	6.64	6.64	6.64	6.64	6.64	6.64	6.64	6.64	6.64
hsa-miR-124-3p	Numeric	6.64	6.64	6.64	6.64	6.64	6.64	6.64	6.64	6.64	6.64
hsa-miR-1244	Numeric	6.64	6.64	6.64	6.64	6.64	6.64	6.64	6.64	6.64	6.64
hsa-miR-1245a	Numeric	6.64	6.64	6.64	6.64	6.64	6.64	6.64	6.64	6.64	6.64
hsa-miR-1245b-3p	Numeric	6.64	6.64	6.64	6.64	6.64	6.64	6.64	6.64	6.64	6.64
hsa-miR-1245b-5p	Numeric	6.64	6.64	6.64	6.64	6.64	6.64	6.64	6.64	6.64	6.64
hsa-miR-1246	Numeric	6.64	6.64	6.64	6.64	6.64	6.64	6.64	6.64	6.64	6.64
hsa-miR-1247-5p	Numeric	6.64	6.64	6.64	6.64	6.64	6.64	6.64	6.64	6.64	6.64
hsa-miR-1248	Numeric	6.64	6.64	6.64	6.64	6.64	6.64	6.64	6.64	6.64	6.64
hsa-miR-1249-3p	Numeric	6.64	6.64	6.64	6.64	6.64	6.64	6.64	6.64	6.64	6.64
hsa-miR-1249-5p	Numeric	6.64	6.64	6.64	6.64	6.64	6.64	6.64	6.64	6.64	6.64
hsa-miR-1250-5p	Numeric	6.64	6.64	6.64	6.64	6.64	6.64	6.64	6.64	6.64	6.64
hsa-miR-1252-5p	Numeric	6.64	6.64	6.64	6.64	6.64	6.64	6.64	6.64	6.64	6.64
hsa-miR-1253	Numeric	9.16	9.67	8.71	9.86	8.7	9.23	9.8	9.86	10.16	11.05
hsa-miR-1254	Numeric	6.64	6.64	6.64	6.64	6.64	6.64	6.64	6.64	6.64	6.64
hsa-miR-1255a	Numeric	6.64	6.64	6.64	6.64	6.64	6.64	6.64	6.64	6.64	6.64
hsa-miR-1255b-5p	Numeric	6.64	6.64	6.64	6.64	6.64	6.64	6.64	6.64	6.64	6.64
hsa-miR-1257	Numeric	6.64	6.64	6.64	6.64	6.64	6.64	6.64	6.64	6.64	6.64
hsa-miR-1258	Numeric	6.64	6.64	6.64	6.64	6.64	6.64	6.64	6.64	6.64	6.64
hsa-miR-125a-3p	Numeric	6.64	6.64	6.64	6.64	6.64	6.64	6.64	6.64	6.64	6.64
hsa-miR-125a-5p	Numeric	6.64	6.64	6.64	6.64	6.64	6.64	6.64	6.64	6.64	6.64
hsa-miR-125b-5p	Numeric	6.64	6.64	6.64	6.64	6.64	6.64	6.64	6.64	6.64	6.64
hsa-miR-126-3p	Numeric	6.64	6.64	6.64	6.64	6.64	6.64	6.64	6.64	6.64	6.64
hsa-miR-1260a	Numeric	6.64	6.64	6.64	6.64	6.64	6.64	6.64	6.64	6.64	6.64
hsa-miR-1260b	Numeric	6.64	6.64	6.64	6.64	6.64	6.64	6.64	6.64	6.64	6.64
hsa-miR-1261	Numeric	6.64	6.64	6.64	6.64	6.64	6.64	6.64	6.64	6.64	6.64
hsa-miR-1262	Numeric	6.64	6.64	6.64	6.64	6.64	6.64	6.64	6.64	6.64	6.64
hsa-miR-1264	Numeric	6.64	6.64	6.64	6.64	6.64	6.64	6.64	6.64	6.64	6.64
hsa-miR-1266-5p	Numeric	6.64	6.64	6.64	6.64	6.64	6.64	6.64	6.64	6.64	6.64
hsa-miR-1268a	Numeric	6.64	6.64	6.64	6.64	6.64	6.64	6.64	6.64	6.64	6.64
hsa-miR-1268b	Numeric	6.64	6.64	6.64	6.64	6.64	6.64	6.64	6.64	6.64	6.64
hsa-miR-1269a	Numeric	6.64	6.64	6.64	6.64	6.64	6.64	6.64	6.64	6.64	6.64
hsa-miR-1269b	Numeric	6.64	6.64	6.64	6.64	6.64	6.64	6.64	6.64	6.64	6.64
hsa-miR-127-3p	Numeric	6.64	6.64	6.64	6.64	6.64	6.64	6.64	6.64	6.64	6.64
hsa-miR-127-5p	Numeric	6.64	6.64	6.64	6.64	6.64	6.64	6.64	6.64	6.64	6.64
hsa-miR-1270	Numeric	6.64	6.64	6.64	6.64	6.64	6.64	6.64	6.64	6.64	6.64
hsa-miR-1271-3p	Numeric	6.64	6.64	6.64	6.64	6.64	6.64	6.64	6.64	6.64	6.64
hsa-miR-1271-5p	Numeric	6.64	6.64	6.64	6.64	6.64	6.64	6.64	6.64	6.64	6.64
hsa-miR-1272	Numeric	6.64	6.64	6.64	6.64	6.64	6.64	6.64	6.64	6.64	6.64
hsa-miR-1273c	Numeric	6.64	6.64	6.64	6.64	6.64	6.64	6.64	6.64	6.64	6.64
hsa-miR-1275	Numeric	6.64	6.64	6.64	6.64	6.64	6.64	6.64	6.64	6.64	6.64
hsa-miR-1276	Numeric	6.64	6.64	6.64	6.64	6.64	6.64	6.64	6.64	6.64	6.64
hsa-miR-1277-3p	Numeric	6.64	6.64	6.64	6.64	6.64	6.64	6.64	6.64	6.64	6.64
hsa-miR-1278	Numeric	6.64	6.64	6.64	6.64	6.64	6.64	6.64	6.64	6.64	6.64
hsa-miR-1279	Numeric	6.64	6.64	6.64	6.64	6.64	6.64	6.64	6.64	6.64	6.64
hsa-miR-128-1-5p	Numeric	6.64	6.64	6.64	6.64	6.64	6.64	6.64	6.64	6.64	6.64
hsa-miR-128-2-5p	Numeric	6.64	6.64	6.64	6.64	6.64	6.64	6.64	6.64	6.64	6.64
hsa-miR-128-3p	Numeric	6.64	6.64	6.64	6.64	6.64	6.64	6.64	6.64	6.64	6.64
hsa-miR-1281	Numeric	6.64	6.64	6.64	6.64	6.64	6.64	6.64	6.64	6.64	6.64
hsa-miR-1283	Numeric	6.64	6.64	6.64	6.64	6.64	6.64	6.64	6.64	6.64	6.64
hsa-miR-1285-3p	Numeric	6.64	6.64	6.64	6.64	6.64	6.64	6.64	6.64	6.64	6.64
hsa-miR-1285-5p	Numeric	6.64	6.64	6.64	6.64	6.64	6.64	6.64	6.64	6.64	6.64
hsa-miR-1286	Numeric	6.64	6.64	6.64	6.64	6.64	6.64	6.64	6.64	6.64	6.64
hsa-miR-1287-3p	Numeric	6.64	6.64	6.64	6.64	6.64	6.64	6.64	6.64	6.64	6.64
hsa-miR-1287-5p	Numeric	6.64	6.64	6.64	6.64	6.64	6.64	6.64	6.64	6.64	6.64
hsa-miR-1288-3p	Numeric	6.64	6.64	6.64	6.64	6.64	6.64	6.64	6.64	6.64	6.64
hsa-miR-1289	Numeric	6.64	6.64	6.64	6.64	6.64	6.64	6.64	6.64	6.64	6.64
hsa-miR-129-2-3p	Numeric	6.64	6.64	6.64	6.64	6.64	6.64	6.64	6.64	6.64	6.64
hsa-miR-129-5p	Numeric	6.64	6.64	6.64	6.64	6.64	6.64	6.64	6.64	6.64	6.64
hsa-miR-1290	Numeric	6.73	7.67	6.64	6.98	7.06	7.59	7.8	7.8	8.35	9.22
hsa-miR-1291	Numeric	6.64	6.64	6.64	6.64	6.64	6.64	6.64	6.64	6.64	6.64
hsa-miR-1293	Numeric	6.64	6.64	6.64	6.64	6.64	6.64	6.64	6.64	6.64	6.64
hsa-miR-1295a	Numeric	6.64	6.64	6.64	6.64	6.64	6.64	6.64	6.64	6.64	6.64
hsa-miR-1296-3p	Numeric	6.64	6.64	6.64	6.64	6.64	6.64	6.64	6.64	6.64	6.64
hsa-miR-1296-5p	Numeric	6.64	6.64	6.64	6.64	6.64	6.64	6.64	6.64	6.64	6.64
hsa-miR-1297	Numeric	6.64	6.64	6.64	6.64	6.64	6.64	6.64	6.64	6.64	6.64
hsa-miR-1298-5p	Numeric	6.64	6.64	6.64	6.64	6.64	6.64	6.64	6.64	6.64	6.64
hsa-miR-1299	Numeric	6.64	6.64	6.64	6.64	6.64	6.64	6.64	6.64	6.64	6.64
hsa-miR-1301-3p	Numeric	6.64	6.64	6.64	6.64	6.64	6.64	6.64	6.64	6.64	6.64
hsa-miR-1302	Numeric	6.64	6.64	6.64	6.64	6.64	6.64	6.64	6.64	6.64	6.64
hsa-miR-1303	Numeric	6.64	6.64	6.64	6.64	6.64	6.64	6.64	6.64	6.64	6.64
hsa-miR-1304-3p	Numeric	6.64	6.64	6.64	6.64	6.64	6.64	6.64	6.64	6.64	6.64
hsa-miR-1304-5p	Numeric	6.64	6.64	6.64	6.64	6.64	6.64	6.64	6.64	6.64	6.64
hsa-miR-1305	Numeric	6.64	6.64	6.64	6.64	6.64	6.64	6.64	6.64	6.64	6.64
hsa-miR-1306-3p	Numeric	6.64	6.64	6.64	6.64	6.64	6.64	6.64	6.64	6.64	6.64
hsa-miR-1306-5p	Numeric	6.64	6.64	6.64	6.64	6.64	6.64	6.64	6.64	6.64	6.64
hsa-miR-1307-3p	Numeric	6.64	6.64	6.64	6.64	6.64	6.64	6.64	6.64	6.64	6.64
hsa-miR-1307-5p	Numeric	6.64	6.64	6.64	6.64	6.64	6.64	6.64	6.64	6.64	6.64
hsa-miR-130a-3p	Numeric	6.64	6.64	6.64	6.64	6.64	6.64	6.64	6.64	6.64	6.64
hsa-miR-130b-3p	Numeric	6.64	6.64	6.64	6.64	6.64	6.64	6.64	6.64	6.64	6.64
hsa-miR-132-3p	Numeric	6.64	6.64	6.64	6.64	6.64	6.64	6.64	6.64	6.64	6.64
hsa-miR-1322	Numeric	6.64	6.64	6.64	6.64	6.64	6.64	6.64	6.64	6.64	6.64
hsa-miR-1323	Numeric	6.64	6.64	6.64	6.64	6.64	6.64	6.64	6.64	6.64	6.64
hsa-miR-133a-3p	Numeric	6.64	6.64	6.64	6.64	6.64	6.64	6.64	6.64	6.64	6.64
hsa-miR-133a-5p	Numeric	6.64	6.64	6.64	6.64	6.64	6.64	6.64	6.64	6.64	6.64
hsa-miR-133b	Numeric	6.64	6.64	6.64	6.64	6.64	6.64	6.64	6.64	6.64	6.64
hsa-miR-134-3p	Numeric	6.64	6.64	6.64	6.64	6.64	6.64	6.64	6.64	6.64	6.64
hsa-miR-134-5p+hsa-miR-6728-5p	Numeric	6.64	6.64	6.64	6.64	6.64	6.64	6.64	6.64	6.64	6.64
hsa-miR-135a-5p	Numeric	6.64	6.64	6.64	6.64	6.64	6.64	6.64	6.64	6.64	6.64
hsa-miR-135b-5p	Numeric	6.64	6.64	6.64	6.64	6.64	6.64	6.64	6.64	6.64	6.64
hsa-miR-136-5p	Numeric	6.64	6.64	6.64	6.64	6.64	6.64	6.64	6.64	6.64	6.64
hsa-miR-137	Numeric	6.64	6.64	6.64	6.64	6.64	6.64	6.64	6.64	6.64	6.64
hsa-miR-138-5p	Numeric	6.64	6.64	6.64	6.64	6.64	6.64	6.64	6.64	6.64	6.64
hsa-miR-139-3p	Numeric	6.64	6.64	6.64	6.64	6.64	6.64	6.64	6.64	6.64	6.64
hsa-miR-139-5p	Numeric	6.64	6.64	6.64	6.64	6.64	6.64	6.64	6.64	6.64	6.64
hsa-miR-140-3p	Numeric	6.64	6.64	6.64	6.64	6.64	6.64	6.64	6.64	6.64	6.64
hsa-miR-140-5p	Numeric	6.64	6.64	6.64	6.64	6.64	6.64	6.64	6.64	6.64	6.64
hsa-miR-141-3p	Numeric	6.64	6.64	6.64	6.64	6.64	6.64	6.64	6.64	6.64	6.64
hsa-miR-142-3p	Numeric	6.64	6.64	6.64	6.64	6.64	6.64	6.64	6.64	6.64	6.64
hsa-miR-142-5p	Numeric	6.64	6.64	6.64	6.64	6.64	6.64	6.64	6.64	6.64	6.64
hsa-miR-143-3p	Numeric	6.64	6.64	6.64	6.64	6.64	6.64	6.64	6.64	6.64	6.64
hsa-miR-144-3p	Numeric	6.64	6.64	6.64	6.64	6.64	6.64	6.64	6.64	6.64	6.64
hsa-miR-145-5p	Numeric	6.64	6.64	6.64	6.64	6.64	6.64	6.64	6.64	6.64	6.64
hsa-miR-1469	Numeric	6.64	6.64	6.64	6.64	6.64	6.64	6.64	6.64	6.64	6.64
hsa-miR-146a-5p	Numeric	6.64	6.64	6.64	6.64	6.64	6.64	6.64	6.64	6.64	6.64
hsa-miR-146b-3p	Numeric	6.64	6.64	6.64	6.64	6.64	6.64	6.64	6.64	6.64	6.64
hsa-miR-146b-5p	Numeric	6.64	6.64	6.64	6.64	6.64	6.64	6.64	6.64	6.64	6.64
hsa-miR-147a	Numeric	6.64	6.64	6.64	6.64	6.64	6.64	6.64	6.64	6.64	6.64
hsa-miR-147b	Numeric	6.64	6.64	6.64	6.64	6.64	6.64	6.64	6.64	6.64	6.64
hsa-miR-148a-3p	Numeric	6.64	6.64	6.64	6.64	6.64	6.64	6.64	6.64	6.64	6.64
hsa-miR-148b-3p	Numeric	6.64	6.64	6.64	6.64	6.64	6.64	6.64	6.64	6.64	6.64
hsa-miR-149-5p	Numeric	6.64	6.64	6.64	6.64	6.64	6.64	6.64	6.64	6.64	6.64
hsa-miR-150-5p	Numeric	6.64	6.64	6.64	6.64	6.64	6.64	6.64	6.64	6.64	6.64
hsa-miR-151a-3p	Numeric	6.64	6.64	6.64	6.64	6.64	6.64	6.64	6.64	6.64	6.64
hsa-miR-151a-5p	Numeric	6.64	6.64	6.64	6.64	6.64	6.64	6.64	6.64	6.64	6.64
hsa-miR-151b	Numeric	6.64	6.64	6.64	6.64	6.64	6.64	6.64	6.64	6.64	6.64
hsa-miR-152-3p	Numeric	6.64	6.64	6.64	6.64	6.64	6.64	6.64	6.64	6.64	6.64
hsa-miR-152-5p	Numeric	6.64	6.64	6.64	6.64	6.64	6.64	6.64	6.64	6.64	6.64
hsa-miR-153-3p	Numeric	6.64	6.64	6.64	6.64	6.64	6.64	6.64	6.64	6.64	6.64
hsa-miR-1537-3p	Numeric	6.64	6.64	6.64	6.64	6.64	6.64	6.64	6.64	6.64	6.64
hsa-miR-154-5p	Numeric	6.64	6.64	6.64	6.64	6.64	6.64	6.64	6.64	6.64	6.64
hsa-miR-155-5p	Numeric	6.64	6.64	6.64	6.64	6.64	6.64	6.64	6.64	6.64	6.64
hsa-miR-15a-5p	Numeric	6.64	6.64	6.64	6.64	6.64	6.64	6.64	6.64	6.64	6.64
hsa-miR-15b-5p	Numeric	6.64	6.64	6.64	6.64	6.64	6.64	6.64	6.64	6.64	6.64
hsa-miR-16-5p	Numeric	6.64	6.64	6.64	6.64	6.64	6.64	6.64	6.64	6.64	6.64
hsa-miR-181a-2-3p	Numeric	6.64	6.64	6.64	6.64	6.64	6.64	6.64	6.64	6.64	6.64
hsa-miR-181a-3p	Numeric	6.64	6.64	6.64	6.64	6.64	6.64	6.64	6.64	6.64	6.64
hsa-miR-181a-5p	Numeric	6.64	6.64	6.64	6.64	6.64	6.64	6.64	6.64	6.64	6.64
hsa-miR-181b-2-3p	Numeric	6.64	6.64	6.64	6.64	6.64	6.64	6.64	6.64	6.64	6.64
hsa-miR-181b-5p+hsa-miR-181d-5p	Numeric	6.64	6.64	6.64	6.64	6.64	6.64	6.64	6.64	6.64	6.64
hsa-miR-181c-5p	Numeric	6.64	6.64	6.64	6.64	6.64	6.64	6.64	6.64	6.64	6.64
hsa-miR-181d-3p	Numeric	6.64	6.64	6.64	6.64	6.64	6.64	6.64	6.64	6.64	6.64
hsa-miR-182-3p	Numeric	6.64	6.64	6.64	6.64	6.64	6.64	6.64	6.64	6.64	6.64
hsa-miR-182-5p	Numeric	6.64	6.64	6.64	6.64	6.64	6.64	6.64	6.64	6.64	6.64
hsa-miR-1827	Numeric	6.64	6.64	6.64	6.64	6.64	6.64	6.64	6.64	6.64	6.64
hsa-miR-183-5p	Numeric	6.64	6.64	6.64	6.64	6.64	6.64	6.64	6.64	6.64	6.64
hsa-miR-184	Numeric	6.64	6.64	6.64	6.64	6.64	6.64	6.64	6.64	6.64	6.64
hsa-miR-185-5p	Numeric	6.64	6.64	6.64	6.64	6.64	6.64	6.64	6.64	6.64	6.64
hsa-miR-186-5p	Numeric	6.64	6.64	6.64	6.64	6.64	6.64	6.64	6.64	6.64	6.64
hsa-miR-187-3p	Numeric	6.64	6.64	6.64	6.64	6.64	6.64	6.64	6.64	6.64	6.64
hsa-miR-188-3p	Numeric	6.64	6.64	6.64	6.64	6.64	6.64	6.64	6.64	6.64	6.64
hsa-miR-188-5p	Numeric	6.64	6.64	6.64	6.64	6.64	6.64	6.64	6.64	6.64	6.64
hsa-miR-18a-5p	Numeric	6.64	6.64	6.64	6.64	6.64	6.64	6.64	6.64	6.64	6.64
hsa-miR-18b-5p	Numeric	6.64	6.64	6.64	6.64	6.64	6.64	6.64	6.64	6.64	6.64
hsa-miR-1908-3p	Numeric	6.64	6.64	6.64	6.64	6.64	6.64	6.64	6.64	6.64	6.64
hsa-miR-1908-5p	Numeric	6.64	6.64	6.64	6.64	6.64	6.64	6.64	6.64	6.64	6.64
hsa-miR-1909-3p	Numeric	6.64	6.64	6.64	6.64	6.64	6.64	6.64	6.64	6.64	6.64
hsa-miR-190a-3p	Numeric	6.64	6.64	6.64	6.64	6.64	6.64	6.64	6.64	6.64	6.64
hsa-miR-190a-5p	Numeric	6.64	6.64	6.64	6.64	6.64	6.64	6.64	6.64	6.64	6.64
hsa-miR-190b	Numeric	6.64	6.64	6.64	6.64	6.64	6.64	6.64	6.64	6.64	6.64
hsa-miR-191-5p	Numeric	6.64	6.64	6.64	6.64	6.64	6.64	6.64	6.64	6.64	6.64
hsa-miR-1910-3p	Numeric	6.64	6.64	6.64	6.64	6.64	6.64	6.64	6.64	6.64	6.64
hsa-miR-1910-5p	Numeric	6.64	6.64	6.64	6.64	6.64	6.64	6.64	6.64	6.64	6.64
hsa-miR-1915-3p	Numeric	6.64	6.64	6.64	6.64	6.64	6.64	6.64	6.64	6.64	6.64
hsa-miR-192-5p	Numeric	6.64	6.64	6.64	6.64	6.64	6.64	6.64	6.64	6.64	6.64
hsa-miR-193a-3p	Numeric	6.64	6.64	6.64	6.64	6.64	6.64	6.64	6.64	6.64	6.64
hsa-miR-193a-5p+hsa-miR-193b-5p	Numeric	6.64	6.64	6.64	6.64	6.64	6.64	6.64	6.64	6.64	6.64
hsa-miR-193b-3p	Numeric	6.64	6.64	6.64	6.64	6.64	6.64	6.64	6.64	6.64	6.64
hsa-miR-194-5p	Numeric	6.64	6.64	6.64	6.64	6.64	6.64	6.64	6.64	6.64	6.64
hsa-miR-195-5p	Numeric	6.64	6.64	6.64	6.64	6.64	6.64	6.64	6.64	6.64	6.64
hsa-miR-196a-3p	Numeric	6.64	6.64	6.64	6.64	6.64	6.64	6.64	6.64	6.64	6.64
hsa-miR-196a-5p	Numeric	6.64	6.64	6.64	6.64	6.64	6.64	6.64	6.64	6.64	6.64
hsa-miR-196b-5p	Numeric	6.64	6.64	6.64	6.64	6.64	6.64	6.64	6.64	6.64	6.64
hsa-miR-197-3p	Numeric	6.64	6.64	6.64	6.64	6.64	6.64	6.64	6.64	6.64	6.64
hsa-miR-197-5p	Numeric	6.64	6.64	6.64	6.64	6.64	6.64	6.64	6.64	6.64	6.64
hsa-miR-1972	Numeric	6.64	6.64	6.64	6.64	6.64	6.64	6.64	6.64	6.64	6.64
hsa-miR-1973	Numeric	6.64	6.64	6.64	6.64	6.64	6.64	6.64	6.64	6.64	6.64
hsa-miR-1976	Numeric	6.64	6.64	6.64	6.64	6.64	6.64	6.64	6.64	6.64	6.64
hsa-miR-198	Numeric	6.64	6.64	6.64	6.64	6.64	6.64	6.64	6.64	6.64	6.64
hsa-miR-199a-3p+hsa-miR-199b-3p	Numeric	6.64	6.64	6.64	6.64	6.64	6.64	6.64	6.64	6.64	6.64
hsa-miR-199a-5p	Numeric	6.64	6.64	6.64	6.64	6.64	6.64	6.64	6.64	6.64	6.64
hsa-miR-199b-5p	Numeric	6.64	6.64	6.64	6.64	6.64	6.64	6.64	6.64	6.64	6.64
hsa-miR-19a-3p	Numeric	6.64	6.64	6.64	6.64	6.64	6.64	6.64	6.64	6.64	6.64
hsa-miR-19b-3p	Numeric	6.64	6.64	6.64	6.64	6.64	6.64	6.64	6.64	6.64	6.64
hsa-miR-200a-3p	Numeric	6.64	6.64	6.64	6.64	6.64	6.64	6.64	6.64	6.64	6.64
hsa-miR-200b-3p	Numeric	6.64	6.64	6.64	6.64	6.64	6.64	6.64	6.64	6.64	6.64
hsa-miR-200c-3p	Numeric	6.64	6.64	6.64	6.64	6.64	6.64	6.64	6.64	6.64	6.64
hsa-miR-202-3p	Numeric	6.64	6.64	6.64	6.64	6.64	6.64	6.64	6.64	6.64	6.64
hsa-miR-203a-3p	Numeric	6.64	6.64	6.64	6.64	6.64	6.64	6.64	6.64	6.64	6.64
hsa-miR-203a-5p	Numeric	6.64	6.64	6.64	6.64	6.64	6.64	6.64	6.64	6.64	6.64
hsa-miR-204-5p	Numeric	6.64	6.64	6.64	6.64	6.64	6.64	6.64	6.64	6.64	6.64
hsa-miR-205-5p	Numeric	6.64	6.64	6.64	6.64	6.64	6.64	6.64	6.64	6.64	6.64
hsa-miR-2053	Numeric	6.64	6.64	6.64	6.64	6.64	6.64	6.64	6.64	6.64	6.64
hsa-miR-206	Numeric	6.64	6.64	6.64	6.64	6.64	6.64	6.64	6.64	6.64	6.64
hsa-miR-208a-3p	Numeric	6.64	6.64	6.64	6.64	6.64	6.64	6.64	6.64	6.64	6.64
hsa-miR-208b-3p	Numeric	6.64	6.64	6.64	6.64	6.64	6.64	6.64	6.64	6.64	6.64
hsa-miR-208b-5p	Numeric	6.64	6.64	6.64	6.64	6.64	6.64	6.64	6.64	6.64	6.64
hsa-miR-20a-5p+hsa-miR-20b-5p	Numeric	6.64	6.64	6.64	6.64	6.64	6.64	6.64	6.64	6.64	6.64
hsa-miR-21-5p	Numeric	6.64	6.64	6.64	6.64	6.64	6.64	6.64	6.64	6.64	6.64
hsa-miR-210-3p	Numeric	6.64	6.64	6.64	6.64	6.64	6.64	6.64	6.64	6.64	6.64
hsa-miR-210-5p	Numeric	6.64	6.64	6.64	6.64	6.64	6.64	6.64	6.64	6.64	6.64
hsa-miR-211-3p	Numeric	6.64	6.64	6.64	6.64	6.64	6.64	6.64	6.64	6.64	6.64
hsa-miR-211-5p	Numeric	6.64	6.64	6.64	6.64	6.64	6.64	6.64	6.64	6.64	6.64
hsa-miR-2110	Numeric	6.64	6.64	6.64	6.64	6.64	6.64	6.64	6.64	6.64	6.64
hsa-miR-2113	Numeric	6.64	6.64	6.64	6.64	6.64	6.64	6.64	6.64	6.64	6.64
hsa-miR-2116-5p	Numeric	6.64	6.64	6.64	7.07	6.64	6.64	7.24	7.05	6.64	8.63
hsa-miR-2117	Numeric	6.64	6.64	6.64	6.64	6.64	6.64	6.64	6.64	6.64	6.64
hsa-miR-212-3p	Numeric	6.64	6.64	6.64	6.64	6.64	6.64	6.64	6.64	6.64	6.64
hsa-miR-214-3p	Numeric	6.64	6.64	6.64	6.64	6.64	6.64	6.64	6.64	6.64	6.64
hsa-miR-215-5p	Numeric	6.64	6.64	6.64	6.64	6.64	6.64	6.64	6.64	6.64	6.64
hsa-miR-216a-5p	Numeric	6.64	6.64	6.64	6.64	6.64	6.64	6.64	6.64	6.64	6.64
hsa-miR-216b-5p	Numeric	6.64	6.64	6.64	6.64	6.64	6.64	6.64	6.64	6.64	6.64
hsa-miR-217	Numeric	6.64	6.64	6.64	6.64	6.64	6.64	6.64	6.64	6.64	6.64
hsa-miR-218-5p	Numeric	6.64	6.64	6.64	6.64	6.64	6.64	6.64	6.64	6.64	6.64
hsa-miR-219a-1-3p	Numeric	6.64	6.64	6.64	6.64	6.64	6.64	6.64	6.64	6.64	6.64
hsa-miR-219a-2-3p	Numeric	6.64	6.64	6.64	6.64	6.64	6.64	6.64	6.64	6.64	6.64
hsa-miR-219a-5p	Numeric	6.64	6.64	6.64	6.64	6.64	6.64	6.64	6.64	6.64	6.64
hsa-miR-219b-3p	Numeric	6.64	6.64	6.64	6.64	6.64	6.64	6.64	6.64	6.64	6.64
hsa-miR-22-3p	Numeric	6.64	6.64	6.64	6.64	6.64	6.64	6.64	6.64	6.64	6.64
hsa-miR-221-3p	Numeric	6.64	6.64	6.64	6.64	6.64	6.64	6.64	6.64	6.64	6.64
hsa-miR-221-5p	Numeric	6.64	6.64	6.64	6.64	6.64	6.64	6.64	6.64	6.64	6.64
hsa-miR-222-3p	Numeric	6.64	6.64	6.64	6.64	6.64	6.64	6.64	6.64	6.64	6.64
hsa-miR-223-3p	Numeric	6.64	6.64	9.03	6.64	6.64	6.64	6.64	6.64	6.64	6.64
hsa-miR-224-5p	Numeric	6.64	6.64	6.64	6.64	6.64	6.64	6.64	6.64	6.64	6.64
hsa-miR-2278	Numeric	6.64	6.64	6.64	6.64	6.64	6.64	6.64	6.64	6.64	6.64
hsa-miR-23a-3p	Numeric	6.64	6.64	7.44	6.64	6.64	6.64	6.64	6.64	6.64	6.64
hsa-miR-23b-3p	Numeric	6.64	6.64	6.64	6.64	6.64	6.64	6.64	6.64	6.64	6.64
hsa-miR-23c	Numeric	6.64	6.64	6.64	6.64	6.64	6.64	6.64	6.64	6.64	6.64
hsa-miR-24-3p	Numeric	6.64	6.64	6.64	6.64	6.64	6.64	6.64	6.64	6.64	6.64
hsa-miR-25-3p	Numeric	6.64	6.64	6.64	6.64	6.64	6.64	6.64	6.64	6.64	6.64
hsa-miR-25-5p	Numeric	6.64	6.64	6.64	6.64	6.64	6.64	6.64	6.64	6.64	6.64
hsa-miR-2682-5p	Numeric	6.64	6.64	6.64	6.64	6.64	6.64	6.64	6.64	6.64	6.64
hsa-miR-26a-5p	Numeric	6.64	6.64	6.64	6.64	6.64	6.64	6.64	6.64	6.64	6.64
hsa-miR-26b-5p	Numeric	6.64	6.64	6.64	6.64	6.64	6.64	6.64	6.64	6.64	6.64
hsa-miR-27a-3p	Numeric	6.64	6.64	6.64	6.64	6.64	6.64	6.64	6.64	6.64	6.64
hsa-miR-27b-3p	Numeric	6.64	6.64	6.64	6.64	6.64	6.64	6.64	6.64	6.64	6.64
hsa-miR-28-3p	Numeric	6.64	6.64	6.64	6.64	6.64	6.64	6.64	6.64	6.64	6.64
hsa-miR-28-5p	Numeric	6.64	6.64	6.64	6.64	6.64	6.64	6.64	6.64	6.64	6.64
hsa-miR-296-3p	Numeric	6.64	6.64	6.64	6.64	6.64	6.64	6.64	6.64	6.64	6.64
hsa-miR-296-5p	Numeric	6.64	6.64	6.64	6.64	6.64	6.64	6.64	6.64	6.64	6.64
hsa-miR-297	Numeric	6.64	6.64	6.64	6.64	6.64	6.64	6.64	6.64	6.64	6.64
hsa-miR-298	Numeric	6.64	6.64	6.64	6.64	6.64	6.64	6.64	6.64	6.64	6.64
hsa-miR-299-3p	Numeric	6.64	6.64	6.64	6.64	6.64	6.64	6.64	6.64	6.64	6.64
hsa-miR-299-5p	Numeric	6.64	6.64	6.64	6.64	6.64	6.64	6.64	6.64	6.64	6.64
hsa-miR-29a-3p	Numeric	6.64	6.64	6.64	6.64	6.64	6.64	6.64	6.64	6.64	6.64
hsa-miR-29b-3p	Numeric	6.64	6.64	6.64	6.64	6.64	6.64	6.64	6.64	6.64	6.64
hsa-miR-29c-3p	Numeric	6.64	6.64	6.64	6.64	6.64	6.64	6.64	6.64	6.64	6.64
hsa-miR-300	Numeric	6.64	6.64	6.64	6.64	6.64	6.64	6.64	6.64	6.64	6.64
hsa-miR-301a-3p	Numeric	6.64	6.64	6.64	6.64	6.64	6.64	6.64	6.64	6.64	6.64
hsa-miR-301a-5p	Numeric	6.64	6.64	6.64	6.64	6.64	6.64	6.64	6.64	6.64	6.64
hsa-miR-301b-3p	Numeric	6.64	6.64	6.64	6.64	6.64	6.64	6.64	6.64	6.64	6.64
hsa-miR-301b-5p	Numeric	6.64	6.64	6.64	6.64	6.64	6.64	6.64	6.64	6.64	6.64
hsa-miR-302a-3p	Numeric	6.64	6.64	6.64	6.64	6.64	6.64	6.64	6.64	6.64	6.64
hsa-miR-302a-5p	Numeric	6.64	6.64	6.64	6.64	6.64	6.64	6.64	6.64	6.64	6.64
hsa-miR-302b-3p	Numeric	6.64	6.64	6.64	6.64	6.64	6.64	6.64	6.64	6.64	6.64
hsa-miR-302c-3p	Numeric	6.64	6.64	6.64	6.64	6.64	6.64	6.64	6.64	6.64	6.64
hsa-miR-302d-3p	Numeric	7.59	8.29	7.08	8.48	8.62	8.31	8.27	8.35	8.88	9.51
hsa-miR-302e	Numeric	6.64	6.64	6.64	6.64	6.64	6.64	6.64	6.64	6.64	6.64
hsa-miR-302f	Numeric	6.64	6.64	6.64	6.64	6.64	6.64	6.64	6.64	6.64	6.64
hsa-miR-3065-3p	Numeric	6.64	6.64	6.64	6.64	6.64	6.64	6.64	6.64	6.64	6.64
hsa-miR-3065-5p	Numeric	6.64	6.64	6.64	6.64	6.64	6.64	6.64	6.64	6.64	6.64
hsa-miR-3074-3p	Numeric	6.64	6.64	6.64	6.64	6.64	6.64	6.64	6.64	6.64	6.64
hsa-miR-30a-3p	Numeric	6.64	6.64	6.64	6.64	6.64	6.64	6.64	6.64	6.64	6.64
hsa-miR-30a-5p	Numeric	6.64	6.64	6.64	6.64	6.64	6.64	6.64	6.64	6.64	6.64
hsa-miR-30b-5p	Numeric	6.64	6.64	6.64	6.64	6.64	6.64	6.64	6.64	6.64	6.64
hsa-miR-30c-5p	Numeric	6.64	6.64	6.64	6.64	6.64	6.64	6.64	6.64	6.64	6.64
hsa-miR-30d-5p	Numeric	6.64	6.64	6.64	6.64	6.64	6.64	6.64	6.64	6.64	6.64
hsa-miR-30e-3p	Numeric	6.64	6.64	6.64	6.64	6.64	6.64	6.64	6.64	6.64	6.64
hsa-miR-30e-5p	Numeric	6.64	7	6.64	6.91	6.64	7.13	7.25	7.51	6.64	8.41
hsa-miR-31-5p	Numeric	6.64	6.64	6.64	6.64	6.64	6.64	6.64	6.64	6.64	6.64
hsa-miR-3127-5p	Numeric	6.64	6.64	6.64	6.64	6.64	6.64	6.64	6.64	6.64	6.64
hsa-miR-3130-3p	Numeric	6.64	6.64	6.64	6.64	6.64	6.64	6.64	6.64	6.64	6.64
hsa-miR-3131	Numeric	6.64	6.64	6.64	6.64	6.64	6.64	6.64	6.64	6.64	6.64
hsa-miR-3136-5p	Numeric	6.64	6.64	6.64	6.64	6.64	6.64	6.64	6.64	6.64	6.64
hsa-miR-3140-3p	Numeric	6.64	6.64	6.64	6.64	6.64	6.64	6.64	6.64	6.64	6.64
hsa-miR-3140-5p	Numeric	6.64	6.64	6.64	6.64	6.64	6.64	6.64	6.64	6.64	6.64
hsa-miR-3144-3p	Numeric	6.64	6.64	6.64	6.64	6.91	7.48	7.29	6.98	8.06	8.26
hsa-miR-3144-5p	Numeric	6.64	6.64	6.64	6.64	6.64	6.64	6.64	6.64	6.64	6.64
hsa-miR-3147	Numeric	6.64	6.64	6.64	6.64	6.64	6.64	6.64	6.64	6.64	6.64
hsa-miR-3150b-3p	Numeric	6.64	6.64	6.64	6.64	6.64	6.64	6.64	6.64	6.64	6.64
hsa-miR-3151-5p	Numeric	6.64	6.64	6.64	6.64	6.64	6.64	6.64	6.64	6.64	6.64
hsa-miR-3158-3p	Numeric	6.64	6.64	6.64	6.64	6.64	6.64	6.64	6.64	6.64	6.64
hsa-miR-3161	Numeric	6.64	6.7	6.64	7.12	6.64	6.64	7.33	7.02	7.79	8.07
hsa-miR-3164	Numeric	6.64	6.64	6.64	6.64	6.64	6.64	6.64	6.64	6.64	6.64
hsa-miR-3168	Numeric	6.64	6.64	6.64	6.64	6.64	6.64	6.64	6.64	6.64	6.64
hsa-miR-3179	Numeric	6.64	6.64	6.64	6.64	6.64	6.64	6.64	6.64	6.64	6.64
hsa-miR-3180	Numeric	6.64	6.64	6.64	6.64	6.64	6.64	6.64	6.64	6.64	6.64
hsa-miR-3180-3p	Numeric	6.64	6.64	6.64	6.64	6.64	6.64	6.64	6.64	6.64	6.64
hsa-miR-3180-5p	Numeric	6.64	6.64	6.64	6.64	6.64	6.64	6.64	6.64	6.64	6.64
hsa-miR-3182	Numeric	6.64	6.64	6.64	6.64	6.64	6.64	6.64	6.64	6.64	6.64
hsa-miR-3185	Numeric	6.64	6.64	6.64	6.64	6.64	6.64	6.64	6.64	6.64	6.64
hsa-miR-3190-3p	Numeric	6.64	6.64	6.64	6.64	6.64	6.64	6.64	6.64	6.64	6.64
hsa-miR-3192-5p	Numeric	6.64	6.64	6.64	6.64	6.64	6.64	6.64	6.64	6.64	6.64
hsa-miR-3195	Numeric	6.64	6.64	6.64	6.64	6.64	6.64	6.64	6.64	6.64	6.64
hsa-miR-3196	Numeric	6.64	6.64	6.64	6.64	6.64	6.64	6.64	6.64	6.64	6.64
hsa-miR-32-5p	Numeric	6.64	6.64	6.64	6.64	6.64	6.64	6.64	6.64	6.64	6.64
hsa-miR-3202	Numeric	6.64	6.64	6.64	6.64	6.64	6.64	6.64	6.64	6.64	6.64
hsa-miR-320a	Numeric	6.64	6.64	6.64	6.64	6.64	6.64	6.64	6.64	6.64	6.64
hsa-miR-320b	Numeric	6.64	6.64	6.64	6.64	6.64	6.64	6.64	6.64	6.64	6.64
hsa-miR-320c	Numeric	6.64	6.64	6.64	6.64	6.64	6.64	6.64	6.64	6.64	6.64
hsa-miR-320d	Numeric	6.64	6.64	6.64	6.64	6.64	6.64	6.64	6.64	6.64	6.64
hsa-miR-320e	Numeric	7.02	7.47	6.64	6.64	6.64	6.64	6.64	6.64	6.64	6.64
hsa-miR-323a-3p	Numeric	6.64	6.64	6.64	6.64	6.64	6.64	6.64	6.64	6.64	6.64
hsa-miR-323a-5p	Numeric	6.64	6.64	6.64	6.64	6.64	6.64	6.64	6.64	6.64	6.64
hsa-miR-323b-3p	Numeric	6.64	6.64	6.64	6.64	6.64	6.64	6.64	6.64	6.64	6.64
hsa-miR-323b-5p	Numeric	6.64	6.64	6.64	6.64	6.64	6.64	6.64	6.64	6.64	6.64
hsa-miR-324-3p	Numeric	6.64	6.64	6.64	6.64	6.64	6.64	6.64	6.64	6.64	6.64
hsa-miR-324-5p	Numeric	6.64	6.64	6.64	6.64	6.64	6.64	6.64	6.64	6.64	6.64
hsa-miR-325	Numeric	6.64	6.64	6.64	6.64	6.64	6.64	6.64	6.64	6.64	6.64
hsa-miR-326	Numeric	6.64	6.64	6.64	6.64	6.64	6.64	6.64	6.64	6.64	6.64
hsa-miR-328-3p	Numeric	6.64	6.64	6.64	6.64	6.64	6.64	6.64	6.64	6.64	6.64
hsa-miR-328-5p	Numeric	6.64	6.64	6.64	6.64	6.64	6.64	6.64	6.64	6.64	6.64
hsa-miR-329-3p	Numeric	6.64	6.64	6.64	6.64	6.64	6.64	6.64	6.64	6.64	6.64
hsa-miR-329-5p	Numeric	6.64	6.64	6.64	6.64	6.64	6.64	6.64	6.64	6.64	6.64
hsa-miR-330-3p	Numeric	6.64	6.64	6.64	6.64	6.64	6.64	6.64	6.64	6.64	6.64
hsa-miR-330-5p	Numeric	6.64	6.64	6.64	6.64	6.64	6.64	6.64	6.64	6.64	6.64
hsa-miR-331-3p	Numeric	6.64	6.64	6.64	6.64	6.64	6.64	6.64	6.64	6.64	6.64
hsa-miR-331-5p	Numeric	6.64	6.64	6.64	6.64	6.64	6.64	6.64	6.64	6.64	6.64
hsa-miR-335-5p	Numeric	6.64	6.64	6.64	6.64	6.64	6.64	6.64	6.64	6.64	6.64
hsa-miR-337-3p	Numeric	6.64	6.64	6.64	6.64	6.64	6.64	6.64	6.64	6.64	6.64
hsa-miR-337-5p	Numeric	6.64	6.64	6.64	6.64	6.64	6.64	6.64	6.64	6.64	6.64
hsa-miR-338-5p	Numeric	6.64	6.64	6.64	6.64	6.64	6.64	6.64	6.64	6.64	6.64
hsa-miR-339-3p	Numeric	6.64	6.64	6.64	6.64	6.64	6.64	6.64	6.64	6.64	6.64
hsa-miR-339-5p	Numeric	6.64	6.64	6.64	6.64	6.64	6.64	6.64	6.64	6.64	6.64
hsa-miR-33a-5p	Numeric	6.64	6.64	6.64	6.64	6.64	6.64	6.64	6.64	6.64	6.64
hsa-miR-33b-5p	Numeric	6.64	6.64	6.64	6.64	6.64	6.64	6.64	6.64	6.64	6.64
hsa-miR-340-5p	Numeric	6.64	6.64	6.64	6.64	6.64	6.64	6.64	6.64	6.64	6.64
hsa-miR-342-3p	Numeric	6.64	6.64	6.64	6.64	6.64	6.64	6.64	6.64	6.64	6.64
hsa-miR-342-5p	Numeric	6.64	6.64	6.64	6.64	6.64	6.64	6.64	6.64	6.64	6.64
hsa-miR-345-3p	Numeric	6.64	6.64	6.64	6.64	6.64	6.64	6.64	6.64	6.64	6.64
hsa-miR-345-5p	Numeric	6.64	6.64	6.64	6.64	6.64	6.64	6.64	6.64	6.64	6.64
hsa-miR-346	Numeric	6.64	6.64	6.64	6.64	6.64	6.64	6.64	6.64	6.64	6.64
hsa-miR-34a-5p	Numeric	6.64	6.64	6.64	6.64	6.64	6.64	6.64	6.64	6.64	6.64
hsa-miR-34b-3p	Numeric	6.64	6.64	6.64	6.64	6.64	6.64	6.64	6.64	6.64	6.64
hsa-miR-34c-3p	Numeric	6.64	6.64	6.64	6.64	6.64	6.64	6.64	6.64	6.64	6.64
hsa-miR-34c-5p	Numeric	6.64	6.64	6.64	6.64	6.64	6.64	6.64	6.64	6.64	6.64
hsa-miR-3605-3p	Numeric	6.64	6.64	6.64	6.64	6.64	6.64	6.64	6.64	6.64	6.64
hsa-miR-3605-5p	Numeric	6.64	6.64	6.64	6.64	6.64	6.64	6.64	6.64	6.64	6.64
hsa-miR-361-3p	Numeric	6.64	6.64	6.64	6.64	6.64	6.64	6.64	6.64	6.64	6.64
hsa-miR-361-5p	Numeric	6.64	6.64	6.64	6.64	6.64	6.64	6.64	6.64	6.64	6.64
hsa-miR-3613-3p	Numeric	6.64	6.64	6.64	6.64	6.64	6.64	6.64	6.64	6.64	6.64
hsa-miR-3613-5p	Numeric	6.64	6.64	6.64	6.64	6.64	6.64	6.64	6.64	6.64	6.64
hsa-miR-3614-3p	Numeric	6.64	6.64	6.64	6.64	6.64	6.64	6.64	6.64	6.64	6.64
hsa-miR-3614-5p	Numeric	6.64	6.64	6.64	6.64	6.64	6.64	6.64	6.64	6.64	6.64
hsa-miR-3615	Numeric	6.64	6.64	6.64	6.64	6.64	6.64	6.64	6.64	6.64	6.64
hsa-miR-362-3p	Numeric	6.64	6.64	6.64	6.64	6.64	6.64	6.64	6.64	6.64	6.64
hsa-miR-362-5p	Numeric	6.64	6.64	6.64	6.64	6.64	6.64	6.64	6.64	6.64	6.64
hsa-miR-363-3p	Numeric	6.64	6.64	6.64	6.64	7.07	7.36	7.19	7.31	7.61	6.64
hsa-miR-363-5p	Numeric	6.64	6.64	6.64	6.64	6.64	6.64	6.64	6.64	6.64	6.64
hsa-miR-365a-3p+hsa-miR-365b-3p	Numeric	6.64	6.64	6.64	6.64	6.64	6.64	6.64	6.64	6.64	6.64
hsa-miR-365b-5p	Numeric	6.64	6.64	6.64	6.64	6.64	6.64	6.64	6.64	6.64	6.64
hsa-miR-367-3p	Numeric	6.64	6.64	6.64	6.64	6.64	6.64	6.64	6.64	6.64	6.64
hsa-miR-369-3p	Numeric	6.64	6.64	6.64	6.64	6.64	6.64	6.64	6.64	6.64	6.64
hsa-miR-369-5p	Numeric	6.64	6.64	6.64	6.64	6.64	6.64	6.64	6.64	6.64	6.64
hsa-miR-3690	Numeric	6.64	6.64	6.64	6.64	6.64	6.64	6.64	6.64	6.64	6.64
hsa-miR-370-3p	Numeric	6.64	6.64	6.64	6.64	6.64	6.64	6.64	6.64	6.64	6.64
hsa-miR-370-5p	Numeric	6.64	6.64	6.64	6.64	6.64	6.64	6.64	6.64	6.64	6.64
hsa-miR-371a-5p	Numeric	6.64	6.64	6.64	6.64	6.64	6.64	6.64	6.64	6.64	6.64
hsa-miR-371b-5p	Numeric	6.64	6.64	6.64	6.64	6.64	6.64	6.64	6.64	6.64	6.64
hsa-miR-372-3p	Numeric	6.64	6.64	6.64	6.64	6.64	6.64	6.64	6.64	6.64	6.64
hsa-miR-373-3p	Numeric	6.64	6.64	6.64	6.64	6.64	6.64	6.64	6.64	6.64	6.64
hsa-miR-374a-3p	Numeric	6.64	6.64	6.64	6.64	6.64	6.64	6.64	6.64	6.64	6.64
hsa-miR-374a-5p	Numeric	6.64	6.64	6.64	6.64	6.64	6.64	6.64	6.64	6.64	6.64
hsa-miR-374b-5p	Numeric	6.64	6.64	6.64	6.64	6.64	6.64	6.64	6.64	6.64	6.64
hsa-miR-374c-5p	Numeric	6.64	6.64	6.64	6.64	6.64	6.64	6.64	6.64	6.64	6.64
hsa-miR-375	Numeric	6.64	6.64	6.64	6.64	6.64	6.64	6.64	6.64	6.64	6.64
hsa-miR-376a-2-5p	Numeric	6.64	6.64	6.64	6.64	6.64	6.64	6.64	6.64	6.64	6.64
hsa-miR-376a-3p	Numeric	6.64	6.64	6.64	6.64	6.64	6.64	6.64	6.64	6.64	6.64
hsa-miR-376b-3p	Numeric	6.64	6.64	6.64	6.64	6.64	6.64	6.64	6.64	6.64	6.64
hsa-miR-376c-3p	Numeric	6.64	6.64	6.64	6.64	6.64	6.64	6.64	6.64	6.64	6.64
hsa-miR-376c-5p	Numeric	6.64	6.64	6.64	6.64	6.64	6.64	6.64	6.64	6.64	6.64
hsa-miR-377-3p	Numeric	6.64	6.64	6.64	6.64	6.64	6.64	6.64	6.64	6.64	6.64
hsa-miR-378b	Numeric	6.64	6.64	6.64	6.64	6.64	6.64	6.64	6.64	6.64	6.64
hsa-miR-378c	Numeric	6.64	6.64	6.64	6.64	6.64	6.64	6.64	6.64	6.64	6.64
hsa-miR-378d	Numeric	6.64	6.64	6.64	6.64	6.64	6.64	6.64	6.64	6.64	6.64
hsa-miR-378e	Numeric	6.64	6.64	6.64	6.64	6.64	6.64	6.64	6.64	6.64	6.64
hsa-miR-378f	Numeric	6.64	6.64	6.64	6.64	6.64	6.64	6.64	6.64	6.64	6.64
hsa-miR-378g	Numeric	6.64	6.64	6.64	6.64	6.64	6.64	6.64	6.64	6.64	6.64
hsa-miR-378h	Numeric	6.64	6.82	6.64	6.95	6.81	6.64	7.45	7.14	7.59	6.64
hsa-miR-378i	Numeric	6.64	6.64	6.64	6.64	6.64	6.64	6.64	6.64	6.64	6.64
hsa-miR-379-5p	Numeric	6.64	6.64	6.64	6.64	6.64	6.64	6.64	6.64	6.64	6.64
hsa-miR-380-3p	Numeric	6.64	6.64	6.64	6.64	6.64	6.64	6.64	6.64	6.64	6.64
hsa-miR-381-3p	Numeric	6.64	6.64	6.64	6.64	6.64	6.64	6.64	6.64	6.64	6.64
hsa-miR-381-5p	Numeric	6.64	6.64	6.64	6.64	6.64	6.64	6.64	6.64	6.64	6.64
hsa-miR-382-3p	Numeric	6.64	6.64	6.64	6.64	6.64	6.64	6.64	6.64	6.64	6.64
hsa-miR-382-5p	Numeric	6.64	6.64	6.64	6.64	6.64	6.64	6.64	6.64	6.64	6.64
hsa-miR-383-5p	Numeric	6.64	6.64	6.64	6.64	6.64	6.64	6.64	6.64	6.64	6.64
hsa-miR-384	Numeric	6.64	6.64	6.64	6.64	6.64	6.64	6.64	6.64	6.64	6.64
hsa-miR-3916	Numeric	6.64	6.64	6.64	6.64	6.64	6.64	6.64	6.64	6.64	6.64
hsa-miR-3918	Numeric	6.64	6.64	6.64	6.64	6.64	6.64	6.64	6.64	6.64	6.64
hsa-miR-3928-3p	Numeric	6.64	6.64	6.64	6.64	6.64	6.64	6.64	6.64	6.64	6.64
hsa-miR-3934-5p	Numeric	6.64	6.64	6.64	6.64	6.64	6.64	6.64	6.64	6.64	6.64
hsa-miR-409-3p	Numeric	6.64	6.64	6.64	6.64	6.64	6.64	6.64	6.64	6.64	6.64
hsa-miR-409-5p	Numeric	6.64	6.64	6.64	6.64	6.64	6.64	6.64	6.64	6.64	6.64
hsa-miR-410-3p	Numeric	6.64	6.64	6.64	6.64	6.64	6.64	6.64	6.64	6.64	6.64
hsa-miR-411-5p	Numeric	6.64	6.64	6.64	6.64	6.64	6.64	6.64	6.64	6.64	6.64
hsa-miR-412-3p	Numeric	6.64	6.64	6.64	6.64	6.64	6.64	6.64	6.64	6.64	6.64
hsa-miR-421	Numeric	6.64	6.64	6.64	6.64	6.64	6.64	6.64	6.64	6.64	6.64
hsa-miR-422a	Numeric	6.64	6.64	6.64	6.64	6.64	6.64	6.64	6.64	6.64	6.64
hsa-miR-423-3p	Numeric	6.64	6.64	6.64	6.64	6.64	6.64	6.64	6.64	6.64	6.64
hsa-miR-423-5p	Numeric	6.64	6.64	6.85	6.64	6.64	6.64	6.64	6.64	6.64	6.64
hsa-miR-424-5p	Numeric	6.64	6.64	6.64	6.64	6.64	6.64	6.64	6.64	6.64	6.64
hsa-miR-425-5p	Numeric	6.64	6.64	6.64	6.64	6.64	6.64	6.64	6.64	6.64	6.64
hsa-miR-4284	Numeric	6.64	6.64	6.64	6.64	6.64	6.64	6.64	6.64	6.64	6.64
hsa-miR-4286	Numeric	6.64	6.64	6.64	6.64	6.64	6.64	6.64	6.64	6.64	6.64
hsa-miR-429	Numeric	6.64	6.64	6.64	6.64	6.64	6.64	6.64	6.64	6.64	6.64
hsa-miR-431-5p	Numeric	6.64	6.64	6.64	6.64	6.64	6.64	6.64	6.64	6.64	6.64
hsa-miR-432-5p	Numeric	6.64	6.64	6.64	6.64	6.64	6.64	6.64	6.64	6.64	6.64
hsa-miR-433-3p	Numeric	6.64	6.64	6.64	6.64	6.64	6.64	6.64	6.64	6.64	6.64
hsa-miR-433-5p	Numeric	6.64	6.64	6.64	6.64	6.64	6.64	6.64	6.64	6.64	6.64
hsa-miR-4421	Numeric	6.64	6.64	6.64	6.64	6.64	6.64	6.64	6.64	6.64	6.64
hsa-miR-4425	Numeric	6.64	6.64	6.64	6.64	6.64	6.64	6.64	6.64	6.64	6.64
hsa-miR-4431	Numeric	6.64	6.64	6.64	6.64	6.64	6.64	6.64	6.64	6.64	6.64
hsa-miR-4435	Numeric	6.64	6.64	6.64	6.64	6.64	6.64	6.64	6.64	6.64	6.64
hsa-miR-4443	Numeric	6.64	6.64	6.64	6.73	6.64	6.64	6.64	6.64	6.64	6.64
hsa-miR-4448	Numeric	6.64	6.64	6.64	6.64	6.64	6.64	6.64	6.64	6.64	6.64
hsa-miR-4451	Numeric	6.64	6.64	6.64	6.64	6.64	6.64	6.64	6.64	6.64	6.64
hsa-miR-4454+hsa-miR-7975	Numeric	8.25	9.27	6.64	7.39	7.38	7.54	8.58	6.64	8.89	9.36
hsa-miR-4455	Numeric	6.64	6.64	6.64	6.64	6.64	6.64	6.64	6.64	6.64	6.64
hsa-miR-4458	Numeric	6.64	6.64	6.64	6.64	6.64	6.64	6.64	6.64	6.64	6.64
hsa-miR-4461	Numeric	6.64	6.64	6.64	6.64	6.64	6.64	6.64	6.64	6.64	6.64
hsa-miR-448	Numeric	6.64	6.64	6.64	6.64	6.64	6.64	6.64	6.64	6.64	6.64
hsa-miR-4485-3p	Numeric	6.64	6.64	6.64	6.64	6.64	6.64	6.64	6.64	6.64	6.64
hsa-miR-4488	Numeric	6.64	6.64	6.64	6.64	6.64	6.64	6.64	6.64	6.64	6.64
hsa-miR-449a	Numeric	6.64	6.64	6.64	6.64	6.64	6.64	6.64	6.64	6.64	6.64
hsa-miR-449b-5p	Numeric	6.64	6.64	6.64	6.64	6.64	6.64	6.64	6.64	6.64	6.64
hsa-miR-449c-5p	Numeric	6.64	6.64	6.64	6.64	6.64	6.64	6.64	6.64	6.64	6.64
hsa-miR-450a-1-3p	Numeric	6.64	6.64	6.64	6.64	6.64	6.64	6.64	6.64	6.64	6.64
hsa-miR-450a-2-3p	Numeric	6.64	6.64	6.64	6.64	6.64	6.64	6.64	6.64	6.64	6.64
hsa-miR-450a-5p	Numeric	6.64	6.64	6.64	6.64	6.64	6.64	6.64	6.64	6.64	6.64
hsa-miR-450b-3p	Numeric	6.64	6.64	6.64	6.64	6.64	6.64	6.64	6.64	6.64	6.64
hsa-miR-450b-5p	Numeric	6.64	6.64	6.64	6.64	6.64	6.64	6.64	6.64	6.64	6.64
hsa-miR-4516	Numeric	6.64	6.64	6.64	6.64	6.64	6.64	6.64	6.64	6.64	6.64
hsa-miR-451a	Numeric	10.6	8.74	10.37	6.64	9.38	8.5	9.05	8.53	8.25	6.64
hsa-miR-452-5p	Numeric	6.64	6.64	6.64	6.64	6.64	6.64	6.64	6.64	6.64	6.64
hsa-miR-4521	Numeric	6.64	6.64	6.64	6.64	6.64	6.64	6.64	6.64	6.64	6.64
hsa-miR-4524a-5p	Numeric	6.64	6.64	6.64	6.64	6.64	6.64	6.64	6.64	6.64	6.64
hsa-miR-4531	Numeric	6.64	6.64	6.64	6.64	6.64	6.64	6.64	6.64	6.64	6.64
hsa-miR-4532	Numeric	6.64	6.64	6.64	6.64	6.64	6.64	6.64	6.64	6.64	6.64
hsa-miR-4536-3p	Numeric	6.64	6.64	6.64	6.64	6.64	6.64	6.64	6.64	6.64	6.64
hsa-miR-4536-5p	Numeric	6.88	7.42	6.64	7.56	7.85	7.6	7.61	7.54	7.72	8.16
hsa-miR-454-3p	Numeric	6.64	6.64	6.64	6.64	6.64	6.64	6.64	6.64	6.64	6.64
hsa-miR-455-3p	Numeric	6.64	6.64	6.64	6.64	6.64	6.64	6.64	6.64	6.64	6.64
hsa-miR-455-5p	Numeric	6.64	6.64	6.64	6.64	6.64	6.64	6.64	6.64	6.64	6.64
hsa-miR-4647	Numeric	6.64	6.64	6.64	6.64	6.64	6.64	6.64	6.64	6.64	6.64
hsa-miR-4707-3p	Numeric	6.64	6.64	6.64	6.64	6.64	6.64	6.64	6.64	6.64	6.64
hsa-miR-4707-5p	Numeric	6.64	6.64	6.64	6.64	6.64	6.64	6.64	6.64	6.64	6.64
hsa-miR-4741	Numeric	6.64	6.64	6.64	6.64	6.64	6.64	6.64	6.64	6.64	6.64
hsa-miR-4755-5p	Numeric	6.64	6.64	6.64	6.64	6.64	6.64	6.64	6.64	6.64	6.64
hsa-miR-4787-3p	Numeric	6.64	6.64	6.64	6.64	6.64	6.64	6.64	6.64	6.64	6.64
hsa-miR-4787-5p	Numeric	6.64	6.64	6.64	6.64	6.64	6.64	6.64	6.64	6.64	6.64
hsa-miR-4792	Numeric	6.64	6.64	6.64	6.64	6.64	6.64	6.64	6.64	6.64	6.64
hsa-miR-483-3p	Numeric	6.64	6.64	6.64	6.64	6.64	6.64	6.64	6.64	6.64	6.64
hsa-miR-483-5p	Numeric	6.64	6.64	6.64	6.64	6.64	6.64	6.64	6.64	6.64	6.64
hsa-miR-484	Numeric	6.64	6.64	6.64	6.64	6.64	6.64	6.64	6.64	6.64	6.64
hsa-miR-485-3p	Numeric	6.64	6.64	6.64	6.64	6.64	6.64	6.64	6.64	6.64	6.64
hsa-miR-485-5p	Numeric	6.64	6.64	6.64	6.64	6.64	6.64	6.64	6.64	6.64	6.64
hsa-miR-486-3p	Numeric	6.64	6.64	6.64	6.64	6.64	6.64	6.64	6.64	6.64	6.64
hsa-miR-487a-3p	Numeric	6.64	6.64	6.64	6.64	6.64	6.64	6.64	6.64	6.64	6.64
hsa-miR-487b-3p	Numeric	6.64	6.64	6.64	6.64	6.64	6.64	6.64	6.64	6.64	6.64
hsa-miR-487b-5p	Numeric	6.64	6.64	6.64	6.64	6.64	6.64	6.64	6.64	6.64	6.64
hsa-miR-488-3p	Numeric	6.64	6.64	6.64	6.64	6.64	6.64	6.64	6.64	6.64	6.64
hsa-miR-489-3p	Numeric	6.64	6.64	6.64	6.64	6.64	6.64	6.64	6.64	6.64	6.64
hsa-miR-490-3p	Numeric	6.64	6.64	6.64	6.64	6.64	6.64	6.64	6.64	6.64	6.64
hsa-miR-490-5p	Numeric	6.64	6.64	6.64	6.64	6.64	6.64	6.64	6.64	6.64	6.64
hsa-miR-491-3p	Numeric	6.64	6.64	6.64	6.64	6.64	6.64	6.64	6.64	6.64	6.64
hsa-miR-491-5p	Numeric	6.64	6.64	6.64	6.64	6.64	6.64	6.64	6.64	6.64	6.64
hsa-miR-492	Numeric	6.64	6.64	6.64	6.64	6.64	6.64	6.64	6.64	6.64	6.64
hsa-miR-493-3p	Numeric	6.64	6.64	6.64	6.64	6.64	6.64	6.64	6.64	6.64	6.64
hsa-miR-494-3p	Numeric	6.64	8.4	6.64	6.64	6.64	6.64	6.64	6.64	6.64	6.64
hsa-miR-494-5p	Numeric	6.64	6.64	6.64	6.64	6.64	6.64	6.64	6.64	6.64	6.64
hsa-miR-495-3p	Numeric	6.76	7.68	6.91	7.72	8.2	8.25	8.16	7.83	8.7	8.75
hsa-miR-495-5p	Numeric	6.64	6.64	6.64	6.64	6.64	6.64	6.64	6.64	6.64	6.64
hsa-miR-496	Numeric	6.64	6.64	6.64	6.64	6.64	6.64	6.64	6.64	6.64	6.64
hsa-miR-497-5p	Numeric	6.64	6.64	6.64	6.64	6.64	6.64	6.64	6.64	6.64	6.64
hsa-miR-498	Numeric	6.64	6.64	6.64	6.64	6.64	6.64	6.64	6.64	6.64	6.64
hsa-miR-499a-3p	Numeric	6.64	6.64	6.64	6.64	6.64	6.64	6.64	6.64	6.64	6.64
hsa-miR-499a-5p	Numeric	6.64	7.8	6.64	7.24	7.76	7.11	7.68	7.37	8.26	8.99
hsa-miR-499b-3p	Numeric	6.64	6.64	6.64	6.64	6.64	6.64	6.64	6.64	6.64	6.64
hsa-miR-499b-5p	Numeric	6.64	6.64	6.64	6.64	6.64	6.64	6.64	6.64	6.64	6.64
hsa-miR-5001-3p	Numeric	6.64	6.64	6.64	6.64	6.64	6.64	6.64	6.64	6.64	6.64
hsa-miR-5001-5p	Numeric	6.64	6.64	6.64	6.64	6.64	6.64	6.64	6.64	6.64	6.64
hsa-miR-500a-5p+hsa-miR-501-5p	Numeric	6.64	6.64	6.64	6.64	6.64	6.64	6.64	6.64	6.64	6.64
hsa-miR-501-3p	Numeric	6.64	6.64	6.64	6.64	6.64	6.64	6.64	6.64	6.64	6.64
hsa-miR-5010-3p	Numeric	6.64	6.64	6.64	6.64	6.64	6.64	6.64	6.64	6.64	6.64
hsa-miR-5010-5p	Numeric	6.64	6.64	6.64	6.64	6.64	6.64	6.64	6.64	6.64	6.64
hsa-miR-502-3p	Numeric	6.64	6.64	6.64	6.64	6.64	6.64	6.64	6.64	6.64	6.64
hsa-miR-502-5p	Numeric	6.64	6.64	6.64	6.64	6.64	6.64	6.64	6.64	6.64	6.64
hsa-miR-503-3p	Numeric	6.64	6.64	6.64	6.64	6.64	6.64	6.64	6.64	6.64	6.64
hsa-miR-503-5p	Numeric	6.64	6.64	6.64	6.64	6.64	6.64	6.64	6.64	6.64	6.64
hsa-miR-504-3p	Numeric	6.64	6.64	6.64	6.64	6.64	6.64	6.64	6.64	6.64	6.64
hsa-miR-504-5p	Numeric	6.64	6.64	6.64	6.64	6.64	6.64	6.64	6.64	6.64	6.64
hsa-miR-505-3p	Numeric	6.64	6.64	6.64	6.64	6.64	6.64	6.64	6.64	6.64	6.64
hsa-miR-506-3p	Numeric	6.64	6.64	6.64	6.64	6.64	6.64	6.64	6.64	6.64	6.64
hsa-miR-506-5p	Numeric	6.64	6.64	6.64	6.64	6.64	6.64	6.64	6.64	6.64	6.64
hsa-miR-507	Numeric	6.64	6.64	6.64	6.64	6.64	6.64	6.64	6.64	6.64	6.64
hsa-miR-508-3p	Numeric	6.64	6.64	6.64	6.64	6.64	6.64	6.64	6.64	6.64	6.64
hsa-miR-508-5p	Numeric	6.64	6.64	6.64	6.64	6.64	6.64	6.64	6.64	6.64	6.64
hsa-miR-509-3-5p	Numeric	6.64	6.64	6.64	6.64	6.64	6.64	6.64	6.64	6.64	6.64
hsa-miR-509-3p	Numeric	6.64	6.64	6.64	6.64	6.64	6.64	6.64	6.64	6.64	6.64
hsa-miR-509-5p	Numeric	6.64	6.64	6.64	6.64	6.64	6.64	6.64	6.64	6.64	6.64
hsa-miR-510-3p	Numeric	6.64	6.64	6.64	6.64	6.64	6.64	6.64	6.64	6.64	6.64
hsa-miR-510-5p	Numeric	6.64	6.64	6.64	6.64	6.64	6.64	6.64	6.64	6.64	6.64
hsa-miR-511-5p	Numeric	6.64	6.64	6.64	6.64	6.64	6.64	6.64	6.64	6.64	6.64
hsa-miR-512-3p	Numeric	6.64	6.64	6.64	6.64	6.64	6.64	6.64	6.64	6.64	6.64
hsa-miR-512-5p	Numeric	6.64	6.64	6.64	6.64	6.64	6.64	6.64	6.64	6.64	6.64
hsa-miR-513a-3p	Numeric	6.64	6.64	6.64	6.64	6.64	6.64	6.64	6.64	6.64	6.64
hsa-miR-513a-5p	Numeric	6.64	6.64	6.64	6.64	6.64	6.64	6.64	6.64	6.64	6.64
hsa-miR-513b-5p	Numeric	6.64	6.64	6.64	6.64	6.64	6.64	6.64	6.64	6.64	6.64
hsa-miR-513c-3p	Numeric	6.64	6.64	6.64	6.64	6.64	6.64	6.64	6.64	6.64	6.64
hsa-miR-513c-5p	Numeric	6.64	6.64	6.64	6.64	6.64	6.64	6.64	6.64	6.64	6.64
hsa-miR-514a-3p	Numeric	6.64	6.64	6.64	6.64	6.64	6.64	6.64	6.64	6.64	6.64
hsa-miR-514a-5p	Numeric	6.64	6.64	6.64	6.64	6.64	6.64	6.64	6.64	6.64	6.64
hsa-miR-514b-3p	Numeric	6.64	6.64	6.64	6.64	6.64	6.64	6.64	6.64	6.64	6.64
hsa-miR-514b-5p	Numeric	6.64	6.64	6.64	6.64	6.64	6.64	6.64	6.64	6.64	6.64
hsa-miR-515-3p	Numeric	6.64	6.64	6.64	6.64	6.64	6.64	6.64	6.64	6.64	6.64
hsa-miR-515-5p	Numeric	6.64	6.64	6.64	6.64	6.64	6.64	6.64	6.64	6.64	6.64
hsa-miR-516a-3p+hsa-miR-516b-3p	Numeric	6.64	6.64	6.64	6.64	6.64	6.64	6.64	6.64	6.64	6.64
hsa-miR-516a-5p	Numeric	6.64	6.64	6.64	6.64	6.64	6.64	6.64	6.64	6.64	6.64
hsa-miR-516b-5p	Numeric	6.64	6.64	6.64	6.64	6.64	6.64	6.64	6.64	6.64	6.64
hsa-miR-517a-3p	Numeric	6.64	6.64	6.64	6.64	6.64	6.64	6.64	6.64	6.64	6.64
hsa-miR-517b-3p	Numeric	6.64	6.64	6.64	6.64	6.64	6.64	6.64	6.64	6.64	6.64
hsa-miR-517c-3p+hsa-miR-519a-3p	Numeric	6.64	6.64	6.64	6.64	6.64	6.64	6.64	6.64	6.64	6.64
hsa-miR-518b	Numeric	6.64	6.64	6.64	6.64	6.64	6.64	6.64	6.64	6.64	6.64
hsa-miR-518c-3p	Numeric	6.64	6.64	6.64	6.64	6.64	6.64	6.64	6.64	6.64	6.64
hsa-miR-518d-3p	Numeric	6.64	6.64	6.64	6.64	6.64	6.64	6.64	6.64	6.64	6.64
hsa-miR-518e-3p	Numeric	6.64	6.64	6.64	6.64	6.64	6.64	6.64	6.64	6.64	6.64
hsa-miR-518f-3p	Numeric	6.64	6.64	6.64	6.64	6.64	6.64	6.64	6.64	6.64	6.64
hsa-miR-5196-3p+hsa-miR-6732-3p	Numeric	6.64	6.64	6.64	6.64	6.64	6.64	6.64	6.64	6.64	6.64
hsa-miR-5196-5p	Numeric	6.64	6.64	6.64	6.64	6.64	6.64	6.64	6.64	6.64	6.64
hsa-miR-519b-3p	Numeric	6.64	6.64	6.64	6.64	6.64	6.64	6.64	6.64	6.64	6.64
hsa-miR-519b-5p+hsa-miR-519c-5p+hsa-miR-523-5p+hsa-miR-518e-5p+hsa-miR-522-5p+hsa-miR-519a-5p	Numeric	6.64	6.64	6.64	6.64	6.64	6.64	6.64	6.64	6.64	6.64
hsa-miR-519c-3p	Numeric	6.64	6.64	6.64	6.64	6.64	6.64	6.64	6.64	6.64	6.64
hsa-miR-519d-3p	Numeric	6.64	6.64	6.64	6.64	6.64	6.64	6.64	6.64	6.64	6.64
hsa-miR-519e-3p	Numeric	6.64	6.64	6.64	6.64	6.64	6.64	6.64	6.64	6.64	6.64
hsa-miR-520a-3p	Numeric	6.64	6.64	6.64	6.64	6.64	6.64	6.64	6.64	6.64	6.64
hsa-miR-520a-5p	Numeric	6.64	6.64	6.64	6.64	6.64	6.64	6.64	6.64	6.64	6.64
hsa-miR-520b	Numeric	6.64	6.64	6.64	6.64	6.64	6.64	6.64	6.64	6.64	6.64
hsa-miR-520c-3p	Numeric	6.64	6.64	6.64	6.64	6.64	6.64	6.64	6.64	6.64	6.64
hsa-miR-520d-3p	Numeric	6.64	6.64	6.64	6.64	6.64	6.64	6.64	6.64	6.64	6.64
hsa-miR-520d-5p+hsa-miR-527+hsa-miR-518a-5p	Numeric	6.64	6.64	6.64	6.64	6.64	6.64	6.64	6.64	6.64	6.64
hsa-miR-520e	Numeric	6.64	6.64	6.64	6.64	6.64	6.64	6.64	6.64	6.64	6.64
hsa-miR-520f-3p	Numeric	6.64	6.64	6.64	6.64	6.64	6.64	6.64	6.64	6.64	6.64
hsa-miR-520g-3p	Numeric	6.64	6.64	6.64	6.64	6.64	6.64	6.64	6.64	6.64	6.64
hsa-miR-520h	Numeric	6.64	6.64	6.64	6.64	6.64	6.64	6.64	6.64	6.64	6.64
hsa-miR-521	Numeric	6.64	6.64	6.64	6.64	6.64	6.64	6.64	6.64	6.64	6.64
hsa-miR-522-3p	Numeric	6.64	6.64	6.64	6.64	6.64	6.64	6.64	6.64	6.64	6.64
hsa-miR-523-3p	Numeric	6.64	6.64	6.64	6.64	6.64	6.64	6.64	6.64	6.64	6.64
hsa-miR-524-3p	Numeric	6.64	6.64	6.64	6.64	6.64	6.64	6.64	6.64	6.64	6.64
hsa-miR-525-3p	Numeric	6.64	6.64	6.64	6.64	6.64	6.64	6.64	6.64	6.64	6.64
hsa-miR-525-5p	Numeric	6.64	6.64	6.64	6.64	6.64	6.64	6.64	6.64	6.64	6.64
hsa-miR-526a+hsa-miR-518c-5p+hsa-miR-518d-5p	Numeric	6.64	6.64	6.64	6.64	6.64	6.64	6.64	6.64	6.64	6.64
hsa-miR-526b-5p	Numeric	6.64	6.64	6.64	6.64	6.64	6.64	6.64	6.64	6.64	6.64
hsa-miR-532-3p	Numeric	6.64	6.64	6.64	6.64	6.64	6.64	6.64	6.64	6.64	6.64
hsa-miR-532-5p	Numeric	6.64	6.64	6.64	6.64	6.64	6.64	6.64	6.64	6.64	6.64
hsa-miR-539-3p	Numeric	6.64	6.64	6.64	6.64	6.64	6.64	6.64	6.64	6.64	6.64
hsa-miR-539-5p	Numeric	6.64	6.64	6.64	6.64	6.64	6.64	6.64	6.64	6.64	6.64
hsa-miR-541-3p	Numeric	6.64	6.64	6.64	6.64	6.64	6.64	6.64	6.64	6.64	6.64
hsa-miR-542-3p	Numeric	6.64	6.64	6.64	6.64	6.64	6.64	6.64	6.64	6.64	6.64
hsa-miR-542-5p	Numeric	6.64	6.64	6.64	6.64	6.64	6.64	6.64	6.64	6.64	6.64
hsa-miR-543	Numeric	6.64	6.64	6.64	6.64	6.64	6.64	6.64	6.64	6.64	6.64
hsa-miR-544a	Numeric	6.64	6.64	6.64	6.64	6.64	6.64	6.64	6.64	6.64	6.64
hsa-miR-545-3p	Numeric	6.64	6.64	6.64	6.64	6.64	6.64	6.64	6.64	6.64	6.64
hsa-miR-548a-3p	Numeric	6.64	6.64	6.64	6.64	6.64	6.64	6.64	6.64	6.64	6.64
hsa-miR-548a-5p	Numeric	6.64	6.64	6.64	6.64	6.64	6.64	6.64	6.64	6.64	6.64
hsa-miR-548aa+hsa-miR-548t-3p	Numeric	6.64	6.87	6.64	7.03	6.64	6.64	6.64	6.64	6.64	6.64
hsa-miR-548ad-3p	Numeric	6.64	6.64	6.64	6.64	6.64	6.64	6.64	6.64	6.64	6.64
hsa-miR-548ah-5p	Numeric	6.64	7.16	6.64	7.18	7.75	7.24	7.65	7.29	8.01	8.64
hsa-miR-548ai+hsa-miR-570-5p	Numeric	6.64	6.64	6.64	6.64	6.64	6.64	6.64	6.64	6.64	6.64
hsa-miR-548ak	Numeric	6.64	6.64	6.64	6.64	6.64	6.64	6.64	6.64	6.64	6.64
hsa-miR-548al	Numeric	6.64	6.64	6.64	6.64	6.64	6.64	6.99	6.64	6.64	6.64
hsa-miR-548ar-3p	Numeric	6.64	6.64	6.64	6.64	6.64	6.64	6.64	6.64	6.64	6.64
hsa-miR-548ar-5p	Numeric	6.64	6.64	6.64	6.64	6.64	6.64	6.64	6.64	6.64	6.64
hsa-miR-548b-3p	Numeric	6.64	6.64	6.64	6.64	6.64	6.64	6.64	6.64	6.64	6.64
hsa-miR-548c-5p+hsa-miR-548o-5p+hsa-miR-548am-5p	Numeric	6.64	6.64	6.64	6.64	6.64	6.64	6.64	6.64	6.64	6.64
hsa-miR-548d-3p	Numeric	6.64	6.64	6.64	6.64	6.64	6.64	6.64	6.64	6.64	6.64
hsa-miR-548d-5p	Numeric	6.64	6.64	6.64	6.64	6.64	6.64	6.64	6.64	6.64	6.64
hsa-miR-548e-3p	Numeric	6.64	6.64	6.64	6.64	6.64	6.64	6.64	6.64	6.64	6.64
hsa-miR-548e-5p	Numeric	6.64	6.64	6.64	6.64	6.64	6.64	6.64	6.64	6.64	6.64
hsa-miR-548g-3p	Numeric	6.79	7.31	6.64	7.48	7.25	7.53	7.65	7.54	7.7	8.26
hsa-miR-548h-5p	Numeric	6.64	6.64	6.64	6.64	6.64	6.64	6.64	6.64	6.64	6.64
hsa-miR-548i	Numeric	6.64	6.64	6.64	6.64	6.64	6.64	6.64	6.64	6.64	6.64
hsa-miR-548j-3p	Numeric	6.64	6.64	6.64	6.64	6.64	6.64	6.64	6.64	6.64	6.64
hsa-miR-548j-5p	Numeric	6.64	6.64	6.64	6.64	6.64	6.64	6.64	6.64	6.64	6.64
hsa-miR-548k	Numeric	6.64	6.64	6.64	6.64	6.64	6.64	6.64	6.64	6.64	6.64
hsa-miR-548l	Numeric	6.64	6.64	6.64	6.64	6.64	6.64	6.64	6.64	6.64	6.64
hsa-miR-548m	Numeric	6.64	6.64	6.64	6.64	6.64	6.64	6.64	6.64	6.64	6.64
hsa-miR-548n	Numeric	6.64	6.75	6.64	6.71	6.64	6.64	6.64	6.64	6.64	6.64
hsa-miR-548o-3p+hsa-miR-548ah-3p+hsa-miR-548av-3p	Numeric	6.64	6.64	6.64	6.64	6.64	6.64	6.64	6.64	6.64	6.64
hsa-miR-548q	Numeric	7.29	7.59	6.99	8.12	7.34	7.54	8.12	8.28	8.25	9.4
hsa-miR-548v	Numeric	6.64	6.64	6.64	6.64	6.64	6.64	6.64	6.64	6.64	6.64
hsa-miR-548y	Numeric	6.64	6.64	6.64	6.64	6.64	6.64	6.64	6.64	6.64	6.64
hsa-miR-548z+hsa-miR-548h-3p	Numeric	6.64	6.64	6.64	6.64	6.64	6.64	6.64	6.64	6.64	6.64
hsa-miR-549a	Numeric	7.46	7.87	6.78	8.11	7.5	7.46	8.12	8.04	8.5	9.04
hsa-miR-550a-5p	Numeric	6.64	6.64	6.64	6.64	6.64	6.64	6.64	6.64	6.64	6.64
hsa-miR-551a	Numeric	6.64	6.64	6.64	6.71	6.64	6.64	7.11	7.18	6.64	6.64
hsa-miR-551b-3p	Numeric	6.64	6.64	6.64	6.64	6.64	6.64	6.64	6.64	6.64	6.64
hsa-miR-552-3p	Numeric	6.64	6.64	6.64	6.64	6.64	6.64	6.64	6.64	6.64	6.64
hsa-miR-553	Numeric	6.64	6.64	6.64	6.64	6.64	6.64	6.64	6.64	6.64	6.64
hsa-miR-554	Numeric	6.64	6.64	6.64	6.64	6.64	6.64	6.64	6.64	6.64	6.64
hsa-miR-555	Numeric	6.64	6.64	6.64	6.64	6.64	6.64	6.64	6.64	6.64	6.64
hsa-miR-556-3p	Numeric	6.64	6.64	6.64	6.64	6.64	6.64	6.64	6.64	6.64	6.64
hsa-miR-556-5p	Numeric	6.64	6.64	6.64	6.64	6.64	6.64	6.64	6.64	6.64	6.64
hsa-miR-561-3p	Numeric	6.64	6.64	6.64	6.64	6.64	6.64	6.64	6.64	6.64	6.64
hsa-miR-561-5p	Numeric	6.64	6.64	6.64	6.64	6.64	6.64	6.64	6.64	6.64	6.64
hsa-miR-562	Numeric	6.64	6.64	6.64	6.64	6.64	6.64	6.64	6.64	6.64	6.64
hsa-miR-563	Numeric	6.64	6.64	6.64	6.64	6.64	6.64	6.64	6.64	6.64	6.64
hsa-miR-564	Numeric	6.64	6.64	6.64	6.64	6.64	6.64	6.64	6.64	6.64	6.64
hsa-miR-566	Numeric	6.64	6.64	6.64	6.64	6.64	6.64	6.64	6.64	6.64	6.64
hsa-miR-567	Numeric	6.64	6.64	6.64	6.64	6.64	6.64	6.64	6.64	6.64	6.64
hsa-miR-568	Numeric	6.64	6.64	6.64	6.64	6.64	6.64	6.64	6.64	6.64	6.64
hsa-miR-570-3p	Numeric	6.64	6.64	6.64	6.64	6.64	6.64	6.64	6.64	6.64	6.64
hsa-miR-571	Numeric	6.64	6.64	6.64	6.64	6.64	6.64	6.64	6.64	6.64	6.64
hsa-miR-572	Numeric	6.64	6.64	6.64	6.64	6.64	6.64	6.64	6.64	6.64	6.64
hsa-miR-573	Numeric	6.64	6.64	6.64	6.64	6.64	6.64	6.64	6.64	6.64	6.64
hsa-miR-574-3p	Numeric	6.64	6.64	6.64	6.64	6.64	6.64	6.64	6.64	6.64	6.64
hsa-miR-574-5p	Numeric	6.64	6.64	6.64	6.64	6.64	6.64	6.64	6.64	6.64	6.64
hsa-miR-575	Numeric	6.64	6.64	6.64	6.64	6.64	6.64	6.64	6.64	6.64	6.64
hsa-miR-576-3p	Numeric	6.64	6.64	6.64	6.64	6.64	6.64	6.64	6.64	6.64	6.64
hsa-miR-576-5p	Numeric	6.64	6.64	6.64	6.64	6.64	6.64	6.64	6.64	6.64	6.64
hsa-miR-577	Numeric	6.64	6.64	6.64	6.64	6.64	6.64	6.64	6.64	6.64	6.64
hsa-miR-578	Numeric	6.64	6.64	6.64	6.64	6.64	6.64	6.64	6.64	6.64	6.64
hsa-miR-579-3p	Numeric	9.21	9.84	6.64	8.19	6.64	6.64	6.64	6.64	6.64	6.64
hsa-miR-579-5p	Numeric	6.64	6.64	6.64	6.64	6.64	6.64	6.64	6.64	6.64	6.64
hsa-miR-580-3p	Numeric	6.64	6.64	6.64	6.64	6.64	6.64	6.64	6.64	6.64	6.64
hsa-miR-582-3p	Numeric	6.64	6.64	6.64	6.64	6.64	6.64	6.64	6.64	6.64	6.64
hsa-miR-582-5p	Numeric	6.64	6.64	6.64	6.64	6.64	6.64	6.64	6.64	6.64	6.64
hsa-miR-584-3p	Numeric	6.64	6.64	6.64	6.64	6.64	6.64	6.64	6.64	6.64	6.64
hsa-miR-584-5p	Numeric	6.64	6.64	6.64	6.64	6.64	6.64	6.64	6.64	6.64	6.64
hsa-miR-585-3p	Numeric	6.64	6.64	6.64	6.64	6.81	6.64	6.64	6.64	6.64	6.64
hsa-miR-587	Numeric	6.64	6.64	6.64	6.64	6.64	6.64	6.64	6.64	6.64	6.64
hsa-miR-589-5p	Numeric	6.64	6.64	6.64	6.64	6.64	6.64	6.64	6.64	6.64	6.64
hsa-miR-590-3p	Numeric	6.64	6.64	6.64	6.64	6.64	6.64	6.64	6.64	6.64	6.64
hsa-miR-590-5p	Numeric	6.88	7.14	6.64	7.73	6.88	7.37	7.88	7.86	7.88	8.34
hsa-miR-591	Numeric	6.64	6.64	6.64	6.64	6.64	6.64	6.64	6.64	6.64	6.64
hsa-miR-592	Numeric	6.64	6.64	6.64	6.64	6.64	6.64	6.64	6.64	6.64	6.64
hsa-miR-593-3p	Numeric	6.64	6.64	6.64	6.64	6.64	6.64	6.64	6.64	6.64	6.64
hsa-miR-595	Numeric	6.64	6.64	6.64	6.64	6.64	6.64	6.64	6.64	6.64	6.64
hsa-miR-596	Numeric	6.64	6.64	6.64	6.64	6.64	6.64	6.64	6.64	6.64	6.64
hsa-miR-597-5p	Numeric	6.64	6.64	6.64	6.64	6.64	6.64	6.64	6.64	6.64	6.64
hsa-miR-598-3p	Numeric	6.64	6.64	6.64	6.64	6.64	6.64	6.64	6.64	6.64	6.64
hsa-miR-599	Numeric	6.64	6.64	6.64	6.64	6.64	6.64	6.64	6.64	6.64	6.64
hsa-miR-600	Numeric	6.64	6.64	6.64	6.64	6.64	6.64	6.64	6.64	6.64	6.64
hsa-miR-601	Numeric	6.64	6.64	6.64	6.64	6.64	6.64	6.64	6.64	6.64	6.64
hsa-miR-603	Numeric	6.64	6.64	6.64	6.64	6.64	6.64	6.64	6.64	6.64	6.64
hsa-miR-604	Numeric	6.64	6.64	6.64	6.64	6.64	6.64	6.64	6.64	6.64	6.64
hsa-miR-605-5p	Numeric	6.64	6.64	6.64	6.64	6.64	6.64	6.64	6.64	6.64	6.64
hsa-miR-606	Numeric	6.64	6.64	6.64	6.64	6.64	6.64	6.64	6.64	6.64	6.64
hsa-miR-607	Numeric	6.64	6.64	6.64	6.64	6.64	6.64	6.64	6.64	6.64	6.64
hsa-miR-608	Numeric	6.64	6.64	6.64	6.64	6.64	6.64	6.64	6.64	6.64	6.64
hsa-miR-610	Numeric	6.64	6.64	6.64	6.64	6.64	6.64	6.64	6.64	6.64	6.64
hsa-miR-612	Numeric	6.64	6.64	6.64	6.97	6.64	6.97	7.19	6.64	6.64	8.21
hsa-miR-613	Numeric	6.64	6.64	6.64	6.64	6.64	6.64	6.64	6.64	6.64	6.64
hsa-miR-614	Numeric	6.64	6.64	6.64	6.64	6.64	6.64	6.64	6.64	6.64	6.64
hsa-miR-615-3p	Numeric	6.64	6.64	6.64	6.64	6.64	6.64	6.64	6.64	6.64	6.64
hsa-miR-615-5p	Numeric	6.64	6.64	6.64	6.64	6.64	6.64	6.64	6.64	6.64	6.64
hsa-miR-616-3p	Numeric	6.64	6.64	6.64	6.64	6.64	6.64	6.64	6.64	6.64	6.64
hsa-miR-617	Numeric	6.64	6.64	6.64	6.64	6.64	6.64	6.64	6.64	6.64	6.64
hsa-miR-619-3p	Numeric	6.64	6.64	6.64	6.64	6.64	6.64	6.64	6.64	6.64	6.64
hsa-miR-620	Numeric	6.64	6.64	6.64	6.64	6.64	6.64	6.64	6.64	6.64	6.64
hsa-miR-624-3p	Numeric	6.64	6.64	6.64	6.64	6.64	6.64	6.64	6.64	6.64	6.64
hsa-miR-625-5p	Numeric	6.64	6.64	6.64	6.64	6.64	6.64	6.64	6.64	6.64	6.64
hsa-miR-626	Numeric	6.64	6.64	6.64	6.64	6.64	6.64	6.64	6.64	6.64	6.64
hsa-miR-627-3p	Numeric	6.64	6.64	6.64	6.64	6.64	6.64	6.64	6.64	6.64	6.64
hsa-miR-627-5p	Numeric	6.64	6.64	6.64	6.64	6.64	6.64	6.64	6.64	6.64	6.64
hsa-miR-628-3p	Numeric	6.64	6.64	6.64	6.64	6.64	6.64	6.64	6.64	6.64	6.64
hsa-miR-628-5p	Numeric	6.64	6.64	6.64	6.64	6.64	6.64	6.64	6.64	6.64	6.64
hsa-miR-629-5p	Numeric	6.64	6.64	6.64	6.64	6.64	6.64	6.64	6.64	6.64	6.64
hsa-miR-630	Numeric	6.64	6.64	6.64	6.64	6.64	6.64	6.64	6.64	6.64	6.64
hsa-miR-631	Numeric	6.64	6.64	6.64	6.64	6.64	6.64	6.64	6.64	6.64	6.64
hsa-miR-637	Numeric	6.64	6.64	6.64	6.64	6.64	6.64	6.64	6.64	6.64	6.64
hsa-miR-638	Numeric	6.64	6.64	6.64	6.64	6.64	6.64	6.64	6.64	6.64	6.64
hsa-miR-639	Numeric	6.64	6.64	6.64	6.64	6.64	6.64	6.64	6.64	6.64	6.64
hsa-miR-640	Numeric	6.64	6.64	6.64	6.64	6.64	6.64	6.64	6.64	6.64	6.64
hsa-miR-641	Numeric	6.64	6.64	6.64	6.64	6.64	6.64	6.64	6.64	6.64	6.64
hsa-miR-642a-3p	Numeric	6.64	6.64	6.64	6.64	6.64	6.64	6.64	6.64	6.64	6.64
hsa-miR-642a-5p	Numeric	6.64	6.64	6.64	6.64	6.64	6.64	6.64	6.64	6.64	6.64
hsa-miR-643	Numeric	6.64	6.64	6.64	6.64	6.64	6.64	6.64	6.64	6.64	6.64
hsa-miR-644a	Numeric	8.12	8.47	7.72	8.86	8.22	8.69	9	9.11	9.25	9.69
hsa-miR-648	Numeric	6.64	6.64	6.64	6.64	6.64	6.64	6.64	6.64	6.64	6.64
hsa-miR-649	Numeric	6.64	6.64	6.64	6.64	6.64	6.64	6.64	6.64	6.64	6.64
hsa-miR-650	Numeric	6.64	6.64	6.64	6.64	6.64	6.64	6.64	6.64	6.64	6.64
hsa-miR-6503-3p	Numeric	6.64	6.64	6.64	6.64	6.64	6.64	6.64	6.64	6.64	6.64
hsa-miR-6503-5p	Numeric	6.64	6.64	6.64	6.64	6.64	6.64	6.64	6.64	6.64	6.64
hsa-miR-651-3p	Numeric	6.64	6.64	6.64	6.64	6.64	6.64	6.64	6.64	6.64	6.64
hsa-miR-651-5p	Numeric	6.64	6.64	6.64	6.64	6.64	6.64	6.64	6.64	6.64	6.64
hsa-miR-6511a-3p	Numeric	6.64	6.64	6.64	6.64	6.64	6.64	6.64	6.64	6.64	6.64
hsa-miR-6511a-5p	Numeric	6.64	6.64	6.64	6.64	6.64	6.64	6.64	6.64	6.64	6.64
hsa-miR-652-3p	Numeric	6.64	6.64	6.64	6.64	6.64	6.64	6.64	6.64	6.64	6.64
hsa-miR-652-5p	Numeric	6.64	6.64	6.64	6.64	6.64	6.64	6.64	6.64	6.64	6.64
hsa-miR-654-3p	Numeric	6.64	6.64	6.64	6.64	6.64	6.64	6.64	6.64	6.64	6.64
hsa-miR-654-5p	Numeric	6.64	6.64	6.64	6.64	6.64	6.64	6.64	6.64	6.64	6.64
hsa-miR-655-3p	Numeric	6.64	6.64	6.64	6.64	6.64	6.64	6.64	6.64	6.64	6.64
hsa-miR-656-3p	Numeric	6.64	6.64	6.64	6.64	6.64	6.64	6.64	6.64	6.64	6.64
hsa-miR-660-3p	Numeric	6.64	6.64	6.64	6.64	6.64	6.64	6.64	6.64	6.64	6.64
hsa-miR-660-5p	Numeric	6.64	6.64	6.64	6.64	6.64	6.64	6.64	6.64	6.64	6.64
hsa-miR-661	Numeric	6.64	6.64	6.64	6.64	6.64	6.64	6.64	6.64	6.64	6.64
hsa-miR-663a	Numeric	6.64	6.64	6.64	6.64	6.64	6.64	6.64	6.64	6.64	6.64
hsa-miR-664a-3p	Numeric	6.64	6.64	6.64	6.64	6.64	6.64	6.64	6.64	6.64	6.64
hsa-miR-664b-3p	Numeric	6.64	6.64	6.64	6.64	6.64	6.64	6.64	6.64	6.64	6.64
hsa-miR-664b-5p	Numeric	6.64	6.64	6.64	6.64	6.64	6.64	6.64	6.64	6.64	6.64
hsa-miR-665	Numeric	6.64	6.64	6.64	6.64	6.64	6.64	6.64	6.64	6.64	6.64
hsa-miR-671-3p	Numeric	6.64	6.64	6.64	6.64	6.64	6.64	6.64	6.64	6.64	6.64
hsa-miR-671-5p	Numeric	6.64	6.64	6.64	6.64	6.64	6.64	6.64	6.64	6.64	6.64
hsa-miR-6720-3p	Numeric	6.64	6.64	6.64	6.64	6.64	6.64	6.64	6.64	6.64	6.64
hsa-miR-6721-5p	Numeric	6.64	6.64	6.64	6.99	6.93	7.28	7.7	7.55	7.74	6.64
hsa-miR-6724-5p	Numeric	6.64	6.64	6.64	6.64	6.64	6.64	6.64	6.64	6.64	6.64
hsa-miR-675-5p	Numeric	6.64	6.64	6.64	6.64	6.64	6.64	6.64	6.64	6.64	6.64
hsa-miR-7-5p	Numeric	6.64	6.64	6.64	6.64	6.64	6.64	6.64	6.64	6.64	6.64
hsa-miR-708-5p	Numeric	6.64	6.64	6.64	6.64	6.64	6.64	6.64	6.64	6.64	6.64
hsa-miR-744-5p	Numeric	6.64	6.64	6.64	6.64	6.64	6.64	6.64	6.64	6.64	6.64
hsa-miR-758-3p+hsa-miR-411-3p	Numeric	6.64	6.64	6.64	6.64	6.64	6.64	6.64	6.64	6.64	6.64
hsa-miR-758-5p	Numeric	6.64	6.64	6.64	6.64	6.64	6.64	6.64	6.64	6.64	6.64
hsa-miR-760	Numeric	6.64	6.64	6.64	6.64	6.64	6.64	6.64	6.64	6.64	6.64
hsa-miR-761	Numeric	6.64	6.64	6.64	6.64	6.64	6.64	6.64	6.64	6.64	6.64
hsa-miR-764	Numeric	6.64	6.64	6.64	6.64	6.64	6.64	6.64	6.64	6.64	6.64
hsa-miR-765	Numeric	6.64	6.64	6.64	6.64	6.64	6.64	6.64	6.64	6.64	6.64
hsa-miR-766-3p	Numeric	6.64	6.64	6.64	6.64	6.64	6.64	6.64	6.64	6.64	6.64
hsa-miR-766-5p	Numeric	6.64	6.64	6.64	6.64	6.64	6.64	6.64	6.64	6.64	6.64
hsa-miR-767-3p	Numeric	6.64	6.64	6.64	6.64	6.64	6.64	6.64	6.64	6.64	6.64
hsa-miR-767-5p	Numeric	6.64	6.64	6.64	6.64	6.64	6.64	6.64	6.64	6.64	6.64
hsa-miR-769-3p	Numeric	6.64	6.64	6.64	6.64	6.64	6.64	6.64	6.64	6.64	6.64
hsa-miR-769-5p	Numeric	6.64	6.64	6.64	6.64	6.64	6.64	6.64	6.64	6.64	6.64
hsa-miR-770-5p	Numeric	6.64	6.64	6.64	6.64	6.64	6.64	6.64	6.64	6.64	6.64
hsa-miR-802	Numeric	6.64	6.64	6.64	6.64	6.64	6.64	6.64	6.64	6.64	6.64
hsa-miR-873-3p	Numeric	6.64	6.64	6.64	6.64	6.81	7.09	7.15	7.28	6.64	6.64
hsa-miR-873-5p	Numeric	6.64	6.64	6.64	6.64	6.64	6.64	6.64	6.64	6.64	6.64
hsa-miR-874-3p	Numeric	6.64	6.64	6.64	6.64	6.64	6.64	6.64	6.64	6.64	6.64
hsa-miR-874-5p	Numeric	6.64	6.64	6.64	6.64	6.64	6.64	6.64	6.64	6.64	6.64
hsa-miR-875-3p	Numeric	6.64	6.64	6.64	6.64	6.64	6.64	6.64	6.64	6.64	6.64
hsa-miR-876-3p	Numeric	6.64	6.64	6.64	6.64	6.64	6.64	6.64	6.64	6.64	6.64
hsa-miR-876-5p	Numeric	6.64	6.64	6.64	6.64	6.64	6.64	6.64	6.64	6.64	6.64
hsa-miR-877-5p	Numeric	6.64	6.64	6.64	6.64	6.64	6.64	6.64	6.64	6.64	6.64
hsa-miR-885-3p	Numeric	6.64	6.64	6.64	6.64	6.64	6.64	6.64	6.64	6.64	6.64
hsa-miR-885-5p	Numeric	6.64	6.64	6.64	6.64	6.64	6.64	6.64	6.64	6.64	6.64
hsa-miR-887-3p	Numeric	6.64	6.64	6.64	6.64	6.64	6.64	6.64	6.64	6.64	6.64
hsa-miR-887-5p	Numeric	6.64	6.64	6.64	6.64	6.64	6.64	6.64	6.64	6.64	6.64
hsa-miR-888-5p	Numeric	6.64	6.64	6.64	6.64	6.64	6.64	6.64	6.64	6.64	6.64
hsa-miR-889-3p	Numeric	6.64	6.64	6.64	6.64	6.64	6.64	6.64	6.64	6.64	6.64
hsa-miR-890	Numeric	6.64	6.64	6.64	6.64	6.64	6.64	6.64	6.64	6.64	6.64
hsa-miR-891a-5p	Numeric	6.64	6.64	6.64	6.64	6.64	6.64	6.64	6.64	6.64	6.64
hsa-miR-891b	Numeric	6.64	6.64	6.64	6.64	6.64	6.64	6.64	6.64	6.64	6.64
hsa-miR-892a	Numeric	6.64	6.64	6.64	6.64	6.64	6.64	6.64	6.64	6.64	6.64
hsa-miR-892b	Numeric	6.64	6.64	6.64	6.64	6.64	6.64	6.64	6.64	6.64	6.64
hsa-miR-9-5p	Numeric	6.64	6.64	6.64	6.64	6.64	6.64	6.64	6.64	6.64	6.64
hsa-miR-922	Numeric	6.64	6.64	6.64	6.64	6.64	6.64	6.64	6.64	6.64	6.64
hsa-miR-924	Numeric	6.64	6.64	6.64	6.64	6.64	6.64	6.64	6.64	6.64	6.64
hsa-miR-92a-1-5p	Numeric	6.64	6.64	6.64	6.64	6.64	6.64	6.64	6.64	6.64	6.64
hsa-miR-92a-3p	Numeric	6.64	6.64	6.64	6.64	6.64	6.64	6.64	6.64	6.64	6.64
hsa-miR-92b-3p	Numeric	6.64	6.64	6.64	6.64	6.64	6.64	6.64	6.64	6.64	6.64
hsa-miR-93-5p	Numeric	6.64	6.64	6.64	6.64	6.64	6.64	6.64	6.64	6.64	6.64
hsa-miR-933	Numeric	6.64	6.64	6.64	6.64	6.64	6.64	6.64	6.64	6.64	6.64
hsa-miR-934	Numeric	6.64	6.64	6.64	6.64	6.64	6.64	6.64	6.64	6.64	6.64
hsa-miR-935	Numeric	6.64	6.64	6.64	6.64	6.64	6.64	6.64	6.64	6.64	6.64
hsa-miR-936	Numeric	6.64	6.64	6.64	6.64	6.64	6.64	6.64	6.64	6.64	6.64
hsa-miR-937-3p	Numeric	6.64	6.64	6.64	6.64	6.64	6.64	6.64	6.64	6.64	6.64
hsa-miR-939-5p	Numeric	6.64	6.64	6.64	6.64	6.64	6.64	6.64	6.64	6.64	6.64
hsa-miR-940	Numeric	6.64	6.64	6.64	6.64	6.64	6.64	6.64	6.64	6.64	6.64
hsa-miR-941	Numeric	6.64	6.64	6.64	6.64	6.64	6.64	6.64	6.64	6.64	6.64
hsa-miR-942-3p	Numeric	6.64	6.64	6.64	6.64	6.64	6.64	6.64	6.64	6.64	6.64
hsa-miR-942-5p	Numeric	6.64	6.64	6.64	6.64	6.64	6.64	6.64	6.64	6.64	6.64
hsa-miR-944	Numeric	6.64	6.64	6.64	6.64	6.64	6.64	6.64	6.64	6.64	6.64
hsa-miR-95-3p	Numeric	6.64	6.64	6.64	6.64	6.64	6.64	6.64	6.64	6.64	6.64
hsa-miR-96-5p	Numeric	6.64	6.64	6.64	6.64	6.64	6.64	6.64	6.64	6.64	6.64
hsa-miR-98-3p	Numeric	6.64	6.64	6.64	6.64	6.64	6.64	6.64	6.64	6.64	6.64
hsa-miR-98-5p	Numeric	6.64	6.64	6.64	6.64	6.64	6.64	6.64	6.64	6.64	6.64
hsa-miR-99a-5p	Numeric	6.64	6.64	6.64	6.64	6.64	6.64	6.64	6.64	6.64	6.64
hsa-miR-99b-5p	Numeric	6.64	6.64	6.64	6.64	6.64	6.64	6.64	6.64	6.64	6.64
ACTB	Numeric	6.64	6.64	6.64	6.64	6.64	6.64	6.64	6.64	6.64	6.64
B2M	Numeric	6.64	6.64	6.64	6.64	6.64	6.64	6.64	6.64	6.64	6.64
GAPDH	Numeric	6.64	6.64	6.64	6.64	6.64	6.64	6.64	6.64	6.64	6.64
RPL19	Numeric	6.64	6.64	6.64	6.64	6.64	6.64	6.64	6.64	6.64	6.64
RPLP0	Numeric	6.64	6.64	6.64	6.64	6.64	6.64	6.64	6.64	6.64	6.64
LIG_NEG_A	Numeric	6.64	6.64	6.64	6.64	6.64	6.64	6.64	6.64	6.64	6.64
LIG_NEG_B	Numeric	6.64	6.64	6.64	6.64	6.64	6.64	6.64	6.64	6.64	6.64
LIG_NEG_C	Numeric	6.64	6.64	6.64	6.64	6.64	6.64	6.64	6.64	6.64	6.64
LIG_POS_A	Numeric	12.64	13.03	12.76	13.38	12.1	12.69	12.97	12.84	12.72	13.04
LIG_POS_B	Numeric	10.96	11.44	10.96	11.84	10.82	11.28	11.5	11.29	11.36	11.72
LIG_POS_C	Numeric	8.28	8.66	8.4	9.17	8.03	8.67	9.06	8.82	8.92	9.26
NEG_A	Numeric	4.81	3.91	4.17	4.25	4.09	4.46	4.46	4.58	3.58	4.17
NEG_B	Numeric	3.7	4.09	4.09	4.25	3.46	4.75	4.17	4.25	3.7	3.46
NEG_C	Numeric	6.44	6.07	6.23	6.71	6.51	6.78	6.78	6.91	6.07	6.15
NEG_D	Numeric	4.32	4.46	4.39	5.04	4.64	4.91	5.25	5.17	4.81	4.64
NEG_E	Numeric	4.32	4	3.91	4.52	4.86	4.39	4.75	4.52	4.32	4.09
NEG_F	Numeric	4.52	4.52	4.91	5.43	4.39	4.95	4.95	4.32	4.7	4.32
NEG_G	Numeric	4.17	4.09	3.46	3.91	4	3.91	2.81	3.32	4	3.7
NEG_H	Numeric	4.09	4.09	3.7	4.75	3.81	4.39	4.17	4.09	4.17	3.58
POS_A	Numeric	14.3	13.94	14.43	14.48	14.45	14.76	14.73	14.62	14.19	13.99
POS_B	Numeric	12.85	12.53	13.04	13.09	13.02	13.38	13.3	13.22	12.71	12.47
POS_C	Numeric	11.23	10.9	11.4	11.42	11.36	11.64	11.67	11.54	11.17	11
POS_D	Numeric	8.88	8.48	8.78	9.06	9.03	9.29	9.25	9.17	8.86	8.57
POS_E	Numeric	6.83	6.61	6.67	6.79	6.77	7	7.16	7.07	6.55	6.25
POS_F	Numeric	6.02	5.32	6.09	6.44	6.43	6.43	6.13	6.36	6	5.58
ath-miR159a	Numeric	6.64	6.64	6.64	6.64	6.64	6.64	6.64	6.64	6.64	6.64
cel-miR-248	Numeric	6.64	6.64	6.64	6.64	6.64	6.64	6.64	6.64	6.64	6.64
cel-miR-254	Numeric	9.78	9.78	9.78	9.78	9.78	9.78	9.78	9.78	9.78	9.78
osa-miR414	Numeric	6.64	6.64	6.64	6.64	6.64	6.64	6.64	6.64	6.64	6.64
osa-miR442	Numeric	6.64	6.64	6.64	6.64	6.64	6.64	6.64	6.64	6.64	6.64
