# Supplementary material for: Vitamin C supplementation reduces expression of circulating miR-451a in subjects with poorly controlled type 2 diabetes mellitus and high oxidative stress
Source: PeerJ. 2021 Feb 4;9:e10776. doi: 10.7717/peerj.10776 (PMC7868066; doi:10.7717/peerj.10776)
Supplement: Supplemental Information 1 — miRNA analysis showing 38 first rank with p-value. [file peerj-09-10776-s001.xlsx]

## Sheet: Report
Rank	Gene		p-value	Group 1 [max min ave]	Ex.	None	Group 2 [max min ave]	Ex.	None
1	hsa-miR-1253	2	0.027587	10.16 8.7 9.31	5	0	11.05 9.23 9.93	5	0
2	hsa-miR-1290	2	0.036458	8.35 6.64 7.32	5	0	9.22 6.98 7.85	5	0
3	hsa-miR-451a	1	0.036756	10.6 8.25 9.53	5	0	8.74 6.64 7.81	5	0
4	hsa-miR-644a	2	0.042983	9.25 7.72 8.46	5	0	9.69 8.47 8.96	5	0
5	hsa-miR-548g-3p	2	0.058387	7.7 6.64 7.21	5	0	8.26 7.31 7.62	5	0
6	hsa-miR-548q	2	0.060318	8.25 6.99 7.6	5	0	9.4 7.54 8.19	5	0
7	hsa-miR-590-5p	2	0.067131	7.88 6.64 7.23	5	0	8.34 7.14 7.69	5	0
8	hsa-miR-30e-5p	2	0.093934	7.25 6.64 6.76	5	0	8.41 6.91 7.39	5	0
9	hsa-miR-302d-3p	2	0.161437	8.88 7.08 8.09	5	0	9.51 8.29 8.59	5	0
10	hsa-miR-549a	2	0.165868	8.5 6.78 7.67	5	0	9.04 7.46 8.1	5	0
11	hsa-miR-551a	2	0.177807	7.11 6.64 6.73	5	0	7.18 6.64 6.76	5	0
12	hsa-miR-548n	2	0.191575	6.64 6.64 6.64	5	0	6.75 6.64 6.68	5	0
13	hsa-miR-548aa+hsa-miR-548t-3p	2	0.196242	6.64 6.64 6.64	5	0	7.03 6.64 6.76	5	0
14	hsa-miR-4536-5p	2	0.210504	7.85 6.64 7.34	5	0	8.16 7.42 7.66	5	0
15	hsa-miR-873-3p	2	0.213837	7.15 6.64 6.78	5	0	7.28 6.64 6.86	5	0
16	hsa-miR-579-3p	2	0.224882	9.21 6.64 7.15	5	0	9.84 6.64 7.59	5	0
17	hsa-miR-495-3p	2	0.281996	8.7 6.76 7.75	5	0	8.75 7.68 8.05	5	0
18	hsa-miR-2116-5p	2	0.326422	7.24 6.64 6.76	5	0	8.63 6.64 7.21	5	0
19	hsa-miR-1185-2-3p	1	0.373900	7.11 6.64 6.73	5	0	6.64 6.64 6.64	5	0
20	hsa-miR-1206	1	0.373900	7.08 6.64 6.73	5	0	6.64 6.64 6.64	5	0
21	hsa-miR-223-3p	1	0.373900	9.03 6.64 7.12	5	0	6.64 6.64 6.64	5	0
22	hsa-miR-23a-3p	1	0.373900	7.44 6.64 6.8	5	0	6.64 6.64 6.64	5	0
23	hsa-miR-320e	2	0.373900	7.02 6.64 6.72	5	0	7.47 6.64 6.81	5	0
24	hsa-miR-423-5p	1	0.373900	6.85 6.64 6.68	5	0	6.64 6.64 6.64	5	0
25	hsa-miR-4443	2	0.373900	6.64 6.64 6.64	5	0	6.73 6.64 6.66	5	0
26	hsa-miR-494-3p	2	0.373900	6.64 6.64 6.64	5	0	8.4 6.64 6.99	5	0
27	hsa-miR-548al	1	0.373900	6.99 6.64 6.71	5	0	6.64 6.64 6.64	5	0
28	hsa-miR-585-3p	1	0.373900	6.81 6.64 6.67	5	0	6.64 6.64 6.64	5	0
29	hsa-miR-612	2	0.388841	7.19 6.64 6.75	5	0	8.21 6.64 7.09	5	0
30	hsa-miR-122-5p	2	0.408082	8.39 6.64 7.43	5	0	8.41 7.27 7.79	5	0
31	hsa-miR-499a-5p	2	0.416869	8.26 6.64 7.4	5	0	8.99 7.11 7.7	5	0
32	hsa-miR-378h	1	0.443402	7.59 6.64 7.03	5	0	7.14 6.64 6.84	5	0
33	hsa-miR-3161	2	0.487442	7.79 6.64 7.01	5	0	8.07 6.64 7.11	5	0
34	hsa-miR-548ah-5p	2	0.542071	8.01 6.64 7.34	5	0	8.64 7.16 7.5	5	0
35	hsa-miR-3144-3p	2	0.559428	8.06 6.64 7.11	5	0	8.26 6.64 7.2	5	0
36	hsa-miR-363-3p	1	0.638940	7.61 6.64 7.03	5	0	7.36 6.64 6.92	5	0
37	hsa-miR-6721-5p	1	0.700610	7.74 6.64 7.13	5	0	7.55 6.64 7.02	5	0
38	hsa-miR-4454+hsa-miR-7975	2	0.870080	8.89 6.64 7.95	5	0	9.36 6.64 8.04	5	0
